# Supplementary material for: Isolation and Characterisation of Bacteriophage Selective for Key Acinetobacter baumannii Capsule Chemotypes
Source: Pharmaceuticals (Basel). 2022 Apr 2;15(4):443. doi: 10.3390/ph15040443 (PMC9027227; doi:10.3390/ph15040443)
Supplement: Supplementary file 1 [file pharmaceuticals-15-00443-s001.zip]

Archive with 5 entries (4 files):
- Supplemental Material1.xlsx
- __MACOSX/
- __MACOSX/._Supplemental Material1.xlsx
- Supplemental Material 2.pdf
- __MACOSX/._Supplemental Material 2.pdf
