# Supplementary material for: Isolation and Characterisation of Bacteriophage Selective for Key Acinetobacter baumannii Capsule Chemotypes
Source: Pharmaceuticals (Basel). 2022 Apr 2;15(4):443. doi: 10.3390/ph15040443 (PMC9027227; doi:10.3390/ph15040443)
Supplement: Supplementary file 1 [file pharmaceuticals-15-00443-s001.zip › Supplemental Material1.xlsx]

## Sheet: Table S2
Table S2A. Cross-infectivity of the isolated bacteriophages.
							A. baumannii phages
K-type	A. baumannii strains	P1245	T1245	P444	T444	P24	P515	T515	T55	T17	P92	T92	P521	P1051	P1033	P245	S419	P45	P1257	P79	P373
KL2	AB1039
KL2	AB1492-09
KL2	AB3396
KL2	AB4452-09
KL3	AB11
KL3	ABJNH-403
KL6	AB6
KL6	AB7
KL6	AB9
KL6	ABMYSP-497(1)
KL6	ABMYSP-185
KL6	ABMYSP-216
KL6	ABMYH-1652
KL6	ABMYSP-475
KL6	ABMYSP-477
KL6	ABMYSP-479
KL6	ABMYSP-497(2)
KL6	ABMYSP-517
KL6	ABMASP-366
KL6	ABMASP-379
KL6	ABMASP-491
KL6	ABAPSP-195
KL6	ABAPU-469
KL6	ABAPU-722
KL6	ABMYSP-494
KL6	ABMYSP-6
KL6	ABMYSP-207
KL6	ABMYSP-210
KL6	ABMYSP-245
KL6	ABMYH-1033
KL6	ABMYSP-419
KL10	ABMYSP-109
KL10	ABMYH-1245
KL10	ABAPSP-55
KL10	ABAPSP-64
KL10	ABMYSP-101
KL10	ABMYSP-182
KL10	ABMYSP-187
KL10	ABMYH-797
KL47	AB15
KL47	ABAPP-61
KL49	AB8
KL49	AB14
KL49	AB724
KL49	AB1719-09
KL49	AB2792
KL52	AB1
KL52	ABMYSP-444
KL52	ABMYSP-21
White background indicates no lysis area, black marks clearly detected complete lysis area, gray indicates clearing throughout with faintly hazy background, and light gray indicates very dim lysis area in the spot test.
Table S2B. Summary table of phage infectivity on different KL types.
	KL2	KL3	KL6	KL10	KL47	KL49	KL52	Total
Phage	4 isolates	2 isolates	25 isolates	8 isolates	2 isolates	5 isolates	3 isolates	49 isolates
P1245	0	1	0	8	0	0	0	9
T1245	0	1	0	8	0	0	0	9
P444	0	0	0	0	0	0	3	3
T444	0	0	0	0	0	0	3	3
T17	0	0	0	0	2	0	0	2
P92	0	0	0	0	2	0	0	2
T92	0	0	0	0	2	0	0	2
P515	0	0	0	0	2	0	0	2
T515	0	0	0	0	2	0	0	2
T55	0	1	0	8	0	0	0	9
P245	0	0	25	0	0	0	0	24
P1033	0	0	25	0	0	0	0	24
S419	0	2	11	8	0	0	0	21
P521	0	1	0	8	0	0	0	9
P45	0	0	11	0	0	0	0	11
P1051	0	2	6	5	0	0	0	13
P79	0	0	0	8	2	0	3	13
P24	0	0	0	0	0	0	3	3
P373	0	0	0	0	0	0	0	0
P1257	0	0	0	0	0	0	0	0

## Sheet: Table S3
Table S3. Corresponding matrix of the DNA distances.
Phages	P1051	T92	P92	P24	T17	P515	P444	T55	P1257	P1033	T444	P1245	P373	P45	T515	P79	P245	P521	T1245
P1051	0	1	1	0.405585	1	1	0.372583	1	0.000539989	0.235108	1	1	0.405585	1	1	1	1	1	1
T92	1	0	4.76906e-05	1	0.0182099	0.00209689	1	0.053383	1	1	0.0518224	0.0536708	1	0.0544222	0.017855	1	1	0.0526539	0.0535266
P92	1	4.76906e-05	0	1	0.0182342	0.00211856	1	0.053465	1	1	0.051842	0.0536915	1	0.0545067	0.017867	1	1	0.0527341	0.0535678
P24	0.405585	1	1	0	1	1	0.000720777	1	0.405585	0.35328	1	1	0.273629	1	1	0.00925353	1	1	1
T17	1	0.0182099	0.0182342	1	0	0.0184597	1	0.0448917	1	1	0.0407935	0.0429247	1	0.0440624	0.00052276	1	1	0.0515886	0.042776
P515	1	0.00209689	0.00211856	1	0.0184597	0	1	0.0532196	1	1	0.0517443	0.053383	1	0.054655	0.0181252	1	1	0.052694	0.05324
P444	0.372583	1	1	0.000720777	1	1	0	1	0.372583	0.405585	1	1	0.273629	1	1	0.00969064	1	1	1
T55	1	0.053383	0.053465	1	0.0448917	0.0532196	1	0	1	1	0.0153257	0.00661097	1	0.0205724	0.0448284	1	1	0.0464672	0.00643725
P1257	0.000539989	1	1	0.405585	1	1	0.372583	1	0	0.235108	1	1	0.154223	1	1	1	1	1	1
P1033	0.235108	1	1	0.35328	1	1	0.405585	1	0.235108	0	1	1	0.372583	0.273629	1	1	0.0312148	1	1
T444	1	0.0518224	0.051842	1	0.0407935	0.0517443	1	0.0153257	1	1	0	0.0129198	1	0.0191686	0.0408631	1	1	0.0526138	0.0127245
P1245	1	0.0536708	0.0536915	1	0.0429247	0.053383	1	0.00661097	1	1	0.0129198	0	1	0.0196725	0.04288	1	1	0.0456942	0.000189217
P373	0.405585	1	1	0.273629	1	1	0.273629	1	0.154223	0.372583	1	1	0	1	1	1	1	1	1
P45	1	0.0544222	0.0545067	1	0.0440624	0.054655	1	0.0205724	1	0.273629	0.0191686	0.0196725	1	0	0.0440316	1	1	0.0510109	0.0196082
T515	1	0.017855	0.017867	1	0.00052276	0.0181252	1	0.0448284	1	1	0.0408631	0.04288	1	0.0440316	0	1	1	0.051608	0.0427168
P79	1	1	1	0.00925353	1	1	0.00969064	1	1	1	1	1	1	1	1	0	1	1	1
P245	1	1	1	1	1	1	1	1	1	0.0312148	1	1	1	1	1	1	0	1	1
P521	1	0.0526539	0.0527341	1	0.0515886	0.052694	1	0.0464672	1	1	0.0526138	0.0456942	1	0.0510109	0.051608	1	1	0	0.0455159
T1245	1	0.0535266	0.0535678	1	0.042776	0.05324	1	0.00643725	1	1	0.0127245	0.000189217	1	0.0196082	0.0427168	1	1	0.0455159	0

## Sheet: Table S4
Table S4. A tab-delimited matrix of MASH distances between each pair of isolates.
Phages	SWH_Ab_1	Mokit	Maestro	vB_AbaM_Acibel004	vB_AbaP_APK14	Abraxas	AB3	vB_AbaP_APK128	IME200	BS46	vB_AbaM_D22	vB_AbaS_D0	AbTZA1	45_TS	Aristophanes	phiAB1	vB_ApiM_fHyAci03	373_TS	vB_AbaM_B09_Aci02_2	vB_AbaM_phiAbaA1	Abp9	Abp1	vB_AbaP_46_62_Aci07	vB_AbaP_APK81	Bestia	vB_AbaP_APK93	vB_ApiP_P2	Petty	vB_AbaP_AS11	133	vB_AbaP_D2	vB_AbaA_fBenAci002	T444_TS	vB_AbaP_Alexa	Berthold	Stupor	IME_AB2	vB_AbaA_fBenAci003	T17_TS	vB_AbaP_PD_AB9	AB1	521_TS	SH_Ab_15519	vB_AbaP_PMK34	VB_ApiP_XC38	Morttis	phiAC_1	1051_TS	AM101
SWH_Ab_1	0	1	1	1	0.0562192	1	0.0644877	0.0555153	0.0475673	1	1	1	1	0.0480878	0.35328	0.0449711	1	1	1	1	1	0.0331825	0.0627124	0.0441863	1	0.0439391	0.0555807	0.339586	0.0505181	1	0.0443729	0.0607916	0.0486344	1	1	1	1	0.0623675	0.051842	0.0380652	1	0.0534445	0.0364907	0.0476018	1	1	1	1	1
Mokit	1	0	0.0172657	1	1	0.147304	1	1	1	1	1	1	0.0245572	1	1	1	0.152843	1	1	1	1	1	1	1	1	1	1	1	1	0.328965	1	1	1	1	0.144391	0.14999	1	1	1	1	1	1	1	1	1	0.0172541	1	1	0.132255
Maestro	1	0.0172657	0	1	1	0.158373	1	1	1	1	1	1	0.0223628	1	1	1	0.155645	1	1	1	1	1	1	1	1	1	1	1	1	0.312952	1	1	1	1	0.150417	0.155405	1	1	1	1	1	1	1	1	1	4.05279e-05	1	1	0.134464
vB_AbaM_Acibel004	1	1	1	0	1	1	1	1	1	1	0.273629	1	1	1	1	1	1	1	0.263022	0.300994	1	1	1	1	0.372583	1	1	1	1	1	1	1	1	1	1	1	1	1	1	1	1	1	1	1	1	1	1	1	1
vB_AbaP_APK14	0.0562192	1	1	1	0	1	0.059185	0.0457919	0.0486167	1	1	1	1	0.0529962	0.339586	0.0514916	1	0.405585	1	1	1	0.0509156	0.0610453	0.0457756	1	0.046136	0.055104	0.328965	0.0491903	1	0.0532808	0.053057	0.0522356	1	1	1	1	0.0592092	0.0520973	0.054549	1	0.0433749	0.0546126	0.0481578	1	1	1	1	1
Abraxas	1	0.147304	0.158373	1	1	0	1	1	1	1	1	1	0.146312	1	1	1	0.0184047	1	1	1	1	1	1	1	1	1	1	1	1	0.372583	1	1	1	1	0.015943	0.00925753	1	1	1	1	1	1	1	1	1	0.158373	1	1	0.0180048
AB3	0.0644877	1	1	1	0.059185	1	0	0.0573712	0.0605899	1	1	1	1	0.0601651	0.320287	0.0643201	1	1	1	1	0.372583	0.0587288	0.0699663	0.0562415	1	0.0580435	0.0627124	0.306598	0.059819	1	0.0520579	0.0677018	0.0604895	0.405585	1	1	0.405585	0.0606906	0.0561083	0.0608422	0.372583	0.062262	0.0647122	0.0546976	1	1	1	1	1
vB_AbaP_APK128	0.0555153	1	1	1	0.0457919	1	0.0573712	0	0.0469534	1	1	1	1	0.0531382	0.35328	0.0477399	1	1	1	1	1	0.0510109	0.0598929	0.0487056	1	0.0482983	0.056847	0.328965	0.0493171	1	0.0544644	0.0562192	0.0518029	1	1	1	1	0.0597944	0.0515497	0.0549752	1	0.0461525	0.0547188	0.0481578	1	1	1	1	1
IME200	0.0475673	1	1	1	0.0486167	1	0.0605899	0.0469534	0	1	1	1	1	0.0483688	0.339586	0.0485457	1	1	1	1	1	0.0447494	0.0608169	0.0279198	1	0.0286154	0.0566215	0.320287	0.046384	1	0.0490639	0.0536502	0.0486522	1	1	1	1	0.0636302	0.0523943	0.049082	1	0.0471738	0.0434203	0.045743	1	1	1	1	1
BS46	1	1	1	1	1	1	1	1	1	0	1	1	1	1	1	1	1	0.209345	1	1	0.276697	1	1	1	0.300994	1	1	1	1	1	1	1	1	0.405585	1	1	0.283502	1	1	1	0.312952	1	1	1	1	1	1	1	1
vB_AbaM_D22	1	1	1	0.273629	1	1	1	1	1	1	0	1	1	1	1	1	1	1	0.142547	0.165848	1	1	1	1	1	1	1	1	1	1	1	1	1	1	1	1	1	1	1	1	1	1	1	1	1	1	1	1	1
vB_AbaS_D0	1	1	1	1	1	1	1	1	1	1	1	0	1	1	1	1	1	1	1	1	1	1	1	1	1	1	1	1	1	1	1	1	1	1	1	1	1	1	1	1	1	1	1	1	1	1	1	1	1
AbTZA1	1	0.0245572	0.0223628	1	1	0.146312	1	1	1	1	1	1	0	1	1	1	0.143644	1	1	1	1	1	1	1	1	1	1	1	1	0.339586	1	1	1	1	0.140086	0.145341	1	1	1	1	1	1	1	1	1	0.0223628	1	1	0.126215
45_TS	0.0480878	1	1	1	0.0529962	1	0.0601651	0.0531382	0.0483688	1	1	1	1	0	0.372583	0.0351336	1	1	1	1	1	0.0435112	0.0610962	0.0491541	1	0.0490099	0.0566215	0.320287	0.0533421	1	0.0487413	0.054655	0.0191686	0.405585	1	1	1	0.0616097	0.0440624	0.0482632	1	0.0510109	0.0464339	0.0513756	1	1	1	1	1
Aristophanes	0.35328	1	1	1	0.339586	1	0.320287	0.35328	0.339586	1	1	1	1	0.372583	0	0.328965	1	1	1	1	1	0.35328	0.405585	0.328965	1	0.328965	0.372583	0.35328	0.339586	1	0.405585	0.339586	0.372583	1	1	1	1	0.405585	0.405585	0.405585	1	0.312952	0.405585	0.328965	1	1	1	1	1
phiAB1	0.0449711	1	1	1	0.0514916	1	0.0643201	0.0477399	0.0485457	1	1	1	1	0.0351336	0.328965	0	1	1	1	0.405585	1	0.0380652	0.0596962	0.047276	1	0.0493171	0.0542748	0.328965	0.0485279	1	0.0465839	0.0563082	0.0363462	0.405585	1	1	1	0.0605899	0.0516858	0.043149	1	0.0487591	0.041726	0.0520579	1	1	1	1	1
vB_ApiM_fHyAci03	1	0.152843	0.155645	1	1	0.0184047	1	1	1	1	1	1	0.143644	1	1	1	0	1	1	1	1	1	1	1	1	1	1	1	1	0.372583	1	1	1	1	0.018601	0.0188115	1	1	1	1	1	1	1	1	1	0.155645	1	1	0.0188488
373_TS	1	1	1	1	0.405585	1	1	1	1	0.209345	1	1	1	1	1	1	1	0	1	1	0.339586	0.405585	1	1	0.260703	1	1	1	1	1	1	1	1	1	1	1	0.372583	1	1	1	0.328965	1	1	1	1	1	1	0.405585	1
vB_AbaM_B09_Aci02_2	1	1	1	0.263022	1	1	1	1	1	1	0.142547	1	1	1	1	1	1	1	0	0.129876	1	1	1	1	1	1	1	1	1	1	1	1	1	1	1	1	1	1	1	1	1	1	1	1	1	1	1	1	1
vB_AbaM_phiAbaA1	1	1	1	0.300994	1	1	1	1	1	1	0.165848	1	1	1	1	0.405585	1	1	0.129876	0	1	1	1	1	1	1	1	1	1	1	1	1	1	1	1	1	1	1	1	1	1	1	1	1	1	1	1	1	1
Abp9	1	1	1	1	1	1	0.372583	1	1	0.276697	1	1	1	1	1	1	1	0.339586	1	1	0	0.339586	1	1	0.300994	1	1	1	1	1	0.35328	1	1	1	1	1	0.0738179	1	1	1	0.104571	1	1	1	1	1	0.232543	1	1
Abp1	0.0331825	1	1	1	0.0509156	1	0.0587288	0.0510109	0.0447494	1	1	1	1	0.0435112	0.35328	0.0380652	1	0.405585	1	1	0.339586	0	0.0618172	0.0451144	0.405585	0.0436939	0.0554283	0.320287	0.046235	1	0.0437703	0.0543379	0.0454352	1	1	1	0.168002	0.0630068	0.0544222	0.040475	0.339586	0.0489022	0.035342	0.0476362	1	1	1	1	1
vB_AbaP_46_62_Aci07	0.0627124	1	1	1	0.0610453	1	0.0699663	0.0598929	0.0608169	1	1	1	1	0.0610962	0.405585	0.0596962	1	1	1	1	1	0.0618172	0	0.0612495	1	0.0593546	0.0611217	0.328965	0.0583963	1	0.0607663	0.0633037	0.0604645	1	1	1	1	0.0646278	0.0585147	0.0601155	1	0.0621831	0.0607158	0.0614549	1	1	1	1	1
vB_AbaP_APK81	0.0441863	1	1	1	0.0457756	1	0.0562415	0.0487056	0.0279198	1	1	1	1	0.0491541	0.328965	0.047276	1	1	1	1	1	0.0451144	0.0612495	0	1	0.0215835	0.0543379	0.339586	0.0468859	1	0.045743	0.053383	0.0474985	1	1	1	1	0.0604645	0.0510874	0.0513756	1	0.0460702	0.0463674	0.0410871	1	1	1	1	1
Bestia	1	1	1	0.372583	1	1	1	1	1	0.300994	1	1	1	1	1	1	1	0.260703	1	1	0.300994	0.405585	1	1	0	1	0.339586	1	1	1	0.405585	0.405585	1	1	1	1	0.339586	1	1	1	0.320287	1	1	1	1	1	1	0.405585	1
vB_AbaP_APK93	0.0439391	1	1	1	0.046136	1	0.0580435	0.0482983	0.0286154	1	1	1	1	0.0490099	0.328965	0.0493171	1	1	1	1	1	0.0436939	0.0593546	0.0215835	1	0	0.0540236	0.320287	0.0451623	1	0.0480529	0.0535266	0.0474814	1	1	1	1	0.0596717	0.0517638	0.0481578	1	0.0461689	0.043119	0.0430292	1	1	1	1	1
vB_ApiP_P2	0.0555807	1	1	1	0.055104	1	0.0627124	0.056847	0.0566215	1	1	1	1	0.0566215	0.372583	0.0542748	1	1	1	1	1	0.0554283	0.0611217	0.0543379	0.339586	0.0540236	0	0.328965	0.0534035	1	0.0554066	0.0611983	0.0538987	1	1	1	1	0.0611472	0.056644	0.0535061	0.197292	0.0589922	0.0547614	0.0541071	1	1	1	1	1
Petty	0.339586	1	1	1	0.328965	1	0.306598	0.328965	0.320287	1	1	1	1	0.320287	0.35328	0.328965	1	1	1	1	1	0.320287	0.328965	0.339586	1	0.320287	0.328965	0	0.312952	1	0.339586	0.35328	0.320287	1	1	1	1	0.328965	0.339586	0.405585	1	0.339586	0.405585	0.320287	1	1	1	1	1
vB_AbaP_AS11	0.0505181	1	1	1	0.0491903	1	0.059819	0.0493171	0.046384	1	1	1	1	0.0533421	0.339586	0.0485279	1	1	1	1	1	0.046235	0.0583963	0.0468859	1	0.0451623	0.0534035	0.312952	0	1	0.051842	0.0551687	0.0509346	1	1	1	1	0.0597698	0.0528548	0.0481929	1	0.0469365	0.0494991	0.0492083	1	1	1	1	1
133	1	0.328965	0.312952	1	1	0.372583	1	1	1	1	1	1	0.339586	1	1	1	0.372583	1	1	1	1	1	1	1	1	1	1	1	1	0	1	1	1	1	0.339586	0.372583	1	1	1	1	1	1	1	1	1	0.312952	1	1	0.405585
vB_AbaP_D2	0.0443729	1	1	1	0.0532808	1	0.0520579	0.0544644	0.0490639	1	1	1	1	0.0487413	0.405585	0.0465839	1	1	1	1	0.35328	0.0437703	0.0607663	0.045743	0.405585	0.0480529	0.0554066	0.339586	0.051842	1	0	0.0590403	0.0489022	1	1	1	1	0.0573253	0.0554283	0.0449711	0.372583	0.056197	0.0412986	0.0386695	1	1	1	1	1
vB_AbaA_fBenAci002	0.0607916	1	1	1	0.053057	1	0.0677018	0.0562192	0.0536502	1	1	1	1	0.054655	0.339586	0.0563082	1	1	1	1	1	0.0543379	0.0633037	0.053383	0.405585	0.0535266	0.0611983	0.35328	0.0551687	1	0.0590403	0	0.0547614	1	1	1	0.372583	0.0666486	0.0593789	0.0574401	1	0.0531382	0.0602397	0.0586811	1	1	1	1	1
T444_TS	0.0486344	1	1	1	0.0522356	1	0.0604895	0.0518029	0.0486522	1	1	1	1	0.0191686	0.372583	0.0363462	1	1	1	1	1	0.0454352	0.0604645	0.0474985	1	0.0474814	0.0538987	0.320287	0.0509346	1	0.0489022	0.0547614	0	0.405585	1	1	1	0.0596227	0.0407935	0.0467178	1	0.0526138	0.0446706	0.0506124	1	1	1	1	1
vB_AbaP_Alexa	1	1	1	1	1	1	0.405585	1	1	0.405585	1	1	1	0.405585	1	0.405585	1	1	1	1	1	1	1	1	1	1	1	1	1	1	1	1	0.405585	0	1	1	1	1	0.405585	1	0.405585	1	1	1	1	1	1	1	1
Berthold	1	0.144391	0.150417	1	1	0.015943	1	1	1	1	1	1	0.140086	1	1	1	0.018601	1	1	1	1	1	1	1	1	1	1	1	1	0.339586	1	1	1	1	0	0.0173941	1	1	1	1	1	1	1	1	1	0.150417	1	1	0.0155889
Stupor	1	0.14999	0.155405	1	1	0.00925753	1	1	1	1	1	1	0.145341	1	1	1	0.0188115	1	1	1	1	1	1	1	1	1	1	1	1	0.372583	1	1	1	1	0.0173941	0	1	1	1	1	1	1	1	1	1	0.155405	1	1	0.0177122
IME_AB2	1	1	1	1	1	1	0.405585	1	1	0.283502	1	1	1	1	1	1	1	0.372583	1	1	0.0738179	0.168002	1	1	0.339586	1	1	1	1	1	1	0.372583	1	1	1	1	0	1	1	1	0.0881091	1	1	1	1	1	0.23782	1	1
vB_AbaA_fBenAci003	0.0623675	1	1	1	0.0592092	1	0.0606906	0.0597944	0.0636302	1	1	1	1	0.0616097	0.405585	0.0605899	1	1	1	1	1	0.0630068	0.0646278	0.0604645	1	0.0596717	0.0611472	0.328965	0.0597698	1	0.0573253	0.0666486	0.0596227	1	1	1	1	0	0.0604394	0.0600411	1	0.0609944	0.0603644	0.0613521	1	1	1	1	1
T17_TS	0.051842	1	1	1	0.0520973	1	0.0561083	0.0515497	0.0523943	1	1	1	1	0.0440624	0.405585	0.0516858	1	1	1	1	1	0.0544222	0.0585147	0.0510874	1	0.0517638	0.056644	0.339586	0.0528548	1	0.0554283	0.0593789	0.0407935	0.405585	1	1	1	0.0604394	0	0.0529154	1	0.0515886	0.0525338	0.056983	1	1	1	1	1
vB_AbaP_PD_AB9	0.0380652	1	1	1	0.054549	1	0.0608422	0.0549752	0.049082	1	1	1	1	0.0482632	0.405585	0.043149	1	1	1	1	1	0.040475	0.0601155	0.0513756	1	0.0481578	0.0535061	0.405585	0.0481929	1	0.0449711	0.0574401	0.0467178	1	1	1	1	0.0600411	0.0529154	0	1	0.0542958	0.0219347	0.054655	1	1	1	1	1
AB1	1	1	1	1	1	1	0.372583	1	1	0.312952	1	1	1	1	1	1	1	0.328965	1	1	0.104571	0.339586	1	1	0.320287	1	0.197292	1	1	1	0.372583	1	1	0.405585	1	1	0.0881091	1	1	1	0	1	1	1	1	1	0.214163	1	1
521_TS	0.0534445	1	1	1	0.0433749	1	0.062262	0.0461525	0.0471738	1	1	1	1	0.0510109	0.312952	0.0487591	1	1	1	1	1	0.0489022	0.0621831	0.0460702	1	0.0461689	0.0589922	0.339586	0.0469365	1	0.056197	0.0531382	0.0526138	1	1	1	1	0.0609944	0.0515886	0.0542958	1	0	0.053383	0.0503305	1	1	1	1	1
SH_Ab_15519	0.0364907	1	1	1	0.0546126	1	0.0647122	0.0547188	0.0434203	1	1	1	1	0.0464339	0.405585	0.041726	1	1	1	1	1	0.035342	0.0607158	0.0463674	1	0.043119	0.0547614	0.405585	0.0494991	1	0.0412986	0.0602397	0.0446706	1	1	1	1	0.0603644	0.0525338	0.0219347	1	0.053383	0	0.0495538	1	1	1	1	1
vB_AbaP_PMK34	0.0476018	1	1	1	0.0481578	1	0.0546976	0.0481578	0.045743	1	1	1	1	0.0513756	0.328965	0.0520579	1	1	1	1	1	0.0476362	0.0614549	0.0410871	1	0.0430292	0.0541071	0.320287	0.0492083	1	0.0386695	0.0586811	0.0506124	1	1	1	1	0.0613521	0.056983	0.054655	1	0.0503305	0.0495538	0	1	1	1	1	1
VB_ApiP_XC38	1	1	1	1	1	1	1	1	1	1	1	1	1	1	1	1	1	1	1	1	1	1	1	1	1	1	1	1	1	1	1	1	1	1	1	1	1	1	1	1	1	1	1	1	0	1	1	1	1
Morttis	1	0.0172541	4.05279e-05	1	1	0.158373	1	1	1	1	1	1	0.0223628	1	1	1	0.155645	1	1	1	1	1	1	1	1	1	1	1	1	0.312952	1	1	1	1	0.150417	0.155405	1	1	1	1	1	1	1	1	1	0	1	1	0.134464
phiAC_1	1	1	1	1	1	1	1	1	1	1	1	1	1	1	1	1	1	1	1	1	0.232543	1	1	1	1	1	1	1	1	1	1	1	1	1	1	1	0.23782	1	1	1	0.214163	1	1	1	1	1	0	1	1
1051_TS	1	1	1	1	1	1	1	1	1	1	1	1	1	1	1	1	1	0.405585	1	1	1	1	1	1	0.405585	1	1	1	1	1	1	1	1	1	1	1	1	1	1	1	1	1	1	1	1	1	1	0	1
AM101	1	0.132255	0.134464	1	1	0.0180048	1	1	1	1	1	1	0.126215	1	1	1	0.0188488	1	1	1	1	1	1	1	1	1	1	1	1	0.405585	1	1	1	1	0.0155889	0.0177122	1	1	1	1	1	1	1	1	1	0.134464	1	1	0
AbTJ	1	1	1	1	1	1	1	1	1	0.372583	1	1	1	1	1	1	1	0.372583	1	1	0.217673	1	1	1	0.35328	1	1	1	1	1	1	1	1	1	1	1	0.214163	1	1	1	0.372583	1	1	1	1	1	1	0.256381	1
ABPH49	1	1	1	1	1	1	1	1	1	1	1	1	1	1	1	1	1	1	1	1	1	1	1	1	1	1	1	1	1	1	1	1	1	1	1	1	1	1	1	1	1	1	1	1	1	1	1	1	1
245_TS	1	1	1	1	1	1	1	1	1	1	1	1	1	1	1	1	1	1	1	1	1	1	1	1	1	1	1	1	1	1	1	1	1	1	1	1	1	1	1	1	1	1	1	1	1	1	1	1	1
Lazarus	1	0.153758	0.151066	1	1	0.017482	1	1	1	1	1	1	0.14183	1	1	1	0.0187494	1	1	1	1	1	1	1	1	1	1	1	1	0.35328	1	1	1	1	0.0168676	0.0186627	1	1	1	1	1	1	1	1	1	0.151285	1	1	0.0181554
79_TS	1	0.135226	0.138079	1	1	0.0181313	1	1	1	1	1	1	0.126089	1	1	1	0.0177597	1	1	1	1	1	1	1	1	1	1	1	1	0.339586	1	1	1	1	0.0174644	0.0174761	1	1	1	1	1	1	1	1	1	0.138079	1	1	0.015113
vB_ApiP_P1	0.0597453	1	1	1	0.0516274	1	0.0576247	0.0527743	0.0559977	1	1	1	1	0.0579967	0.35328	0.0580201	1	1	1	0.405585	1	0.0545914	0.062846	0.0545278	1	0.0535472	0.0413128	0.328965	0.0532808	1	0.0558655	0.0613007	0.0562637	1	1	1	1	0.064825	0.0617133	0.0561305	1	0.0541908	0.0553416	0.0501626	1	1	1	1	1
Meroveus	1	0.151725	0.162098	1	1	0.0159046	1	1	1	1	1	1	0.149146	1	1	1	0.0208145	1	1	1	1	1	1	1	1	1	1	1	1	0.372583	1	1	1	1	0.0188675	0.0168276	1	1	1	1	1	1	1	1	1	0.162098	1	1	0.0194927
WCHABP12	1	1	1	1	1	1	0.405585	1	1	0.219531	1	1	1	0.405585	1	1	1	0.300994	1	1	0.0275742	0.291447	1	1	0.339586	1	1	1	1	1	1	1	1	1	1	1	0.103071	1	1	1	0.106444	1	1	1	1	1	0.239237	0.405585	1
Ab105_1phi	1	1	1	1	1	1	1	1	1	0.372583	1	1	1	1	1	1	1	0.372583	1	1	0.215885	1	1	1	0.35328	1	1	1	1	1	1	1	1	1	1	1	0.215016	1	1	1	0.372583	1	1	1	1	1	1	0.256381	1
vB_AbaM_PhT2	1	0.0305294	0.0300431	1	1	0.150633	1	1	1	1	1	1	0.0273375	1	1	1	0.147707	1	1	1	1	1	1	1	1	1	1	1	1	0.320287	1	1	1	1	0.135689	0.145921	1	1	1	1	1	1	1	1	1	0.030072	1	1	0.129065
1033_TS	1	1	1	1	1	1	1	1	1	0.339586	1	1	1	0.273629	1	1	1	0.372583	1	1	0.247037	1	1	1	0.372583	1	1	1	1	1	1	1	1	1	1	1	0.248764	1	1	1	0.372583	1	1	1	1	1	1	0.235108	1
53	1	1	1	1	1	1	1	1	1	1	1	1	1	1	1	1	1	1	1	1	1	1	1	1	1	1	1	1	1	1	1	1	1	1	1	1	1	1	1	1	1	1	1	1	1	1	1	1	1
P92_TS	0.0576941	1	1	1	0.0512024	1	0.052976	0.0492989	0.0516663	1	1	1	1	0.0545067	0.328965	0.0565093	1	1	1	1	1	0.0558215	0.0618953	0.0501254	0.312952	0.0514529	0.0576016	0.339586	0.0487056	1	0.0561083	0.061558	0.051842	0.405585	1	1	1	0.061558	0.0182342	0.0570057	1	0.0527341	0.0585147	0.0542328	1	1	1	1	1
PBAB25	1	1	1	1	1	1	1	1	1	1	1	0.0154757	1	1	1	1	1	1	1	1	1	1	1	1	1	1	1	1	1	1	1	1	1	1	1	1	1	1	1	1	1	1	1	1	1	1	1	1	1
vB_AbaM_IME512	1	1	1	1	1	1	1	1	1	0.276697	1	1	1	1	1	1	1	0.291447	1	1	0.026879	0.405585	1	1	0.328965	1	1	1	1	1	1	0.372583	1	1	1	1	0.0638221	1	1	1	0.101126	1	1	1	1	1	0.236445	1	1
Bphi_R1888	1	1	1	1	1	1	0.372583	0.372583	1	0.295981	1	1	1	0.405585	1	1	1	0.339586	1	1	0.0752053	0.339586	1	1	0.295981	1	1	1	1	1	0.339586	0.328965	1	1	1	1	0.0298701	1	1	1	0.0897357	1	1	1	1	1	0.239237	1	1
Ab_SZ3	1	1	1	1	1	1	1	1	1	1	1	0.0288451	1	1	1	1	1	1	1	1	1	1	1	1	1	1	1	1	1	1	1	1	1	1	1	1	1	1	1	1	1	1	1	1	1	1	1	1	1
vB_AbaP_IME546	0.0483512	1	1	1	0.0537121	1	0.0630606	0.053383	0.0514916	1	1	1	1	0.0509156	0.405585	0.0456293	1	1	1	1	1	0.0452905	0.0591126	0.0495904	0.312952	0.0502185	0.0519007	0.405585	0.0497739	1	0.0257703	0.0570512	0.0511256	1	1	1	1	0.0594032	0.0554501	0.0445763	1	0.0533217	0.0425102	0.0543168	1	1	1	1	1
vB_AbaP_APK87	0.0630068	1	1	1	0.0564645	1	0.0615839	0.0580201	0.056847	1	1	1	1	0.0574171	0.306598	0.0589682	1	1	1	1	1	0.0583018	0.064015	0.0549966	0.372583	0.0574401	0.0379635	0.320287	0.054149	1	0.0599422	0.0646278	0.0582077	1	1	1	1	0.0647122	0.0629531	0.0598683	1	0.0587765	0.0598436	0.0565541	1	1	1	1	1
vB_AbaP_AS12	0.056064	1	1	1	0.0474814	1	0.0644877	0.0485634	0.0489381	1	1	1	1	0.0526739	0.35328	0.0499399	1	1	1	1	1	0.0512408	0.060969	0.0512024	1	0.0489381	0.0584436	0.320287	0.0433145	1	0.0568923	0.0560198	0.0538779	1	1	1	1	0.0662355	0.0561526	0.0556025	1	0.0440624	0.054549	0.0542958	1	1	1	1	1
vB_AbaP_APK48	0.0572795	1	1	1	0.0535266	1	0.0560198	0.0487949	0.0555807	1	0.405585	1	1	0.0597453	0.35328	0.057671	1	1	1	1	1	0.0551256	0.0629531	0.0560198	0.312952	0.0568696	0.0551902	0.328965	0.0495904	1	0.0545702	0.0641257	0.0590162	1	1	1	1	0.0613521	0.0567115	0.0545067	1	0.0595738	0.0545914	0.0574401	1	1	1	1	1
vB_AbaP_APK48_3	0.0519792	1	1	1	0.044592	1	0.0558435	0.0354933	0.0446706	1	1	1	1	0.0516469	0.312952	0.0481929	1	1	1	1	1	0.0467849	0.0585621	0.0434809	1	0.044047	0.0558875	0.328965	0.0468017	1	0.0511256	0.0548681	0.05324	1	1	1	1	0.0588483	0.0515304	0.0517443	1	0.0425396	0.0510682	0.0471568	1	1	1	1	1
WCHABP5	0.0495721	1	1	1	0.0554066	1	0.0609944	0.0541699	0.0494444	1	1	1	1	0.0489022	0.320287	0.0456293	1	1	1	1	0.35328	0.0387215	0.0622357	0.0505558	0.405585	0.0493171	0.056689	1	0.0504618	1	0.0289561	0.0581372	0.04867	1	1	1	1	0.0622357	0.0532808	0.0409749	0.372583	0.0527743	0.0362382	0.0493352	1	1	1	1	1
Octan	1	0.15399	0.163791	1	1	0.0162582	1	1	1	1	1	1	0.150849	1	1	1	0.020326	1	1	1	1	1	1	1	1	1	1	1	1	0.372583	1	1	1	1	0.0193714	0.0169996	1	1	1	1	1	1	1	1	1	0.163791	1	1	0.0201807
fLi_Aba03	1	1	1	1	1	1	1	1	1	1	1	1	1	1	1	1	1	1	1	1	0.35328	1	1	1	1	1	1	1	1	1	1	1	1	1	1	1	0.35328	1	1	1	1	1	1	1	1	1	1	0.372583	1
vB_AbaP_APK2_2	0.0447494	1	1	1	0.0460209	1	0.0585384	0.0483688	0.0295368	1	1	1	1	0.0493171	0.328965	0.0488127	1	1	1	1	1	0.0440934	0.0596227	0.0193079	1	0.0031351	0.0536708	0.328965	0.0436786	1	0.0475673	0.052714	0.047619	1	1	1	1	0.0596472	0.0518811	0.0486522	1	0.0467681	0.0440007	0.0439391	1	1	1	1	1
Henu6	1	0.224525	0.218593	1	1	0.186292	1	1	1	1	1	1	0.206387	1	1	1	0.193331	1	1	1	1	1	1	1	1	1	1	1	1	0.312952	1	1	1	1	0.196126	0.196705	1	1	1	1	1	1	1	1	1	0.218593	1	0.405585	0.215885
vB_AbaA_fBenAci001	0.0538364	1	1	1	0.050014	1	0.0557338	0.0507257	0.050669	1	1	1	1	0.0536502	0.405585	0.0521368	1	1	1	1	1	0.050144	0.0594519	0.0484748	1	0.0491722	0.0537121	0.312952	0.0486344	1	0.052976	0.05438	0.05324	1	1	1	1	0.0605397	0.0561305	0.0488485	1	0.0522752	0.0517443	0.046634	1	1	1	1	1
AP22	1	1	1	1	0.405585	1	1	0.405585	1	0.306598	1	1	1	0.372583	1	1	1	0.35328	1	1	0.0820981	0.312952	1	1	0.339586	1	1	1	1	1	0.372583	0.35328	1	1	1	1	0.109161	1	1	1	0.0987984	1	1	1	1	1	0.23011	1	1
T55_TS	0.0484394	1	1	1	0.0529558	1	0.0605146	0.0531382	0.0502185	1	1	1	1	0.0205724	0.372583	0.0368919	1	1	1	1	1	0.0457593	0.0607916	0.0472589	1	0.0485102	0.0547401	0.328965	0.050014	1	0.0499769	0.0532196	0.0153257	0.405585	1	1	1	0.0606402	0.0448917	0.0459717	1	0.0464672	0.044987	0.0525538	1	1	1	1	1
P515_TS	0.0577637	1	1	1	0.0510109	1	0.0531586	0.0491361	0.052295	1	1	1	1	0.054655	0.328965	0.0564421	1	1	1	1	1	0.0555153	0.0614034	0.0501254	0.312952	0.0514142	0.0571195	0.339586	0.0484748	1	0.0563751	0.0613777	0.0517443	0.405585	1	1	1	0.062262	0.0184597	0.0563305	1	0.052694	0.0582783	0.0543168	1	1	1	1	1
vB_AbaP_APK116	0.0602646	1	1	1	0.0470888	1	0.0577405	0.0424514	0.0506312	1	1	1	1	0.0543589	0.328965	0.0532808	1	1	1	1	1	0.0538364	0.0611983	0.0489381	1	0.0489381	0.0596227	0.312952	0.0509346	1	0.0564421	0.0563528	0.0530368	1	1	1	1	0.0574171	0.0545067	0.0559316	0.372583	0.0468691	0.0569376	0.0514336	1	1	1	1	1
Ab_121	1	1	1	0.26546	1	1	1	1	1	1	0.143276	1	1	1	1	1	1	1	0.0202533	0.126089	1	1	1	1	1	1	1	1	1	1	1	1	1	1	1	1	1	1	1	1	1	1	1	1	1	1	1	1	1
KARL_1	1	0.152392	0.154223	1	1	0.0154865	1	1	1	1	1	1	0.149356	1	1	1	0.0195825	1	1	1	1	1	1	1	1	1	1	1	1	0.35328	1	1	1	1	0.0189925	0.0172482	1	1	1	1	1	1	1	1	1	0.154223	1	1	0.0213544
Minot	1	0.000254404	0.0173531	1	1	0.146905	1	1	1	1	1	1	0.0246043	1	1	1	0.152843	1	1	1	1	1	1	1	1	1	1	1	1	0.328965	1	1	1	1	0.143644	0.149356	1	1	1	1	1	1	1	1	1	0.0173415	1	1	0.13084
Fri1	0.052714	1	1	1	0.049627	1	0.0624468	0.052714	0.0491722	1	1	1	1	0.050144	0.405585	0.0512024	1	1	1	1	1	0.0481578	0.063685	0.0495721	1	0.0479482	0.05788	0.306598	0.0412703	1	0.0553849	0.0523744	0.0495538	1	1	1	1	0.0614549	0.0515497	0.052454	1	0.0496454	0.0538156	0.0531382	1	1	1	1	1
Ab11510_phi	1	1	1	1	1	1	1	1	1	0.372583	1	1	1	1	1	1	1	0.279978	1	1	0.35328	1	1	1	0.35328	1	1	1	1	1	1	1	1	1	1	1	0.320287	1	1	1	0.295981	1	1	1	1	1	1	0.295981	1
vB_AbaP_Acibel007	0.339586	1	1	1	0.35328	1	0.339586	0.372583	0.339586	1	1	1	1	0.35328	0.35328	0.339586	1	1	1	1	1	0.339586	0.339586	0.35328	1	0.328965	0.339586	0.306598	0.35328	1	0.372583	0.35328	0.339586	1	1	1	1	0.339586	0.339586	0.339586	1	0.339586	0.339586	0.372583	1	1	1	1	1
Melin	1	0.00421224	0.0177716	1	1	0.145534	1	1	1	1	1	1	0.0241987	1	1	1	0.151946	1	1	1	1	1	1	1	1	1	1	1	1	0.328965	1	1	1	1	0.143092	0.149356	1	1	1	1	1	1	1	1	1	0.0178014	1	1	0.130424
Acj61	1	0.291447	0.291447	1	1	0.295981	1	1	1	1	0.405585	1	0.300994	1	1	1	0.287309	1	1	0.405585	1	1	1	1	1	1	1	1	1	0.312952	1	1	1	1	0.291447	0.295981	1	1	1	1	1	1	1	1	1	0.291447	1	1	0.295981
YMC11_12_R2315	1	1	1	1	1	1	1	1	1	0.276697	1	1	1	1	1	1	1	0.276697	1	1	0.0777792	0.405585	1	1	0.339586	1	1	1	1	1	1	1	1	1	1	1	0.0296696	1	1	1	0.0936061	1	1	1	1	1	0.263022	1	1
vB_AbaP_B1	0.0507826	1	1	1	0.0542958	1	0.0629531	0.0570284	0.0510682	1	1	1	1	0.0508015	0.372583	0.0486522	1	1	1	1	1	0.0482105	0.0602397	0.0522356	1	0.052196	0.0511065	0.328965	0.041769	1	0.0466842	0.060969	0.0479656	1	1	1	1	0.0597207	0.0540653	0.0465672	1	0.056983	0.0477572	0.0525938	1	1	1	1	1
vB_AbaM_IME284	1	1	1	1	1	1	1	1	1	0.287309	1	1	1	0.372583	1	1	1	0.312952	1	1	0.0901121	0.328965	1	1	0.287309	1	1	1	1	1	0.35328	1	1	1	1	1	0.0992673	1	1	1	0.10359	1	1	1	1	1	0.236445	1	1
YMC13_03_R2096	1	1	1	0.372583	1	1	1	1	1	0.295981	1	1	1	1	1	1	1	0.339586	0.405585	0.35328	0.35328	1	1	1	0.0324377	1	1	1	1	1	1	1	1	1	1	1	0.372583	1	1	1	0.372583	1	1	0.405585	1	1	1	1	1
SH_Ab_15599	1	1	1	1	1	1	1	1	1	1	1	1	1	1	1	1	1	1	1	1	0.405585	0.405585	1	1	1	1	1	1	1	1	0.300994	1	1	1	1	1	1	1	1	1	0.405585	1	1	0.312952	1	1	0.405585	1	1
TaPaz	1	1	1	1	1	1	1	1	1	0.175137	1	1	1	1	1	1	1	0.0728267	1	1	1	1	1	1	0.405585	1	1	1	1	1	1	1	1	1	1	1	1	1	1	1	1	1	1	1	1	1	1	1	1
vB_AbaP_D2M	0.0445292	1	1	1	0.0534445	1	0.052117	0.0546763	0.0491722	1	1	1	1	0.0489381	0.405585	0.0469703	1	1	1	1	0.35328	0.0440161	0.060969	0.0458571	0.405585	0.0481228	0.0556025	0.339586	0.0519792	1	0.000247148	0.059185	0.0491903	1	1	1	1	0.0575323	0.0555807	0.0450666	0.372583	0.0563305	0.0414262	0.0389172	1	1	1	1	1
SH_Ab_15497	1	1	1	1	1	1	1	1	1	1	1	1	1	1	1	1	1	1	1	1	1	1	1	1	1	1	1	1	1	1	1	1	1	1	1	1	1	1	1	1	1	1	1	1	1	1	1	1	1
YMC_09_02_B1251	1	1	1	1	1	1	1	1	1	0.35328	1	1	1	1	1	1	1	0.372583	1	1	0.223483	1	1	1	0.35328	1	1	1	1	1	1	1	1	1	1	1	0.223483	1	1	1	0.312952	1	1	1	1	1	1	0.263022	1
vB_AbaM_B09_Aci05	1	1	1	0.26546	1	1	1	1	1	1	0.14383	1	1	1	1	1	1	1	0.0168619	0.129199	1	1	1	1	1	1	1	1	1	1	1	1	1	1	1	1	1	1	1	1	1	1	1	1	1	1	1	1	1
vB_AbaM_B09_Aci01_1	1	1	1	0.25242	1	1	1	1	1	1	0.143092	1	1	1	1	1	1	1	0.0126394	0.137915	1	1	1	1	1	1	1	1	1	1	1	1	1	1	1	1	1	1	1	1	1	1	1	1	1	1	1	1	1
vB_AbaP_APK26	0.0575323	1	1	1	0.0493352	1	0.0565093	0.0479134	0.0498661	1	1	1	1	0.0536915	1	0.0554501	1	1	1	1	1	0.0533012	0.0584436	0.0501626	1	0.050144	0.0582783	0.320287	0.0518224	1	0.0557557	0.0555807	0.0529962	1	1	1	1	0.0639598	0.0472589	0.0557119	1	0.051164	0.0564869	0.0534445	1	1	1	1	1
Kimel	1	0.15399	0.160733	1	1	0.0167024	1	1	1	1	1	1	0.148731	1	1	1	0.0200232	1	1	1	1	1	1	1	1	1	1	1	1	0.372583	1	1	1	1	0.0191812	0.0175467	1	1	1	1	1	1	1	1	1	0.161003	1	1	0.0197953
vB_AbaP_WU2001	0.0502558	1	1	1	0.0535061	1	0.0609944	0.0544644	0.0513949	1	1	1	1	0.0238757	0.35328	0.0422904	1	1	1	1	0.35328	0.0452103	0.0625794	0.0499584	0.405585	0.049118	0.0587526	0.339586	0.0537949	1	0.0425102	0.0547827	0.0192761	1	1	1	1	0.0626059	0.048228	0.0461031	0.372583	0.0537742	0.0434203	0.0460209	1	1	1	1	1
YMC_13_01_C62	1	1	1	1	1	1	1	1	1	0.276697	1	1	1	1	1	1	1	0.276697	1	1	0.0777792	0.405585	1	1	0.339586	1	1	1	1	1	1	1	1	1	1	1	0.0296031	1	1	1	0.0934886	1	1	1	1	1	0.263022	1	1
Bphi_R2919	1	1	1	1	1	1	0.372583	0.372583	1	0.276697	1	1	1	0.405585	1	1	1	0.339586	1	1	0.0758046	0.339586	1	1	0.295981	1	1	1	1	1	0.339586	0.328965	1	1	1	1	0.0298031	1	1	1	0.0885226	1	1	1	1	1	0.239237	1	1
Apostate	1	0.158119	0.162655	1	1	0.0166287	1	1	1	1	1	1	0.152843	1	1	1	0.0186751	1	1	1	1	1	1	1	1	1	1	1	1	0.405585	1	1	1	1	0.0176648	0.0174175	1	1	1	1	1	1	1	1	1	0.162655	1	1	0.0177004
fLi_Aba02	1	1	1	1	1	1	1	1	1	1	1	1	1	1	1	1	1	1	1	1	0.35328	1	1	1	1	1	1	1	1	1	1	1	1	1	1	1	0.35328	1	1	1	1	1	1	1	1	1	1	0.372583	1
YMC11_12_R1215	1	1	1	1	1	1	1	1	1	0.276697	1	1	1	1	1	1	1	0.276697	1	1	0.0777792	0.405585	1	1	0.339586	1	1	1	1	1	1	1	1	1	1	1	0.0296031	1	1	1	0.0934886	1	1	1	1	1	0.263022	1	1
TAC1	1	1	1	0.270747	1	1	1	1	1	1	0.144959	1	1	1	1	1	1	1	0.0365754	0.121798	1	1	1	1	1	1	1	1	1	1	1	1	1	1	1	1	1	1	1	1	1	1	1	1	1	1	1	1	1
Pipo	0.0582312	1	1	1	0.052474	1	0.0609436	0.0555153	0.0544855	1	1	1	1	0.0561526	0.372583	0.0558435	1	1	1	1	1	0.0533421	0.0612495	0.0519203	1	0.0549109	0.0540653	0.320287	0.0456942	1	0.0552118	0.0585859	0.0542538	1	1	1	1	0.0645717	0.0573482	0.0536089	1	0.0538571	0.0537121	0.050669	1	1	1	1	1
DMU1	1	1	1	1	1	1	1	1	1	1	1	1	1	1	1	1	1	1	1	1	1	1	1	1	1	1	1	1	1	1	1	1	1	1	1	1	1	1	1	1	1	1	1	1	1	1	1	1	1
YMC11_11_R3177	1	1	1	1	1	1	1	1	1	0.372583	1	1	0.372583	1	1	1	1	0.35328	1	1	0.224525	1	1	1	0.339586	1	1	1	1	1	1	1	1	1	1	1	0.222464	1	1	1	0.26546	1	1	1	1	1	1	0.258493	1
phiAB6	0.0475845	1	1	1	0.0550825	1	0.0638221	0.0549537	0.0520382	1	1	1	1	0.0377109	0.35328	0.0303924	1	1	1	1	1	0.041017	0.059819	0.0520382	1	0.0529154	0.0554283	0.372583	0.0508205	1	0.0443573	0.0583018	0.0387085	1	1	1	1	0.0644597	0.0520185	0.043755	1	0.0537742	0.0437703	0.0518029	1	1	1	1	1
AbP2	1	1	1	1	1	1	1	1	1	0.295981	1	1	1	0.405585	1	1	1	0.35328	1	1	0.0375228	0.306598	1	1	0.306598	1	1	1	1	1	0.405585	0.372583	1	1	1	1	0.0562637	1	1	1	0.0975515	1	1	1	1	1	0.242205	1	1
Mithridates	1	1	1	0.372583	1	1	1	1	1	0.372583	1	1	1	1	1	1	1	0.312952	1	1	0.405585	1	1	1	0.0349841	1	1	1	1	1	1	1	1	1	1	1	0.405585	1	1	1	0.35328	1	1	1	1	1	1	1	1
Ab105_2phi	1	1	1	1	1	1	1	1	1	0.320287	1	1	1	1	1	1	1	0.405585	1	1	1	1	1	1	0.372583	1	1	1	1	1	1	1	1	1	1	1	1	1	1	1	1	1	1	1	1	1	1	0.287309	1
vB_AbaS_TRS1	1	1	1	1	1	1	1	1	1	1	1	1	1	1	1	1	1	0.405585	1	1	0.35328	1	1	1	1	1	1	1	1	1	1	1	1	1	1	1	1	1	1	1	0.35328	1	1	1	1	1	1	0.306598	1
vB_AbaM_ME3	1	1	1	1	1	1	1	1	1	1	1	1	1	1	1	1	1	1	1	1	1	1	1	1	1	1	1	1	1	1	1	1	1	1	1	1	1	1	1	1	1	1	1	1	1	1	1	1	1
vB_AbaP_100	0.051608	1	1	1	0.0576016	1	0.0638771	0.056599	0.0513178	1	1	1	1	0.051511	0.339586	0.0475673	1	1	1	1	0.35328	0.0404888	0.0654229	0.0525139	0.405585	0.0515886	0.0582312	1	0.0522554	1	0.0297077	0.0606906	0.0512408	1	1	1	1	0.0639874	0.055255	0.0429098	0.372583	0.055061	0.0373234	0.0507447	1	1	1	1	1
vB_AbaP_APK44	0.0562859	1	1	1	0.0499215	1	0.058349	0.0510682	0.0528347	1	1	1	1	0.0565541	0.372583	0.0535678	1	1	1	1	1	0.0537535	0.0628192	0.0531993	1	0.0534855	0.0583963	0.306598	0.0480529	1	0.0531382	0.0605397	0.0554936	1	1	1	1	0.0580903	0.0576478	0.0538364	1	0.0550181	0.0538571	0.0548254	1	1	1	1	1
AJO1	0.339586	1	1	1	0.339586	1	0.339586	0.339586	0.328965	1	1	1	1	0.320287	0.35328	0.328965	1	1	1	1	1	0.328965	0.328965	0.35328	1	0.328965	0.328965	0.328965	0.328965	1	0.372583	0.35328	0.306598	1	1	1	1	0.328965	0.339586	0.339586	1	0.339586	0.328965	0.35328	1	1	1	1	1
Acj9	1	0.276697	0.279978	1	1	0.270747	1	1	1	1	1	1	0.287309	1	1	1	0.276697	1	1	1	1	1	1	1	1	1	1	1	1	0.312952	1	1	1	1	0.273629	0.273629	1	1	1	1	1	1	1	1	1	0.279978	1	1	0.26546
Ab124	0.038891	1	1	1	0.0526539	1	0.0574632	0.0535883	0.0426576	1	1	1	1	0.049118	1	0.0438469	1	1	1	1	1	0.030451	0.0614807	0.0455483	1	0.0423635	0.0548681	0.405585	0.0506879	1	0.0411434	0.056847	0.0484218	1	1	1	1	0.0599422	0.0561526	0.0286795	1	0.0526739	0.00970702	0.0483159	1	1	1	1	1
fEg_Aba01	1	1	1	1	1	1	1	1	1	1	1	1	1	1	1	1	1	1	1	1	0.35328	1	1	1	1	1	1	1	1	1	1	1	1	1	1	1	0.35328	1	1	1	1	1	1	1	1	1	1	0.372583	1
vB_AbaP_B3	0.050368	1	1	1	0.0559316	1	0.0626858	0.0559095	0.0506312	1	1	1	1	0.0517053	0.35328	0.047896	1	1	1	1	0.35328	0.0467178	0.0629263	0.0491361	0.405585	0.0493534	0.0526338	0.306598	0.0441088	1	0.0432091	0.0610707	0.0474814	1	1	1	1	0.0620782	0.0534445	0.0490099	0.405585	0.0560419	0.0475329	0.0484394	1	1	1	1	1
vB_AbaP_APK32	0.0568244	1	1	1	0.0539611	1	0.0637124	0.0542958	0.0547401	1	1	1	1	0.0571651	0.339586	0.0542538	1	1	1	1	1	0.0542748	0.0616874	0.0546338	0.339586	0.0530773	0.0551256	0.320287	0.0489022	1	0.055061	0.0614292	0.0563528	1	1	1	1	0.0634394	0.05788	0.0518224	1	0.0551902	0.0516469	0.0576016	1	1	1	1	1
Presley	1	1	1	1	1	1	1	1	1	1	1	1	1	1	1	1	1	1	1	1	1	1	1	1	1	1	1	1	1	1	1	1	1	1	1	1	1	1	1	1	1	1	1	1	0.328965	1	1	1	1
vB_AbaM_B9	1	1	1	1	1	1	1	1	1	0.211692	1	1	1	1	1	1	1	0.0704228	1	1	1	1	1	1	0.312952	1	1	1	1	1	1	1	1	1	1	1	1	1	1	1	1	1	1	1	1	1	1	1	1
vB_AbaM_IME285	1	1	1	1	1	1	1	0.35328	1	0.217673	1	1	1	0.405585	1	1	1	0.339586	1	1	0.0733545	0.328965	1	1	0.339586	1	1	1	1	1	0.405585	1	1	1	1	1	0.0244554	1	1	1	0.100152	1	1	1	1	1	0.231311	1	1
Ac42	1	0.320287	0.320287	1	1	0.339586	1	1	1	1	1	1	0.320287	1	1	1	0.339586	1	1	1	1	1	1	1	1	1	1	1	1	0.35328	1	1	1	1	0.35328	0.339586	1	1	1	1	1	1	1	1	1	0.320287	1	1	0.339586
vB_AbaP_APK2	0.046634	1	1	1	0.045743	1	0.0573712	0.0475157	0.0286154	1	1	1	1	0.0484394	0.328965	0.0470888	1	1	1	1	1	0.0433598	0.0597207	0.0195055	1	0.00684985	0.0547188	0.328965	0.04486	1	0.0482807	0.0527944	0.047293	1	1	1	1	0.0606906	0.0510874	0.0492083	1	0.045403	0.0445606	0.0446077	1	1	1	1	1
vB_AbaP_APK37	0.0555153	1	1	1	0.0512793	1	0.0614034	0.0467849	0.0540027	1	1	1	1	0.0567792	1	0.0538364	1	1	1	1	0.405585	0.0568018	0.0596227	0.0533012	0.328965	0.0514529	0.0561083	0.320287	0.0517248	1	0.0555807	0.0612495	0.0549109	1	1	1	1	0.0558875	0.0488306	0.0532196	0.405585	0.0535472	0.0523347	0.0574401	1	1	1	1	1
T92_TS	0.0576941	1	1	1	0.0512024	1	0.0529356	0.0492989	0.0516469	1	1	1	1	0.0544222	0.328965	0.0564869	1	1	1	1	1	0.0558215	0.0618953	0.0501068	0.312952	0.0514529	0.0575554	0.339586	0.04867	1	0.0560419	0.0614807	0.0518224	0.405585	1	1	1	0.061558	0.0182099	0.056983	1	0.0526539	0.0585147	0.0541908	1	1	1	1	1
vB_AbaP_B5	0.0495356	1	1	1	0.0504993	1	0.0588722	0.0521368	0.0484571	0.283502	1	1	1	0.0502745	0.405585	0.0470888	1	1	1	1	1	0.0459062	0.0579967	0.049118	1	0.0490279	0.050537	0.339586	0.0456293	1	0.0500696	0.0565317	0.050537	1	1	1	1	0.0590403	0.0541699	0.0468522	1	0.0504055	0.047293	0.0514722	1	1	1	1	1
ZZ1	1	0.22668	0.224525	1	1	0.194988	1	1	1	1	1	1	0.216771	1	1	1	0.215016	1	1	1	1	1	1	1	1	1	1	1	1	0.328965	1	1	1	1	0.211692	0.209345	1	1	1	1	1	1	1	1	1	0.224525	1	0.405585	0.216771
vB_AbaP_B09_Aci08	0.056644	1	1	1	0.0462846	1	0.0625263	0.0442328	0.0485811	1	1	1	1	0.0514142	0.328965	0.050443	1	1	1	1	1	0.0520776	0.0595494	0.0493171	1	0.0483512	0.0591367	0.328965	0.051337	1	0.0556462	0.0535266	0.0549109	1	1	1	1	0.0622884	0.0552766	0.0556025	1	0.0444353	0.0561748	0.053383	1	1	1	1	1
1257_TS	1	1	1	1	1	1	1	1	1	1	1	1	1	1	1	1	1	0.154223	1	1	1	1	1	1	0.372583	1	1	1	1	1	1	1	1	1	1	1	1	1	1	1	1	1	1	1	1	1	1	0.000539989	1
WCHABP1	1	1	1	1	1	1	0.372583	1	1	0.273629	1	1	1	1	1	1	1	0.295981	1	1	0.0185887	0.339586	1	1	0.300994	1	1	1	1	1	0.35328	1	1	1	1	1	0.10389	1	1	1	0.100706	1	1	1	1	1	0.228939	0.405585	1
AP205	1	1	1	1	1	1	1	1	1	1	1	1	1	1	1	1	1	1	1	1	1	1	1	1	1	1	1	1	1	1	1	1	1	1	1	1	1	1	1	1	1	1	1	1	1	1	1	1	1
IMEAB3	1	1	1	1	1	1	1	1	1	1	1	0.000349035	1	1	1	1	1	1	1	1	1	1	1	1	1	1	1	1	1	1	1	1	1	1	1	1	1	1	1	1	1	1	1	1	1	1	1	1	1
AM24	1	1	1	0.372583	1	1	1	1	1	0.221466	1	1	1	1	1	1	1	0.306598	1	1	0.339586	0.405585	1	1	0.0317529	1	1	1	1	1	1	1	1	1	1	1	1	1	1	1	0.372583	1	1	0.405585	1	1	1	1	1
P1245_TS	0.0492083	1	1	1	0.0523744	1	0.0606151	0.0525738	0.0497188	1	1	1	1	0.0196725	0.372583	0.0369654	1	1	1	1	1	0.0466842	0.0612495	0.0471398	1	0.0478265	0.0560862	0.328965	0.0509346	1	0.0509346	0.0527542	0.0129198	0.405585	1	1	1	0.0620259	0.0429247	0.0469028	1	0.0456942	0.0458735	0.0525938	1	1	1	1	1
N24_TS	1	0.13084	0.136948	1	1	0.0196725	1	1	1	1	1	1	0.123418	1	1	1	0.019156	0.273629	1	1	1	1	1	1	1	1	1	1	1	0.339586	1	1	1	1	0.0188364	0.018216	1	1	1	1	1	1	1	1	1	0.136948	1	0.405585	0.0154865
Herod	1	1	1	0.405585	1	1	1	1	1	0.279978	1	1	1	0.405585	1	0.405585	1	0.306598	1	1	0.405585	0.35328	1	1	0.0316506	1	1	1	1	1	0.405585	1	1	1	1	1	0.405585	1	1	1	0.328965	1	1	0.372583	1	1	1	1	1
LZ35	1	1	1	1	1	1	0.405585	1	1	0.276697	1	1	1	0.405585	1	1	1	0.35328	1	1	0.0726872	0.306598	1	1	0.320287	1	1	1	1	1	0.405585	1	1	1	1	1	0.0292636	1	1	1	0.0954705	1	1	1	1	1	0.260703	1	1
SWH_Ab_3	0.0321556	1	1	1	0.0515497	1	0.0599669	0.0507826	0.0442639	1	1	1	1	0.0434051	0.35328	0.038027	1	1	1	1	0.312952	0.00595252	0.0621569	0.045613	0.35328	0.0434354	0.05569	0.320287	0.0465505	1	0.0418985	0.0552334	0.0447336	1	1	1	1	0.0627124	0.0543168	0.0369042	0.35328	0.0497555	0.0315487	0.0453547	1	1	1	1	1
AM106	1	1	1	1	1	1	1	1	1	1	1	1	1	1	1	1	1	1	1	1	1	1	1	1	1	1	1	1	1	1	1	1	1	1	1	1	1	1	1	1	0.405585	1	1	1	1	1	1	0.239237	1
Loki	1	1	1	1	1	1	1	1	1	1	1	0.239237	1	1	1	1	1	1	1	1	1	1	1	1	1	1	1	1	1	1	1	1	1	1	1	1	1	1	1	1	1	1	1	1	1	1	1	1	1
Ab105_3phi	1	1	1	1	1	1	1	1	1	0.372583	1	1	1	1	1	1	1	0.372583	1	1	0.228939	1	1	1	0.372583	1	1	1	1	1	1	1	1	1	1	1	0.228939	1	1	1	0.372583	1	1	1	1	1	1	0.242205	1
AbKT21phiIII	0.0494626	1	1	1	0.0479656	1	0.0566215	0.0483159	0.0434506	1	1	1	1	0.0483159	0.35328	0.0476535	1	1	1	1	0.197292	0.0443105	0.0605648	0.0381162	1	0.0385399	0.0514142	0.320287	0.0436939	1	0.0519792	0.054128	0.044781	1	1	1	0.405585	0.0614807	0.0517638	0.05103	1	0.0481578	0.0506879	0.0441088	1	1	1	1	1
vB_AbaP_APK89	0.0542958	1	1	1	0.0482983	1	0.0625528	0.0483336	0.0491903	1	1	1	1	0.052714	0.372583	0.0519596	1	1	1	1	1	0.0502371	0.062262	0.0476708	1	0.049627	0.0596472	0.328965	0.0506124	1	0.0558875	0.0554066	0.0538156	1	1	1	1	0.0634666	0.0559536	0.0533217	1	0.0436786	0.0517443	0.052295	1	1	1	1	1
5W	1	1	1	1	1	1	1	1	1	0.306598	1	1	1	1	1	1	1	0.320287	1	1	0.221466	1	1	1	0.35328	1	1	1	1	1	1	1	1	1	1	1	0.219531	1	1	1	0.320287	1	1	1	1	1	1	0.279978	1
P444_TS	1	0.132111	0.137429	1	1	0.0200494	1	1	1	1	1	1	0.124491	1	1	1	0.019576	0.273629	1	1	1	1	1	1	1	1	1	1	1	0.339586	1	1	1	1	0.0192381	0.0186072	1	1	1	1	1	1	1	1	1	0.137429	1	0.372583	0.0159595
vB_AbaP_PD_6A3	0.0302949	1	1	1	0.0561083	1	0.0658851	0.0575092	0.0508775	1	1	1	1	0.0463343	0.405585	0.0432241	1	1	1	1	1	0.0418841	0.0627925	0.0531789	1	0.0512985	0.0564198	0.405585	0.0495538	1	0.0480005	0.0599422	0.0458735	1	1	1	1	0.0623675	0.0516469	0.0124561	1	0.0547188	0.0226596	0.0570739	1	1	1	1	1
T515_TS	0.0513949	1	1	1	0.0520382	1	0.0559316	0.0514529	0.0523546	1	1	1	1	0.0440316	0.405585	0.0514722	1	1	1	1	1	0.0539403	0.0590403	0.0510682	1	0.0515692	0.0565541	0.339586	0.0527743	1	0.0552983	0.0595983	0.0408631	0.405585	1	1	1	0.0606402	0.00052276	0.0526338	1	0.051608	0.052295	0.0570512	1	1	1	1	1
T1245_TS	0.0489202	1	1	1	0.0522752	1	0.0604645	0.0524341	0.0494991	1	1	1	1	0.0196082	0.372583	0.0367942	1	1	1	1	1	0.0465171	0.0610453	0.0469365	1	0.0475673	0.0559757	0.328965	0.0508585	1	0.0507826	0.0525538	0.0127245	0.405585	1	1	1	0.0619475	0.042776	0.0466842	1	0.0455159	0.045613	0.052454	1	1	1	1	1
Konradin	1	0.146116	0.147104	1	1	0.0140341	1	1	1	1	1	1	0.142728	1	1	1	0.01975	1	1	1	1	1	1	1	1	1	1	1	1	0.372583	1	1	1	1	0.0174527	0.0164708	1	1	1	1	1	1	1	1	1	0.147104	1	1	0.0198407
[truncated: 108 more columns]

## Sheet: Table S5
Table S7. The list of CDSs/gene in the genome of phages and their putative functions.
locus_tag	ftype	length_bp	gene	EC_number	COG	product
P1245_00001	gene	429
P1245_00001	CDS	429				hypothetical protein
P1245_00002	gene	3099
P1245_00002	CDS	3099				putative internal virion protein
P1245_00003	gene	2886
P1245_00003	CDS	2886				structural protein
P1245_00004	gene	663
P1245_00004	CDS	663				putative internal virion protein B
P1245_00005	gene	2292
P1245_00005	CDS	2292				tail tube
P1245_00006	gene	630
P1245_00006	CDS	630				putative tail tubular protein A
P1245_00007	gene	186
P1245_00007	CDS	186				hypothetical protein
P1245_00008	gene	1032
P1245_00008	CDS	1032				phage capsid and scaffold protein
P1245_00009	gene	861
P1245_00009	CDS	861				capsid and scaffold protein
P1245_00010	gene	1557
P1245_00010	CDS	1557				head-to-tail joining protein
P1245_00011	gene	252
P1245_00011	CDS	252				structural protein
P1245_00012	gene	198
P1245_00012	CDS	198				hypothetical protein
P1245_00013	gene	2319
P1245_00013	CDS	2319				phage-associated RNA polymerase
P1245_00014	gene	471
P1245_00014	CDS	471				HNH family endonuclease
P1245_00015	gene	639
P1245_00015	CDS	639				deoxynucleoside monophosphate kinase
P1245_00016	gene	936
P1245_00016	CDS	936				metallo-dependent phosphoesterase
P1245_00017	gene	441
P1245_00017	CDS	441				putative DNA endonuclease VII
P1245_00018	gene	570
P1245_00018	CDS	570				hypothetical protein
P1245_00019	gene	966
P1245_00019	CDS	966				putative DNA exonuclease
P1245_00020	gene	891
P1245_00020	CDS	891				structural protein
P1245_00021	gene	480
P1245_00021	CDS	480				HNH family endonuclease
P1245_00022	gene	2301
P1245_00022	CDS	2301		2.7.7.7		DNA polymerase I
P1245_00023	gene	996
P1245_00023	CDS	996				DNA ligase
P1245_00024	gene	1299
P1245_00024	CDS	1299				putative DNA helicase
P1245_00025	gene	237
P1245_00025	CDS	237				hypothetical protein
P1245_00026	gene	318
P1245_00026	CDS	318				hypothetical protein
P1245_00027	gene	708
P1245_00027	CDS	708				DNA primase/helicase
P1245_00028	gene	450
P1245_00028	CDS	450				putative homing endonuclease
P1245_00029	gene	210
P1245_00029	CDS	210				hypothetical protein
P1245_00030	gene	231
P1245_00030	CDS	231				hypothetical protein
P1245_00031	gene	192
P1245_00031	CDS	192				hypothetical protein
P1245_00032	gene	168
P1245_00032	CDS	168				hypothetical protein
P1245_00033	gene	435
P1245_00033	CDS	435				hypothetical protein
P1245_00034	gene	480
P1245_00034	CDS	480				hypothetical protein
P1245_00035	gene	399
P1245_00035	CDS	399				hypothetical protein
P1245_00036	gene	105
P1245_00036	CDS	105				hypothetical protein
P1245_00037	gene	597
P1245_00037	CDS	597				hypothetical protein
P1245_00038	gene	225
P1245_00038	CDS	225				hypothetical protein
P1245_00039	gene	114
P1245_00039	CDS	114				hypothetical protein
P1245_00040	gene	375
P1245_00040	CDS	375				hypothetical protein
P1245_00041	gene	519
P1245_00041	CDS	519				hypothetical protein
P1245_00042	gene	204
P1245_00042	CDS	204				hypothetical protein
P1245_00043	gene	138
P1245_00043	CDS	138				hypothetical protein
P1245_00044	gene	1938
P1245_00044	CDS	1938				putative DNA maturase B
P1245_00045	gene	309
P1245_00045	CDS	309				putative DNA maturase A
P1245_00046	gene	558
P1245_00046	CDS	558				EF hand domain protein
P1245_00047	gene	336
P1245_00047	CDS	336				holin
P1245_00048	gene	2502
P1245_00048	CDS	2502				hypothetical protein
P1245_00049	gene	771
P1245_00049	CDS	771				hypothetical protein
P1245_00050	gene	456
P1245_00050	CDS	456				tail tube
T444
locus_tag	ftype	length_bp	gene	EC_number	COG	product
T444_00001	gene	3099
T444_00001	CDS	3099				putative internal virion protein
T444_00002	gene	2886
T444_00002	CDS	2886				structural protein
T444_00003	gene	663
T444_00003	CDS	663				putative internal virion protein B
T444_00004	gene	2292
T444_00004	CDS	2292				tail tube
T444_00005	gene	630
T444_00005	CDS	630				putative tail tubular protein A
T444_00006	gene	186
T444_00006	CDS	186				hypothetical protein
T444_00007	gene	1032
T444_00007	CDS	1032				phage capsid and scaffold protein
T444_00008	gene	861
T444_00008	CDS	861				capsid and scaffold protein
T444_00009	gene	1557
T444_00009	CDS	1557				head-to-tail joining protein
T444_00010	gene	252
T444_00010	CDS	252				structural protein
T444_00011	gene	198
T444_00011	CDS	198				hypothetical protein
T444_00012	gene	2424
T444_00012	CDS	2424				phage-associated RNA polymerase
T444_00013	gene	471
T444_00013	CDS	471				HNH family endonuclease
T444_00014	gene	639
T444_00014	CDS	639				deoxynucleoside monophosphate kinase
T444_00015	gene	936
T444_00015	CDS	936				metallo-dependent phosphoesterase
T444_00016	gene	441
T444_00016	CDS	441				putative DNA endonuclease VII
T444_00017	gene	570
T444_00017	CDS	570				hypothetical protein
T444_00018	gene	966
T444_00018	CDS	966				putative DNA exonuclease
T444_00019	gene	891
T444_00019	CDS	891				structural protein
T444_00020	gene	480
T444_00020	CDS	480				HNH family endonuclease
T444_00021	gene	1461
T444_00021	CDS	1461		2.7.7.7		DNA polymerase I
T444_00022	gene	438
T444_00022	CDS	438				HNH family endonuclease
T444_00023	gene	861
T444_00023	CDS	861		2.7.7.7		DNA polymerase I
T444_00024	gene	309
T444_00024	CDS	309				phage-associated homing endonuclease
T444_00025	gene	996
T444_00025	CDS	996				DNA ligase
T444_00026	gene	1299
T444_00026	CDS	1299				putative DNA helicase
T444_00027	gene	237
T444_00027	CDS	237				hypothetical protein
T444_00028	gene	318
T444_00028	CDS	318				hypothetical protein
T444_00029	gene	708
T444_00029	CDS	708				DNA primase/helicase
T444_00030	gene	450
T444_00030	CDS	450				putative homing endonuclease
T444_00031	gene	210
T444_00031	CDS	210				hypothetical protein
T444_00032	gene	231
T444_00032	CDS	231				hypothetical protein
T444_00033	gene	192
T444_00033	CDS	192				hypothetical protein
T444_00034	gene	168
T444_00034	CDS	168				hypothetical protein
T444_00035	gene	435
T444_00035	CDS	435				hypothetical protein
T444_00036	gene	480
T444_00036	CDS	480				hypothetical protein
T444_00037	gene	399
T444_00037	CDS	399				hypothetical protein
T444_00038	gene	105
T444_00038	CDS	105				hypothetical protein
T444_00039	gene	597
T444_00039	CDS	597				hypothetical protein
T444_00040	gene	225
T444_00040	CDS	225				hypothetical protein
T444_00041	gene	114
T444_00041	CDS	114				hypothetical protein
T444_00042	gene	375
T444_00042	CDS	375				hypothetical protein
T444_00043	gene	519
T444_00043	CDS	519				hypothetical protein
T444_00044	gene	204
T444_00044	CDS	204				hypothetical protein
T444_00045	gene	138
T444_00045	CDS	138				hypothetical protein
T444_00046	gene	1938
T444_00046	CDS	1938				putative DNA maturase B
T444_00047	gene	309
T444_00047	CDS	309				putative DNA maturase A
T444_00048	gene	558
T444_00048	CDS	558				EF hand domain protein
T444_00049	gene	336
T444_00049	CDS	336				holin
T444_00050	gene	2295
T444_00050	CDS	2295				hypothetical protein
T444_00051	gene	3099
T444_00051	CDS	3099				putative internal virion protein
T444_00052	gene	2886
T444_00052	CDS	2886				structural protein
T444_00053	gene	663
T444_00053	CDS	663				putative internal virion protein B
T444_00054	gene	1209
T444_00054	CDS	1209				tail tube
T515
locus_tag	ftype	length_bp	gene	EC_number	COG	product
P515_00001	gene	204
P515_00001	CDS	204				hypothetical protein
P515_00002	gene	138
P515_00002	CDS	138				hypothetical protein
P515_00003	gene	1938
P515_00003	CDS	1938				putative DNA maturase B
P515_00004	gene	309
P515_00004	CDS	309				putative DNA maturase A
P515_00005	gene	558
P515_00005	CDS	558				EF hand domain protein
P515_00006	gene	336
P515_00006	CDS	336				putative holin
P515_00007	gene	2379
P515_00007	CDS	2379				hypothetical protein
P515_00008	gene	3099
P515_00008	CDS	3099				putative internal virion protein
P515_00009	gene	2883
P515_00009	CDS	2883				structural protein
P515_00010	gene	663
P515_00010	CDS	663				putative internal virion protein B
P515_00011	gene	2292
P515_00011	CDS	2292				tail tube
P515_00012	gene	630
P515_00012	CDS	630				putative tail tubular protein A
P515_00013	gene	186
P515_00013	CDS	186				hypothetical protein
P515_00014	gene	1032
P515_00014	CDS	1032				phage capsid and scaffold protein
P515_00015	gene	861
P515_00015	CDS	861				capsid and scaffold protein
P515_00016	gene	1557
P515_00016	CDS	1557				head-to-tail joining protein
P515_00017	gene	252
P515_00017	CDS	252				structural protein
P515_00018	gene	198
P515_00018	CDS	198				hypothetical protein
P515_00019	gene	2418
P515_00019	CDS	2418				phage-associated RNA polymerase
P515_00020	gene	651
P515_00020	CDS	651				deoxynucleoside monophosphate kinase
P515_00021	gene	936
P515_00021	CDS	936				metallo-dependent phosphoesterase
P515_00022	gene	441
P515_00022	CDS	441				putative DNA endonuclease VII
P515_00023	gene	570
P515_00023	CDS	570				hypothetical protein
P515_00024	gene	966
P515_00024	CDS	966				putative DNA exonuclease
P515_00025	gene	891
P515_00025	CDS	891				structural protein
P515_00026	gene	207
P515_00026	CDS	207				DDE endonuclease
P515_00027	gene	2319
P515_00027	CDS	2319		2.7.7.7		DNA polymerase I
P515_00028	gene	447
P515_00028	CDS	447				phage-associated homing endonuclease
P515_00029	gene	978
P515_00029	CDS	978				DNA ligase
P515_00030	gene	741
P515_00030	CDS	741				hypothetical protein
P515_00031	gene	1299
P515_00031	CDS	1299				putative DNA helicase
P515_00032	gene	237
P515_00032	CDS	237				hypothetical protein
P515_00033	gene	318
P515_00033	CDS	318				hypothetical protein
P515_00034	gene	312
P515_00034	CDS	312				hypothetical protein
P515_00035	gene	801
P515_00035	CDS	801				DNA primase/helicase
P515_00036	gene	225
P515_00036	CDS	225				hypothetical protein
P515_00037	gene	228
P515_00037	CDS	228				hypothetical protein
P515_00038	gene	189
P515_00038	CDS	189				hypothetical protein
P515_00039	gene	180
P515_00039	CDS	180				hypothetical protein
P515_00040	gene	453
P515_00040	CDS	453				hypothetical protein
P515_00041	gene	489
P515_00041	CDS	489				hypothetical protein
P515_00042	gene	399
P515_00042	CDS	399				hypothetical protein
P515_00043	gene	105
P515_00043	CDS	105				hypothetical protein
P515_00044	gene	597
P515_00044	CDS	597				hypothetical protein
P515_00045	gene	114
P515_00045	CDS	114				hypothetical protein
P515_00046	gene	375
P515_00046	CDS	375				hypothetical protein
P515_00047	gene	510
P515_00047	CDS	510				hypothetical protein
P515_00048	gene	216
P515_00048	CDS	216				hypothetical protein
T17
locus_tag	ftype	length_bp	gene	EC_number	COG	product
T17_00001	gene	2286
T17_00001	CDS	2286				phage-associated RNA polymerase
T17_00002	gene	651
T17_00002	CDS	651				deoxynucleoside monophosphate kinase
T17_00003	gene	936
T17_00003	CDS	936				metallo-dependent phosphoesterase
T17_00004	gene	441
T17_00004	CDS	441				putative DNA endonuclease VII
T17_00005	gene	570
T17_00005	CDS	570				hypothetical protein
T17_00006	gene	966
T17_00006	CDS	966				putative DNA exonuclease
T17_00007	gene	891
T17_00007	CDS	891				structural protein
T17_00008	gene	480
T17_00008	CDS	480				HNH family endonuclease
T17_00009	gene	1461
T17_00009	CDS	1461		2.7.7.7		DNA polymerase I
T17_00010	gene	438
T17_00010	CDS	438				HNH family endonuclease
T17_00011	gene	861
T17_00011	CDS	861		2.7.7.7		DNA polymerase I
T17_00012	gene	978
T17_00012	CDS	978				DNA ligase
T17_00013	gene	741
T17_00013	CDS	741				hypothetical protein
T17_00014	gene	1299
T17_00014	CDS	1299				putative DNA helicase
T17_00015	gene	237
T17_00015	CDS	237				hypothetical protein
T17_00016	gene	318
T17_00016	CDS	318				hypothetical protein
T17_00017	gene	312
T17_00017	CDS	312				hypothetical protein
T17_00018	gene	801
T17_00018	CDS	801				DNA primase/helicase
T17_00019	gene	423
T17_00019	CDS	423				phage-associated homing endonuclease
T17_00020	gene	210
T17_00020	CDS	210				hypothetical protein
T17_00021	gene	231
T17_00021	CDS	231				hypothetical protein
T17_00022	gene	192
T17_00022	CDS	192				hypothetical protein
T17_00023	gene	168
T17_00023	CDS	168				hypothetical protein
T17_00024	gene	438
T17_00024	CDS	438				hypothetical protein
T17_00025	gene	489
T17_00025	CDS	489				hypothetical protein
T17_00026	gene	399
T17_00026	CDS	399				hypothetical protein
T17_00027	gene	105
T17_00027	CDS	105				hypothetical protein
T17_00028	gene	597
T17_00028	CDS	597				hypothetical protein
T17_00029	gene	114
T17_00029	CDS	114				hypothetical protein
T17_00030	gene	375
T17_00030	CDS	375				hypothetical protein
T17_00031	gene	510
T17_00031	CDS	510				hypothetical protein
T17_00032	gene	204
T17_00032	CDS	204				hypothetical protein
T17_00033	gene	138
T17_00033	CDS	138				hypothetical protein
T17_00034	gene	1938
T17_00034	CDS	1938				putative DNA maturase B
T17_00035	gene	309
T17_00035	CDS	309				putative DNA maturase A
T17_00036	gene	558
T17_00036	CDS	558				EF hand domain protein
T17_00037	gene	336
T17_00037	CDS	336				putative holin
T17_00038	gene	2379
T17_00038	CDS	2379				hypothetical protein
T17_00039	gene	3099
T17_00039	CDS	3099				putative internal virion protein
T17_00040	gene	2886
T17_00040	CDS	2886				structural protein
T17_00041	gene	663
T17_00041	CDS	663				putative internal virion protein B
T17_00042	gene	2292
T17_00042	CDS	2292				tail tube
T17_00043	gene	630
T17_00043	CDS	630				putative tail tubular protein A
T17_00044	gene	186
T17_00044	CDS	186				hypothetical protein
T17_00045	gene	1032
T17_00045	CDS	1032				phage capsid and scaffold protein
T17_00046	gene	861
T17_00046	CDS	861				capsid and scaffold protein
T17_00047	gene	1557
T17_00047	CDS	1557				head-to-tail joining protein
T17_00048	gene	252
T17_00048	CDS	252				structural protein
T17_00049	gene	198
T17_00049	CDS	198				hypothetical protein
T92
locus_tag	ftype	length_bp	gene	EC_number	COG	product
T92_00001	gene	138
T92_00001	CDS	138				hypothetical protein
T92_00002	gene	1938
T92_00002	CDS	1938				putative DNA maturase B
T92_00003	gene	309
T92_00003	CDS	309				putative DNA maturase A
T92_00004	gene	558
T92_00004	CDS	558				EF hand domain protein
T92_00005	gene	336
T92_00005	CDS	336				putative holin
T92_00006	gene	2379
T92_00006	CDS	2379				hypothetical protein
T92_00007	gene	3099
T92_00007	CDS	3099				putative internal virion protein
T92_00008	gene	2883
T92_00008	CDS	2883				structural protein
T92_00009	gene	663
T92_00009	CDS	663				putative internal virion protein B
T92_00010	gene	2292
T92_00010	CDS	2292				tail tube
T92_00011	gene	630
T92_00011	CDS	630				putative tail tubular protein A
T92_00012	gene	186
T92_00012	CDS	186				hypothetical protein
T92_00013	gene	1032
T92_00013	CDS	1032				phage capsid and scaffold protein
T92_00014	gene	861
T92_00014	CDS	861				capsid and scaffold protein
T92_00015	gene	1557
T92_00015	CDS	1557				head-to-tail joining protein
T92_00016	gene	252
T92_00016	CDS	252				structural protein
T92_00017	gene	198
T92_00017	CDS	198				hypothetical protein
T92_00018	gene	2418
T92_00018	CDS	2418				phage-associated RNA polymerase
T92_00019	gene	651
T92_00019	CDS	651				deoxynucleoside monophosphate kinase
T92_00020	gene	936
T92_00020	CDS	936				metallo-dependent phosphoesterase
T92_00021	gene	441
T92_00021	CDS	441				putative DNA endonuclease VII
T92_00022	gene	570
T92_00022	CDS	570				hypothetical protein
T92_00023	gene	966
T92_00023	CDS	966				putative DNA exonuclease
T92_00024	gene	891
T92_00024	CDS	891				structural protein
T92_00025	gene	423
T92_00025	CDS	423				phage-associated homing endonuclease
T92_00026	gene	2319
T92_00026	CDS	2319		2.7.7.7		DNA polymerase I
T92_00027	gene	447
T92_00027	CDS	447				phage-associated homing endonuclease
T92_00028	gene	978
T92_00028	CDS	978				DNA ligase
T92_00029	gene	741
T92_00029	CDS	741				hypothetical protein
T92_00030	gene	1299
T92_00030	CDS	1299				putative DNA helicase
T92_00031	gene	237
T92_00031	CDS	237				hypothetical protein
T92_00032	gene	318
T92_00032	CDS	318				hypothetical protein
T92_00033	gene	312
T92_00033	CDS	312				hypothetical protein
T92_00034	gene	801
T92_00034	CDS	801				DNA primase/helicase
T92_00035	gene	225
T92_00035	CDS	225				hypothetical protein
T92_00036	gene	228
T92_00036	CDS	228				hypothetical protein
T92_00037	gene	189
T92_00037	CDS	189				hypothetical protein
T92_00038	gene	180
T92_00038	CDS	180				hypothetical protein
T92_00039	gene	453
T92_00039	CDS	453				hypothetical protein
T92_00040	gene	489
T92_00040	CDS	489				hypothetical protein
T92_00041	gene	399
T92_00041	CDS	399				hypothetical protein
T92_00042	gene	105
T92_00042	CDS	105				hypothetical protein
T92_00043	gene	597
T92_00043	CDS	597				hypothetical protein
T92_00044	gene	114
T92_00044	CDS	114				hypothetical protein
T92_00045	gene	375
T92_00045	CDS	375				hypothetical protein
T92_00046	gene	510
T92_00046	CDS	510				hypothetical protein
T92_00047	gene	216
T92_00047	CDS	216				hypothetical protein
P521
locus_tag	ftype	length_bp	gene	EC_number	COG	product
P521_00001	gene	1215
P521_00001	CDS	1215				hypothetical protein
P521_00002	gene	336
P521_00002	CDS	336				holin
P521_00003	gene	558
P521_00003	CDS	558				EF hand domain protein
P521_00004	gene	309
P521_00004	CDS	309				putative DNA maturase A
P521_00005	gene	1938
P521_00005	CDS	1938				putative DNA maturase B
P521_00006	gene	138
P521_00006	CDS	138				hypothetical protein
P521_00007	gene	204
P521_00007	CDS	204				hypothetical protein
P521_00008	gene	150
P521_00008	CDS	150				hypothetical protein
P521_00009	gene	249
P521_00009	CDS	249				hypothetical protein
P521_00010	gene	510
P521_00010	CDS	510				hypothetical protein
P521_00011	gene	375
P521_00011	CDS	375				hypothetical protein
P521_00012	gene	597
P521_00012	CDS	597				hypothetical protein
P521_00013	gene	180
P521_00013	CDS	180				hypothetical protein
P521_00014	gene	399
P521_00014	CDS	399				hypothetical protein
P521_00015	gene	480
P521_00015	CDS	480				hypothetical protein
P521_00016	gene	438
P521_00016	CDS	438				hypothetical protein
P521_00017	gene	168
P521_00017	CDS	168				hypothetical protein
P521_00018	gene	189
P521_00018	CDS	189				hypothetical protein
P521_00019	gene	240
P521_00019	CDS	240				hypothetical protein
P521_00020	gene	225
P521_00020	CDS	225				hypothetical protein
P521_00021	gene	801
P521_00021	CDS	801				DNA primase/helicase
P521_00022	gene	318
P521_00022	CDS	318				hypothetical protein
P521_00023	gene	234
P521_00023	CDS	234				hypothetical protein
P521_00024	gene	1299
P521_00024	CDS	1299				putative DNA helicase
P521_00025	gene	744
P521_00025	CDS	744				hypothetical protein
P521_00026	gene	963
P521_00026	CDS	963				DNA ligase
P521_00027	gene	2295
P521_00027	CDS	2295		2.7.7.7		DNA polymerase I
P521_00028	gene	891
P521_00028	CDS	891				structural protein
P521_00029	gene	336
P521_00029	CDS	336				hypothetical protein
P521_00030	gene	966
P521_00030	CDS	966				putative DNA exonuclease
P521_00031	gene	567
P521_00031	CDS	567				hypothetical protein
P521_00032	gene	441
P521_00032	CDS	441				putative DNA endonuclease VII
P521_00033	gene	936
P521_00033	CDS	936				metallo-dependent phosphoesterase
P521_00034	gene	651
P521_00034	CDS	651				deoxynucleoside monophosphate kinase
P521_00035	gene	2418
P521_00035	CDS	2418				phage-associated RNA polymerase
P521_00036	gene	198
P521_00036	CDS	198				hypothetical protein
P521_00037	gene	252
P521_00037	CDS	252				structural protein
P521_00038	gene	1557
P521_00038	CDS	1557				head-to-tail joining protein
P521_00039	gene	861
P521_00039	CDS	861				capsid and scaffold protein
P521_00040	gene	1032
P521_00040	CDS	1032				phage capsid and scaffold protein
P521_00041	gene	186
P521_00041	CDS	186				hypothetical protein
P521_00042	gene	561
P521_00042	CDS	561				putative tail tubular protein A
P521_00043	gene	2292
P521_00043	CDS	2292				tail tube
P521_00044	gene	660
P521_00044	CDS	660				putative internal virion protein B
P521_00045	gene	2886
P521_00045	CDS	2886				structural protein
P521_00046	gene	3099
P521_00046	CDS	3099				putative internal virion protein
P521_00047	gene	387
P521_00047	CDS	387				hypothetical protein
P1033
Locus_tag	ftype	length_bp	gene	EC_number	COG	product
P1033_00001	gene	444
P1033_00001	CDS	444				hypothetical protein
P1033_00002	gene	369
P1033_00002	CDS	369				putative tail protein
P1033_00003	gene	405
P1033_00003	CDS	405				hypothetical protein
P1033_00004	gene	153
P1033_00004	CDS	153				hypothetical protein
P1033_00005	gene	669
P1033_00005	CDS	669				hypothetical protein
P1033_00006	gene	414
P1033_00006	CDS	414				hypothetical protein
P1033_00007	gene	390
P1033_00007	CDS	390				hypothetical protein
P1033_00008	gene	666
P1033_00008	CDS	666				hypothetical protein
P1033_00009	gene	957
P1033_00009	CDS	957				major capsid protein
P1033_00010	gene	768
P1033_00010	CDS	768				hypothetical protein
P1033_00011	gene	192	77
P1033_00011	CDS	192	77			gp77
P1033_00012	gene	243
P1033_00012	CDS	243				hypothetical protein
P1033_00013	gene	429
P1033_00013	CDS	429				hypothetical protein
P1033_00014	gene	1104
P1033_00014	CDS	1104				phage putative head morphogenesis protein
P1033_00015	gene	1452
P1033_00015	CDS	1452				BcepGomrgp05
P1033_00016	gene	1428
P1033_00016	CDS	1428				TerL
P1033_00017	gene	471
P1033_00017	CDS	471				phage protein
P1033_00018	gene	642
P1033_00018	CDS	642				putative transposase
P1033_00019	gene	429
P1033_00019	CDS	429				hypothetical protein
P1033_00020	gene	192
P1033_00020	CDS	192				hypothetical protein
P1033_00021	gene	651
P1033_00021	CDS	651				hypothetical protein
P1033_00022	gene	501
P1033_00022	CDS	501				hypothetical protein
P1033_00023	gene	396
P1033_00023	CDS	396				hypothetical protein
P1033_00024	gene	225
P1033_00024	CDS	225				hypothetical protein
P1033_00025	gene	423
P1033_00025	CDS	423				hypothetical protein
P1033_00026	gene	423
P1033_00026	CDS	423				hypothetical protein
P1033_00027	gene	750
P1033_00027	CDS	750				hypothetical protein
P1033_00028	gene	951
P1033_00028	CDS	951				hypothetical protein
P1033_00029	gene	1047
P1033_00029	CDS	1047				DNA methyltransferase
P1033_00030	gene	390
P1033_00030	CDS	390				hypothetical protein
P1033_00031	gene	321
P1033_00031	CDS	321				hypothetical protein
P1033_00032	gene	252
P1033_00032	CDS	252				hypothetical protein
P1033_00033	gene	765
P1033_00033	CDS	765				putative repressor protein
P1033_00034	gene	216
P1033_00034	CDS	216				hypothetical protein
P1033_00035	gene	2268
P1033_00035	CDS	2268		2.1.1.72		putative restriction-modification protein
P1033_00036	gene	441
P1033_00036	CDS	441				hypothetical protein
P1033_00037	gene	324
P1033_00037	CDS	324				hypothetical protein
P1033_00038	gene	1122
P1033_00038	CDS	1122				putative phage nucleotide-binding protein
P1033_00039	gene	960
P1033_00039	CDS	960				hypothetical protein
P1033_00040	gene	258
P1033_00040	CDS	258				hypothetical protein
P1033_00041	gene	210
P1033_00041	CDS	210				hypothetical protein
P1033_00042	gene	285
P1033_00042	CDS	285				hypothetical protein
P1033_00043	gene	258
P1033_00043	CDS	258				hypothetical protein
P1033_00044	gene	270
P1033_00044	CDS	270				hypothetical protein
P1033_00045	gene	1263
P1033_00045	CDS	1263				hypothetical protein
P1033_00046	gene	300
P1033_00046	CDS	300				IS3 family transposase ISAba22
P1033_00047	gene	855
P1033_00047	CDS	855				ISEhe3 orfB
P1033_00048	gene	150
P1033_00048	CDS	150				hypothetical protein
P1033_00049	gene	594
P1033_00049	CDS	594				hypothetical protein
P1033_00050	gene	648
P1033_00050	CDS	648				hypothetical protein
P1033_00051	gene	681
P1033_00051	CDS	681				hypothetical protein
P1033_00052	gene	546
P1033_00052	CDS	546				endolysin
P1033_00053	gene	390
P1033_00053	CDS	390				hypothetical protein
P1033_00054	gene	3426
P1033_00054	CDS	3426				hypothetical protein
P1033_00055	gene	363
P1033_00055	CDS	363				hypothetical protein
P1033_00056	gene	507
P1033_00056	CDS	507				hypothetical protein
P1033_00057	gene	399
P1033_00057	CDS	399				hypothetical protein
P1033_00058	gene	588
P1033_00058	CDS	588				hypothetical protein
P1033_00059	gene	4509
P1033_00059	CDS	4509				hypothetical protein
P1033_00060	gene	522
P1033_00060	CDS	522				hypothetical protein
P1033_00061	gene	237
P1033_00061	CDS	237				hypothetical protein
P1033_00062	gene	930
P1033_00062	CDS	930				hypothetical protein
P1033_00063	gene	711
P1033_00063	CDS	711				hypothetical protein
P1033_00064	gene	552
P1033_00064	CDS	552				hypothetical protein
P1033_00065	gene	918
P1033_00065	CDS	918				putative phage minor tail protein
P1033_00066	gene	1356
P1033_00066	CDS	1356				putative tail fiber
P1033_00067	gene	189
P1033_00067	CDS	189				hypothetical protein
P1033_00068	gene	501
P1033_00068	CDS	501				hypothetical protein
P1033_00069	gene	222
P1033_00069	CDS	222				hypothetical protein
P1033_00070	gene	696
P1033_00070	CDS	696				hypothetical protein
P1033_00071	gene	324
P1033_00071	CDS	324				hypothetical protein
P1033_00072	gene	279
P1033_00072	CDS	279				hypothetical protein
P1033_00073	gene	198
P1033_00073	CDS	198				hypothetical protein
P1033_00074	gene	423
P1033_00074	CDS	423				hypothetical protein
P1033_00075	gene	594
P1033_00075	CDS	594				hypothetical protein
P1033_00076	gene	219
P1033_00076	CDS	219				hypothetical protein
P1033_00077	gene	279
P1033_00077	CDS	279				hypothetical protein
P1033_00078	gene	246
P1033_00078	CDS	246				hypothetical protein
P1033_00079	gene	333
P1033_00079	CDS	333				hypothetical protein
P1033_00080	gene	873
P1033_00080	CDS	873				thymidylate synthase
P1033_00081	gene	381
P1033_00081	CDS	381				hypothetical protein
P1033_00082	gene	393
P1033_00082	CDS	393				hypothetical protein
P1033_00083	gene	2433
P1033_00083	CDS	2433				putative integrase
P1033_00084	gene	1941
P1033_00084	CDS	1941				putative DNA polymerase subunit
P1033_00085	gene	534
P1033_00085	CDS	534				hypothetical protein
P1033_00086	gene	108
P1033_00086	CDS	108				hypothetical protein
P1033_00087	gene	717
P1033_00087	CDS	717				putative exonuclease
P1033_00088	gene	351
P1033_00088	CDS	351				hypothetical protein
P1033_00089	gene	330
P1033_00089	CDS	330				hypothetical protein
P1033_00090	gene	279
P1033_00090	CDS	279				hypothetical protein
P1033_00091	gene	1389
P1033_00091	CDS	1389				putative DNA helicase
P1033_00092	gene	480
P1033_00092	CDS	480				hypothetical protein
P1033_00093	gene	816
P1033_00093	CDS	816				hypothetical protein
P1033_00094	gene	1647
P1033_00094	CDS	1647				putative cabamoyl transferase
P1033_00095	gene	675
P1033_00095	CDS	675				hypothetical protein
P1033_00096	gene	498
P1033_00096	CDS	498				putative DNA polymerase subunit
P1033_00097	gene	804
P1033_00097	CDS	804				putative thymidylate synthase
P1033_00098	gene	528	317
P1033_00098	CDS	528	317			gp317
P1033_00099	gene	1098
P1033_00099	CDS	1098				putative DNA ligase
P1033_00100	gene	147
P1033_00100	CDS	147				hypothetical protein
P1033_00101	gene	600
P1033_00101	CDS	600				putative endodeoxyribonuclease
P1033_00102	gene	543	ORF02
P1033_00102	CDS	543	ORF02			endolysin
P1033_00103	gene	276
P1033_00103	CDS	276				hypothetical protein
P1033_00104	gene	357
P1033_00104	CDS	357				hypothetical protein
P1033_00105	gene	2430
P1033_00105	CDS	2430				hypothetical protein
P1033_00106	gene	432
P1033_00106	CDS	432				phage cell wall peptidase
P1033_00107	gene	912
P1033_00107	CDS	912				hypothetical protein
P1033_00108	gene	1755
P1033_00108	CDS	1755				hypothetical protein
P1033_00109	gene	858
P1033_00109	CDS	858				hypothetical protein ORF035
P1033_00110	gene	630
P1033_00110	CDS	630				hypothetical protein
P1033_00111	gene	3366
P1033_00111	CDS	3366				hypothetical protein
P1033_00112	gene	327
P1033_00112	CDS	327				hypothetical protein
P1033_00113	gene	423
P1033_00113	CDS	423				hypothetical protein
P1033_00114	gene	375
P1033_00114	CDS	375				hypothetical protein
P1033_00115	gene	369
P1033_00115	CDS	369				hypothetical protein
P1033_00116	gene	489
P1033_00116	CDS	489				hypothetical protein
P1033_00117	gene	327
P1033_00117	CDS	327				hypothetical protein
P1033_00118	gene	918
P1033_00118	CDS	918				putative phage structural protein
P1033_00119	gene	702
P1033_00119	CDS	702				putative phage structural protein
P1033_00120	gene	1443
P1033_00120	CDS	1443				putative phage structural protein
P1033_00121	gene	1419
P1033_00121	CDS	1419				putative phage terminase large subunit
P1033_00122	gene	300
P1033_00122	CDS	300				hypothetical protein
P1033_00123	gene	405
P1033_00123	CDS	405				hypothetical protein
P1033_00124	gene	465
P1033_00124	CDS	465				hypothetical protein
P1033_00125	gene	357
P1033_00125	CDS	357				hypothetical protein
P1033_00126	gene	141
P1033_00126	CDS	141				hypothetical protein
P1033_00127	gene	243
P1033_00127	CDS	243				hypothetical protein
P1033_00128	gene	396
P1033_00128	CDS	396				hypothetical protein
P1033_00129	gene	909
P1033_00129	CDS	909				putative major capsid protein
P1033_00130	gene	399
P1033_00130	CDS	399				hypothetical protein
P1033_00131	gene	564
P1033_00131	CDS	564				major tail subunit
P1033_00132	gene	2076
P1033_00132	CDS	2076				hypothetical protein
P1033_00133	gene	456
P1033_00133	CDS	456				gp26.2
P1033_00134	gene	501
P1033_00134	CDS	501				hypothetical protein
P1033_00135	gene	426
P1033_00135	CDS	426				hypothetical protein
P1033_00136	gene	2067
P1033_00136	CDS	2067				hypothetical protein
P1033_00137	gene	2892
P1033_00137	CDS	2892				hypothetical protein
P1033_00138	gene	2526
P1033_00138	CDS	2526				structural protein
P1033_00139	gene	309
P1033_00139	CDS	309				hypothetical protein
P1033_00140	gene	1683
P1033_00140	CDS	1683				hypothetical protein
P1033_00141	gene	2403
P1033_00141	CDS	2403				hypothetical protein
P1033_00142	gene	459
P1033_00142	CDS	459				hypothetical protein
P1033_00143	gene	1092
P1033_00143	CDS	1092				hypothetical protein
P1033_00144	gene	351
P1033_00144	CDS	351				hypothetical protein
P1033_00145	gene	219
P1033_00145	CDS	219				hypothetical protein
P1033_00146	gene	555
P1033_00146	CDS	555				putative endolysin/autolysin
P1033_00147	gene	156
P1033_00147	CDS	156				hypothetical protein
P1033_00148	gene	1020
P1033_00148	CDS	1020				integrase
P1033_00149	gene	291
P1033_00149	CDS	291				hypothetical protein
P1033_00150	gene	270
P1033_00150	CDS	270				hypothetical protein
P1033_00151	gene	483
P1033_00151	CDS	483				gp44
P1033_00152	gene	354
P1033_00152	CDS	354				hypothetical protein
P1033_00153	gene	369
P1033_00153	CDS	369				hypothetical protein
P1033_00154	gene	660
P1033_00154	CDS	660				hypothetical protein
P1033_00155	gene	939
P1033_00155	CDS	939				hypothetical protein
P1033_00156	gene	597
P1033_00156	CDS	597				hypothetical protein
P1033_00157	gene	267
P1033_00157	CDS	267				hypothetical protein
P1033_00158	gene	414
P1033_00158	CDS	414				hypothetical protein
P1033_00159	gene	492
P1033_00159	CDS	492				hypothetical protein
P1033_00160	gene	684	cI
P1033_00160	CDS	684	cI			repressor
P1033_00161	gene	219
P1033_00161	CDS	219				hypothetical protein
P1033_00162	gene	324
P1033_00162	CDS	324				hypothetical protein
P1033_00163	gene	891
P1033_00163	CDS	891				hypothetical protein
P1033_00164	gene	840
P1033_00164	CDS	840				hypothetical protein
P1033_00165	gene	489
P1033_00165	CDS	489				hypothetical protein
P1033_00166	gene	360
P1033_00166	CDS	360				hypothetical protein
P1033_00167	gene	507
P1033_00167	CDS	507				hypothetical protein
P1033_00168	gene	411
P1033_00168	CDS	411				hypothetical protein
P1033_00169	gene	336
P1033_00169	CDS	336				hypothetical protein
P1033_00170	gene	357
P1033_00170	CDS	357				hypothetical protein
P1033_00171	gene	210
P1033_00171	CDS	210				hypothetical protein
P1033_00172	gene	396
P1033_00172	CDS	396				hypothetical protein
P1033_00173	gene	399
P1033_00173	CDS	399				hypothetical protein
P1033_00174	gene	204
P1033_00174	CDS	204				hypothetical protein
P1033_00175	gene	366
P1033_00175	CDS	366				hypothetical protein
P1033_00176	gene	186
P1033_00176	CDS	186				hypothetical protein
P1033_00177	gene	1662
P1033_00177	CDS	1662				head-tail connector protein
P1033_00178	gene	456
P1033_00178	CDS	456				hypothetical protein
P1033_00179	gene	306
P1033_00179	CDS	306				hypothetical protein
P1033_00180	gene	339
P1033_00180	CDS	339				hypothetical protein
P245
locus_tag	ftype	length_bp	gene	EC_number	COG	product
P245_00001	gene	270
P245_00001	CDS	270				hypothetical protein
P245_00002	gene	432
P245_00002	CDS	432				phage cell wall peptidase
P245_00003	gene	2487
P245_00003	CDS	2487				hypothetical protein
P245_00004	gene	357
P245_00004	CDS	357				hypothetical protein
P245_00005	gene	276
P245_00005	CDS	276				hypothetical protein
P245_00006	gene	543	ORF02
P245_00006	CDS	543	ORF02			endolysin
P245_00007	gene	600
P245_00007	CDS	600				putative endodeoxyribonuclease
P245_00008	gene	1098
P245_00008	CDS	1098				putative DNA ligase
P245_00009	gene	528	317
P245_00009	CDS	528	317			gp317
P245_00010	gene	804
P245_00010	CDS	804				putative thymidylate synthase
P245_00011	gene	498
P245_00011	CDS	498				putative DNA polymerase subunit
P245_00012	gene	675
P245_00012	CDS	675				hypothetical protein
P245_00013	gene	1647
P245_00013	CDS	1647				putative cabamoyl transferase
P245_00014	gene	816
P245_00014	CDS	816				hypothetical protein
P245_00015	gene	480
P245_00015	CDS	480				hypothetical protein
P245_00016	gene	1389
P245_00016	CDS	1389				putative DNA helicase
P245_00017	gene	279
P245_00017	CDS	279				hypothetical protein
P245_00018	gene	330
P245_00018	CDS	330				hypothetical protein
P245_00019	gene	351
P245_00019	CDS	351				hypothetical protein
P245_00020	gene	717
P245_00020	CDS	717				putative exonuclease
P245_00021	gene	108
P245_00021	CDS	108				hypothetical protein
P245_00022	gene	534
P245_00022	CDS	534				hypothetical protein
P245_00023	gene	1941
P245_00023	CDS	1941				putative DNA polymerase subunit
P245_00024	gene	2433
P245_00024	CDS	2433				putative integrase
P245_00025	gene	393
P245_00025	CDS	393				hypothetical protein
P245_00026	gene	381
P245_00026	CDS	381				hypothetical protein
P245_00027	gene	873
P245_00027	CDS	873				thymidylate synthase
P245_00028	gene	333
P245_00028	CDS	333				hypothetical protein
P245_00029	gene	246
P245_00029	CDS	246				hypothetical protein
P245_00030	gene	279
P245_00030	CDS	279				hypothetical protein
P245_00031	gene	219
P245_00031	CDS	219				hypothetical protein
P245_00032	gene	594
P245_00032	CDS	594				hypothetical protein
P245_00033	gene	423
P245_00033	CDS	423				hypothetical protein
P245_00034	gene	198
P245_00034	CDS	198				hypothetical protein
P245_00035	gene	279
P245_00035	CDS	279				hypothetical protein
P245_00036	gene	324
P245_00036	CDS	324				hypothetical protein
P245_00037	gene	696
P245_00037	CDS	696				hypothetical protein
P245_00038	gene	222
P245_00038	CDS	222				hypothetical protein
P245_00039	gene	501
P245_00039	CDS	501				hypothetical protein
P245_00040	gene	243
P245_00040	CDS	243				hypothetical protein
P245_00041	gene	357
P245_00041	CDS	357				hypothetical protein
P245_00042	gene	465
P245_00042	CDS	465				hypothetical protein
P245_00043	gene	405
P245_00043	CDS	405				hypothetical protein
P245_00044	gene	321
P245_00044	CDS	321				hypothetical protein
P245_00045	gene	300
P245_00045	CDS	300				hypothetical protein
P245_00046	gene	1419
P245_00046	CDS	1419				putative phage terminase large subunit
P245_00047	gene	1443
P245_00047	CDS	1443				putative phage structural protein
P245_00048	gene	702
P245_00048	CDS	702				putative phage structural protein
P245_00049	gene	918
P245_00049	CDS	918				putative phage structural protein
P245_00050	gene	327
P245_00050	CDS	327				hypothetical protein
P245_00051	gene	489
P245_00051	CDS	489				hypothetical protein
P245_00052	gene	369
P245_00052	CDS	369				hypothetical protein
P245_00053	gene	375
P245_00053	CDS	375				hypothetical protein
P245_00054	gene	423
P245_00054	CDS	423				hypothetical protein
P245_00055	gene	327
P245_00055	CDS	327				hypothetical protein
P245_00056	gene	3366
P245_00056	CDS	3366				hypothetical protein
P245_00057	gene	630
P245_00057	CDS	630				hypothetical protein
P245_00058	gene	858
P245_00058	CDS	858				hypothetical protein ORF035
P245_00059	gene	1755
P245_00059	CDS	1755				hypothetical protein

## Sheet: Table S6
Table S8. The common presence of genes in study.
Gene	Non-unique Gene name	Annotation	No. isolates	No. sequences	Avg sequences per isolate	Genome Fragment	Order within Fragment	Accessory Fragment	Accessory Order with Fragment	QC	Min group size nuc	Max group size nuc	Avg group size nuc	P1033	P245	P521	T1245	T17	T444	T515	T92
group_129		structural protein	11	11	1	2	6	2	101		890	890	890			P521_00028	T1245_00020	T17_00007	T444_00019	T515_00043	T92_00024
group_130		DNA primase/helicase	11	11	1	2	73	2	118		707	800	757			P521_00021	T1245_00027	T17_00018	T444_00029	T515_00032	T92_00034
group_131		EF hand domain protein	11	11	1	2	96	2	62		557	557	557			P521_00003	T1245_00046	T17_00036	T444_00048	T515_00014	T92_00004
group_132		holin	11	11	1	2	97	2	63		329	335	334			P521_00002	T1245_00047	T17_00037	T444_00049	T515_00013	T92_00005
group_205		phage capsid and scaffold protein	11	11	1	2	117	2	87		1031	1031	1031			P521_00040	T1245_00008	T17_00045	T444_00007	T515_00005	T92_00013
group_207		structural protein	11	11	1	2	16	2	90		251	251	251			P521_00037	T1245_00011	T17_00048	T444_00010	T515_00002	T92_00016
group_209		putative DNA exonuclease	11	11	1	2	7	2	100		965	965	965			P521_00030	T1245_00019	T17_00006	T444_00018	T515_00044	T92_00023
group_210		putative DNA helicase	11	11	1	2	69	2	111		1298	1298	1298			P521_00024	T1245_00024	T17_00014	T444_00026	T515_00036	T92_00030
group_212		hypothetical protein	11	11	1	2	85	2	48		596	596	596			P521_00012	T1245_00037	T17_00028	T444_00039	T515_00022	T92_00043
group_4290		head-to-tail joining protein	11	11	1	2	119	2	89		1556	1556	1556			P521_00038	T1245_00010	T17_00047	T444_00009	T515_00003	T92_00015
group_4294		metallo-dependent phosphoesterase	11	11	1	2	11	2	96		935	935	935			P521_00033	T1245_00016	T17_00003	T444_00015	T515_00047	T92_00020
group_4295		putative DNA endonuclease VII	11	11	1	2	10	2	98		440	440	440			P521_00032	T1245_00017	T17_00004	T444_00016	T515_00046	T92_00021
group_4313		putative DNA maturase B	11	11	1	2	93	2	59		1937	1937	1937			P521_00005	T1245_00044	T17_00034	T444_00046	T515_00016	T92_00002
group_68		capsid and scaffold protein	11	11	1	2	118	2	88		860	860	860			P521_00039	T1245_00009	T17_00046	T444_00008	T515_00004	T92_00014
group_70		phage-associated RNA polymerase	11	11	1	2	13	2	92		2285	2423	2397			P521_00035	T1245_00013	T17_00001	T444_00012	T515_00049	T92_00018
group_16		hypothetical protein	10	10	1	2	98	2	64		1214	2501	2083			P521_00001	T1245_00048	T17_00038	T444_00050	T515_00012	T92_00006
group_71		hypothetical protein	10	10	1	2	92	2	58		137	137	137			P521_00006	T1245_00043	T17_00033	T444_00045	T515_00017	T92_00001
group_75		hypothetical protein	10	10	1	2	14	2	91		197	197	197			P521_00036	T1245_00012	T17_00049	T444_00011	T515_00001	T92_00017
group_77		DNA polymerase I	10	10	1	2	59	2	103		860	2318	1729				T1245_00022	T17_00011	T444_00023	T515_00039	T92_00026
group_213		hypothetical protein	9	9	1	2	91	2	54		203	203	203			P521_00007	T1245_00042	T17_00032	T444_00044	T515_00018
group_51		tail tube	8	8	1	2	104	2	77		455	2291	1926					T17_00042	T444_00054	T515_00008	T92_00010
group_198		putative internal virion protein	7	7	1	2	100	2	65		3098	3098	3098					T17_00039	T444_00051	T515_00011	T92_00007
group_199		structural protein	7	7	1	2	110	2	75		2885	2885	2885			P521_00045	T1245_00003	T17_00040	T444_00002
group_202		putative internal virion protein B	7	7	1	2	102	2	76		662	662	662					T17_00041	T444_00053	T515_00009	T92_00009
group_4302		hypothetical protein	7	7	1	2	75	2	28		209	209	209				T1245_00029	T17_00020	T444_00031	T515_00030
group_4303		hypothetical protein	7	7	1	2	76	2	29		230	230	230				T1245_00030	T17_00021	T444_00032	T515_00029
group_4305		hypothetical protein	7	7	1	2	78	2	32		167	167	167				T1245_00032	T17_00023	T444_00034	T515_00027
group_135		hypothetical protein	6	6	1	2	34	2	45		488	488	488					T17_00025		T515_00025	T92_00040
group_197		putative internal virion protein	6	6	1	2	109	2	69		3098	3098	3098			P521_00046	T1245_00002		T444_00001
group_200		structural protein	6	6	1	2	101	2	66		2882	2885	2883						T444_00052	T515_00010	T92_00008
group_203		putative tail tubular protein A	6	6	1	2	114	2	72		560	629	617			P521_00042	T1245_00006		T444_00005
group_204		putative tail tubular protein A	6	6	1	2	105	2	84		629	629	629					T17_00043		T515_00007	T92_00011
group_252		putative DNA maturase A	6	6	1	2	94	2	60		308	308	308			P521_00004		T17_00035		T515_00015	T92_00003
group_257		hypothetical protein	6	6	1	2	28	2	56		509	509	509			P521_00010		T17_00031		T515_00019	T92_00046
group_4288		hypothetical protein	6	6	1	2	115	2	86		185	185	185				T1245_00007	T17_00044	T444_00006
group_50		tail tube	6	6	1	2	113	2	73		2291	2291	2291			P521_00043	T1245_00005		T444_00004
group_122		IS4 family transposase ISAba33	5	5	1	1	447	1	4574		392	569	517
group_201		putative internal virion protein B	5	5	1	2	111	2	74		662	662	662				T1245_00004		T444_00003
group_211		hypothetical protein	5	5	1	2	80	2	34		479	479	479			P521_00015	T1245_00034		T444_00036
group_254		phage-associated homing endonuclease	5	5	1	2	60	2	105		308	446	390						T444_00024		T92_00027
group_255		hypothetical protein	5	5	1	2	63	2	108		740	740	740					T17_00013		T515_00037	T92_00029
group_256		hypothetical protein	5	5	1	2	72	2	114		311	311	311					T17_00017		T515_00033	T92_00033
group_4293		deoxynucleoside monophosphate kinase	5	5	1	2	1	2	94		638	638	638				T1245_00015		T444_00014
group_4296		hypothetical protein	5	5	1	2	9	2	97		569	569	569				T1245_00018		T444_00017
group_4297		HNH family endonuclease	5	5	1	2	58	2	5		479	479	479				T1245_00021		T444_00020
group_4298		DNA ligase	5	5	1	2	61	2	104		986	995	993				T1245_00023		T444_00025
group_4299		hypothetical protein	5	5	1	2	68	2	110		236	236	236				T1245_00025		T444_00027
group_4300		hypothetical protein	5	5	1	2	52	2	119		317	317	317				T1245_00026		T444_00028
group_4301		putative homing endonuclease	5	5	1	2	74	2	27		449	449	449				T1245_00028		T444_00030
group_4304		hypothetical protein	5	5	1	2	77	2	30		191	191	191				T1245_00031		T444_00033
group_4310		hypothetical protein	5	5	1	2	88	2	50		113	113	113				T1245_00039		T444_00041
group_4312		hypothetical protein	5	5	1	2	90	2	53		518	518	518				T1245_00041		T444_00043
group_4314		putative DNA maturase A	5	5	1	2	95	2	61		308	308	308				T1245_00045		T444_00047
group_4715		deoxynucleoside monophosphate kinase	5	5	1	2	12	2	95		650	650	650					T17_00002		T515_00048	T92_00019
group_4716		hypothetical protein	5	5	1	2	8	2	99		569	569	569					T17_00005		T515_00045	T92_00022
group_4718		hypothetical protein	5	5	1	2	70	2	112		236	236	236					T17_00015		T515_00035	T92_00031
group_4719		hypothetical protein	5	5	1	2	71	2	113		317	317	317					T17_00016		T515_00034	T92_00032
group_4725		hypothetical protein	5	5	1	2	35	2	46		398	398	398					T17_00026		T515_00024	T92_00041
group_4726		hypothetical protein	5	5	1	2	36	2	47		104	104	104					T17_00027		T515_00023	T92_00042
group_4727		hypothetical protein	5	5	1	2	84	2	38		113	113	113					T17_00029		T515_00021	T92_00044
group_196		hypothetical protein	4	4	1	2	107	2	67	Hypothetical protein with no hits to refseq/uniprot/clusters/cdd/tigrfams/pfam overlapping another protein with hits	386	428	417			P521_00047	T1245_00001
group_251		HNH family endonuclease	4	4	1	2	56	2	4		368	437	419					T17_00010	T444_00022	T515_00040
group_4292		HNH family endonuclease	4	4	1	2	2	2	93		470	470	470				T1245_00014		T444_00013
group_4711		DNA polymerase I	4	4	1	2	55	2	3		1460	1484	1466					T17_00009	T444_00021	T515_00041
group_4714		hypothetical protein	4	4	1	2	106	2	85		185	185	185							T515_00006	T92_00012
group_1000		hypothetical protein	3	3	1	1	873	1	3455		380	380	380
group_133		hypothetical protein	3	3	1	1	442	1	4563		3689	3734	3704
group_137		hypothetical protein	3	3	1	1	3979	1	1070		389	389	389	P1033_00007
group_142		putative transposase	3	3	1	1	3998	1	2764		641	641	641	P1033_00018
group_143		hypothetical protein	3	3	1	1	3465	1	774		749	749	749	P1033_00027
group_144		hypothetical protein	3	3	1	1	4016	1	2782		176	215	189	P1033_00034
group_145		ISEhe3 orfB	3	3	1	1	3283	1	494		449	854	584	P1033_00047
group_148		hypothetical protein	3	3	1	1	3141	1	3951		2861	2891	2871	P1033_00137
group_150		hypothetical protein	3	3	1	1	910	1	2947		368	368	368	P1033_00153
group_151		hypothetical protein	3	3	1	1	2699	1	4070		596	596	596	P1033_00156
group_152		hypothetical protein	3	3	1	1	906	1	2951		266	278	274	P1033_00157
group_153		hypothetical protein	3	3	1	1	905	1	2952		377	413	389	P1033_00158
group_154		hypothetical protein	3	3	1	1	891	1	2979		410	410	410	P1033_00168
uvsW		RNA-DNA and DNA-DNA helicase	3	3	1	1	172	1	4400		1511	1511	1511
group_222		tail sheath protein	3	3	1	1	158	1	4386		1976	1976	1976
group_224		hypothetical protein	3	3	1	1	134	1	4362		455	455	455
group_225		hypothetical protein	3	3	1	1	128	1	4356		566	566	566
group_226		hypothetical protein	3	3	1	1	127	1	4355		275	275	275
group_227		hypothetical protein	3	3	1	1	106	1	4418		698	698	698
group_228		hypothetical protein	3	3	1	1	96	1	4428		371	371	371
group_229		hypothetical protein	3	3	1	1	94	1	4430	Hypothetical protein with no hits to refseq/uniprot/clusters/cdd/tigrfams/pfam overlapping another protein with hits	149	149	149
group_230		hypothetical protein	3	3	1	1	315	1	4447		227	227	227
group_231		RB69ORF051c hypothetical protein	3	3	1	1	329	1	4461		380	380	380
group_232		hypothetical protein	3	3	1	1	337	1	4469		191	191	191
group_233		hypothetical protein	3	3	1	1	347	1	4479		398	398	398
group_234		hypothetical protein	3	3	1	1	356	1	4488		620	626	622
56		gp56 dCTPase	3	3	1	1	358	1	4490		518	518	518
group_236		hypothetical protein	3	3	1	1	359	1	4491		569	569	569
group_237		hypothetical protein	3	3	1	1	360	1	4492		137	137	137
group_238		hypothetical protein	3	3	1	1	368	1	4500		206	242	218
group_239		putative DNA binding protein	3	3	1	1	369	1	4501		473	473	473
group_240		hypothetical protein	3	3	1	1	374	1	4507		188	194	190
group_241		hypothetical protein	3	3	1	1	375	1	4508		344	344	344
group_242		hypothetical protein	3	3	1	1	386	1	4519		146	146	146
group_243		hypothetical protein	3	3	1	1	430	1	4552		407	407	407
group_244		hypothetical protein	3	3	1	1	428	1	4549		278	278	278
group_245		hypothetical protein	3	3	1	1	415	1	4320		299	299	299
pseT		PseT polynucleotide 5'-kinase and 3'-phosphatase	3	3	1	1	184	1	4321		920	920	920
group_247		hypothetical protein	3	3	1	1	196	1	4331		662	662	662
48		gp48 baseplate tail tube cap	3	3	1	1	201	1	4412		470	1091	884
group_253		phage-associated homing endonuclease	3	3	1	2	57	2	102		206	422	350								T92_00025
group_265		hypothetical protein	3	3	1	1	3982	1	2756		767	767	767	P1033_00010
77		gp77	3	3	1	1	3983	1	2757		191	191	191	P1033_00011
group_268		hypothetical protein	3	3	1	1	3993	1	2759		428	428	428	P1033_00013
group_269		BcepGomrgp05	3	3	1	1	3995	1	2761		1451	1451	1451	P1033_00015
group_270		TerL	3	3	1	1	3996	1	2762		1427	1427	1427	P1033_00016
group_272		phage protein	3	3	1	1	3997	1	2763		470	470	470	P1033_00017
group_284		hypothetical protein	3	3	1	1	4013	1	2779		320	320	320	P1033_00031
group_285		hypothetical protein	3	3	1	1	4014	1	2780		251	251	251	P1033_00032
group_286		putative repressor protein	3	3	1	1	4015	1	2781		764	764	764	P1033_00033
group_295		hypothetical protein	3	3	1	1	1872	1	3597		269	269	269	P1033_00044
group_296		hypothetical protein	3	3	1	1	1873	1	3598		1262	1262	1262	P1033_00045
group_388		hypothetical protein	3	3	1	1	3152	1	3946		308	308	308	P1033_00139
group_407		hypothetical protein	3	3	1	1	898	1	2961		890	890	890	P1033_00163
group_4306		hypothetical protein	3	3	1	2	79	2	33		434	434	434				T1245_00033		T444_00035
group_4307		hypothetical protein	3	3	1	2	81	2	35		398	398	398				T1245_00035		T444_00037
group_4308		hypothetical protein	3	3	1	2	82	2	36		104	104	104				T1245_00036		T444_00038
group_4309		hypothetical protein	3	3	1	2	86	2	49		224	224	224				T1245_00038		T444_00040
group_4311		hypothetical protein	3	3	1	2	89	2	51		374	374	374				T1245_00040		T444_00042
group_4483		baseplate hub subunit, tail length determinator	3	3	1	1	183	1	4411		1724	1724	1724
group_4484		baseplate hub distal subunit	3	3	1	1	182	1	4410		548	548	548
group_4485		baseplate hub subunit	3	3	1	1	181	1	4409		1583	1583	1583
51		gp51 baseplate hub assembly catalyst	3	3	1	1	180	1	4408		755	755	755
26		gp26 baseplate hub subunit	3	3	1	1	179	1	4407		644	644	644
group_4488		baseplate wedge subunit	3	3	1	1	178	1	4406		398	398	398
group_4489		hypothetical protein	3	3	1	1	177	1	4405		167	167	167
group_4490		hypothetical protein	3	3	1	1	176	1	4404		167	167	167
group_4491		hypothetical protein	3	3	1	1	175	1	4403		317	317	317
group_4492		hypothetical protein	3	3	1	1	174	1	4402		272	272	272
group_4493		hypothetical protein	3	3	1	1	173	1	4401		269	269	269
inh		nhibitor of prohead protease	3	3	1	1	171	1	4399		698	698	698
hoc		head outer capsid protein	3	3	1	1	170	1	4398		1085	1085	1085
24		gp24 head vertex protein	3	3	1	1	169	1	4397		1271	1271	1271
23		gp23 major head subunit precursor	3	3	1	1	167	1	4395		1580	1580	1580
22		gp22 prohead core scaffold protein	3	3	1	1	166	1	4394		833	833	833
21		gp21 prohead core scaffold protein and protease	3	3	1	1	165	1	4393		647	647	647
68		gp68 prohead core protein	3	3	1	1	164	1	4392		428	428	428
group_4501		hypothetical protein	3	3	1	1	163	1	4391		200	200	200
group_4502		portal head vertex protein	3	3	1	1	162	1	4390		1553	1553	1553
19		gp19 tail tube protein	3	3	1	1	160	1	4388		491	491	491
group_4506		terminase DNA packaging enzyme large subunit	3	3	1	1	157	1	4385		1856	1856	1856
group_4507		hypothetical protein	3	3	1	1	156	1	4384	Hypothetical protein with no hits to refseq/uniprot/clusters/cdd/tigrfams/pfam overlapping another protein with hits	437	437	437
16		gp16 terminase DNA packaging enzyme small subunit	3	3	1	1	155	1	4383		482	482	482
15		gp15 tail sheath stabilizer and completion protein	3	3	1	1	154	1	4382		776	776	776
group_4510		neck protein	3	3	1	1	153	1	4381		764	764	764
13		gp13 neck protein	3	3	1	1	152	1	4380		917	917	917
wac		Wac fibritin neck whiskers protein	3	3	1	1	151	1	4379		1865	1865	1865
group_4514		baseplate wedge subunit and tail pin	3	3	1	1	149	1	4377		659	659	659
group_4515		baseplate wedge subunit and tail pin protein	3	3	1	1	148	1	4376		1817	1817	1817
9		gp9 base plate wedge completion tail fiber socket protein	3	3	1	1	147	1	4375		866	866	866
group_4517		baseplate wedge subunit	3	3	1	1	146	1	4374		1004	1004	1004
group_4518		baseplate wedge initiator	3	3	1	1	145	1	4373		3092	3092	3092
group_4519		baseplate wedge subunit	3	3	1	1	144	1	4372		1949	1949	1949
group_4520		hypothetical protein	3	3	1	1	143	1	4371		275	275	275
group_4521		hypothetical protein	3	3	1	1	142	1	4370		458	458	458
group_4522		baseplate hub subunit and tail lysozyme	3	3	1	1	141	1	4369		1784	1784	1784
group_4523		baseplate wedge subunit	3	3	1	1	140	1	4368		593	593	593
4		gp4 head completion protein	3	3	1	1	139	1	4367		449	449	449
2		gp2 DNA end protector protein	3	3	1	1	138	1	4366		839	839	839
group_4526		tail completion and sheath stabilizer protein	3	3	1	1	137	1	4365		569	569	569
group_4527		dNMP kinase	3	3	1	1	136	1	4364		737	737	737
group_4528		hypothetical protein	3	3	1	1	135	1	4363		239	239	239
group_4529		hypothetical protein	3	3	1	1	133	1	4361		215	215	215
group_4530		hypothetical protein	3	3	1	1	132	1	4360		248	248	248
group_4532		hypothetical protein	3	3	1	1	130	1	4358		242	242	242
group_4533		hypothetical protein ORF037	3	3	1	1	129	1	4357		236	236	236
group_4534		hypothetical protein	3	3	1	1	126	1	4354		632	632	632
group_4535		hypothetical protein	3	3	1	1	125	1	4353		473	473	473
group_4536		hypothetical protein	3	3	1	1	124	1	4352		260	260	260
group_4537		putative truncated Seg-like homing endonuclease	3	3	1	1	123	1	4351		437	437	437
group_4538		hypothetical protein	3	3	1	1	122	1	4350		521	521	521
vs		Vs valyl-tRNA synthetase modifier	3	3	1	1	121	1	4349		329	329	329
group_4540		hypothetical protein	3	3	1	1	120	1	4348		425	425	425
group_4541		hypothetical protein	3	3	1	1	119	1	4347		299	299	299
rI		lysis inhibition regulator	3	3	1	1	118	1	4346		278	278	278
group_4543		putative C4-type zinc finger protein	3	3	1	1	117	1	4345		266	266	266
group_4544		hypothetical protein	3	3	1	1	116	1	4344		461	461	461
group_4545		hypothetical protein	3	3	1	1	115	1	4343		251	251	251
group_4547		hypothetical protein	3	3	1	1	113	1	4340		209	209	209
group_4548		hypothetical protein	3	3	1	1	112	1	4339		281	281	281
group_4549		hypothetical protein	3	3	1	1	111	1	4338		1007	1007	1007
group_4550		hypothetical protein	3	3	1	1	110	1	4337		314	314	314
group_4551		hypothetical protein	3	3	1	1	109	1	4336		809	809	809
group_4552		hypothetical protein	3	3	1	1	108	1	4416		299	299	299
group_4553		hypothetical protein	3	3	1	1	107	1	4417		317	317	317
group_4554		hypothetical protein	3	3	1	1	105	1	4419		623	623	623
PHI92_gene_196		Phi92_gp196	3	3	1	1	104	1	4420		584	584	584
nrdC		thioredoxin	3	3	1	1	103	1	4421		278	278	278
group_4557		hypothetical protein	3	3	1	1	102	1	4422		311	311	311
group_4558		hypothetical protein	3	3	1	1	101	1	4423		299	299	299
group_4559		hypothetical protein	3	3	1	1	100	1	4424		275	275	275
49		gp49 recombinase endonuclease VII	3	3	1	1	99	1	4425		482	482	482
group_4561		hypothetical protein	3	3	1	1	98	1	4426		254	254	254
nrdH		glutaredoxin	3	3	1	1	97	1	4427		281	281	281
group_4563		sigma factor	3	3	1	1	95	1	4429		542	542	542
g066		phage protein	3	3	1	1	93	1	4431		362	362	362
47		gp47 recombination endonuclease subunit	3	3	1	1	92	1	4432		1010	1010	1010
group_4566		hypothetical protein	3	3	1	1	91	1	4433		257	257	257
group_4567		putative serine/threonine protein phosphatase	3	3	1	1	90	1	4434		611	611	611
group_4568		recombination endonuclease subunit	3	3	1	1	89	1	4435		1685	1685	1685
group_4569		hypothetical protein	3	3	1	1	88	1	4436		197	197	197
group_4570		hypothetical protein	3	3	1	1	87	1	4437		200	200	200
group_4571		hypothetical protein	3	3	1	1	86	1	4438		236	236	236
rpbA		RpbA RNA polymerase binding protein	3	3	1	1	85	1	4439		374	374	374
group_4573		DNA polymerase accessory protein, sliding clamp	3	3	1	1	84	1	4440		689	689	689
44		gp44 clamp loader subunit	3	3	1	1	83	1	4441		980	980	980
group_4575		DNA polymerase accessory protein, clamp-loader subunit	3	3	1	1	82	1	4442		569	569	569
regA		translational repressor protein	3	3	1	1	81	1	4443		383	383	383
group_4577		hypothetical protein	3	3	1	1	80	1	4444		233	233	233
43A		gp43A split DNA polymerase	3	3	1	1	313	1	4445		1508	1508	1508
group_4579		hypothetical protein	3	3	1	1	314	1	4446		290	290	290
group_4580		hypothetical protein	3	3	1	1	316	1	4448		314	314	314
group_4581		hypothetical protein	3	3	1	1	317	1	4449		317	317	317
group_4582		hypothetical protein	3	3	1	1	318	1	4450		197	197	197
group_4583		hypothetical protein	3	3	1	1	319	1	4451		164	164	164
group_4584		split DNA polymerase	3	3	1	1	320	1	4452		1172	1172	1172
group_4585		hypothetical protein	3	3	1	1	321	1	4453		302	302	302
group_4586		hypothetical protein	3	3	1	1	322	1	4454		311	311	311
group_4587		hypothetical protein	3	3	1	1	323	1	4455		293	293	293
group_4588		hypothetical protein	3	3	1	1	324	1	4456		353	353	353
group_4589		hypothetical protein	3	3	1	1	325	1	4457		452	452	452
group_4590		hypothetical protein	3	3	1	1	326	1	4458		323	323	323
group_4591		RB69ORF055c hypothetical protein	3	3	1	1	327	1	4459		629	629	629
g053		RB69ORF052c hypothetical protein	3	3	1	1	328	1	4460		1661	1661	1661
group_4593		putative thymidylate synthase	3	3	1	1	330	1	4462		707	707	707
g046		RB69ORF047c hypothetical protein	3	3	1	1	331	1	4463		944	944	944
group_4595		RB69ORF045c hypothetical protein	3	3	1	1	332	1	4464		542	542	542
group_4596		RB69ORF003c hypothetical protein	3	3	1	1	333	1	4465		1121	1121	1121
group_4597		RB69ORF003c hypothetical protein	3	3	1	1	334	1	4466		1118	1118	1118
40		gp40 head vertex assembly chaperone	3	3	1	1	335	1	4467		302	302	302
group_4599		DNA primase-helicase subunit	3	3	1	1	336	1	4468		1496	1496	1496
group_4600		hypothetical protein	3	3	1	1	338	1	4470		176	176	176
group_4601		hypothetical protein	3	3	1	1	339	1	4471		239	239	239
group_4602		hypothetical protein	3	3	1	1	340	1	4472		314	314	314
group_4603		hypothetical protein	3	3	1	1	341	1	4473		173	173	173
group_4604		RB69ORF134c hypothetical protein	3	3	1	1	342	1	4474		953	953	953
group_4605		hypothetical protein	3	3	1	1	343	1	4475		155	155	155
group_4606		RB69ORF040c hypothetical protein	3	3	1	1	344	1	4476		314	314	314
group_4607		hypothetical protein	3	3	1	1	345	1	4477		509	509	509
group_4608		hypothetical protein	3	3	1	1	346	1	4478		374	374	374
group_4609		hypothetical protein	3	3	1	1	348	1	4480		347	347	347
group_4610		hypothetical protein	3	3	1	1	349	1	4481		476	476	476
group_4611		DNA primase subunit	3	3	1	1	350	1	4482		1031	1031	1031
group_4612		hypothetical protein	3	3	1	1	351	1	4483		353	353	353
group_4613		hypothetical protein	3	3	1	1	352	1	4484		482	482	482
group_4614		hypothetical protein	3	3	1	1	353	1	4485		332	332	332
group_4615		hypothetical protein	3	3	1	1	355	1	4487		320	320	320
141		gp141	3	3	1	1	362	1	4494		509	509	509
group_4618		hypothetical protein	3	3	1	1	363	1	4495		431	431	431
group_4619		hypothetical protein	3	3	1	1	364	1	4496		353	353	353
group_4620		hypothetical protein	3	3	1	1	365	1	4497		248	248	248
group_4621		hypothetical protein	3	3	1	1	366	1	4498		407	407	407
group_4622		hypothetical protein	3	3	1	1	367	1	4499		359	359	359
group_4626		hypothetical protein	3	3	1	1	373	1	4506		206	206	206
group_4627		hypothetical protein	3	3	1	1	376	1	4509		191	191	191
group_4628		hypothetical protein	3	3	1	1	377	1	4510		188	188	188
group_4629		hypothetical protein	3	3	1	1	378	1	4511		443	443	443
group_4630		hypothetical protein	3	3	1	1	379	1	4512		95	95	95
srd		putative anti-sigma factor	3	3	1	1	380	1	4513		953	953	953
group_4632		hypothetical protein	3	3	1	1	381	1	4514		422	422	422
group_4633		hypothetical protein	3	3	1	1	382	1	4515		365	365	365
group_4634		hypothetical protein	3	3	1	1	383	1	4516		296	296	296
dda		Dda DNA helicase	3	3	1	1	384	1	4517		1358	1358	1358
group_4636		hypothetical protein	3	3	1	1	385	1	4518		242	242	242
group_4637		hypothetical protein	3	3	1	1	388	1	4521		317	317	317
dexA		DexA exonuclease A	3	3	1	1	390	1	4523		659	659	659
cef		cef	3	3	1	1	391	1	4524		242	242	242
group_4641		hypothetical protein	3	3	1	1	392	1	4525		404	404	404
group_4642		putative lysozyme	3	3	1	1	393	1	4526		566	566	566
60plus39		gp60plus39 DNA topoisomerase subunit	3	3	1	1	394	1	4527		1817	1817	1817
group_4644		hypothetical protein	3	3	1	1	395	1	4528		359	359	359
group_4645		hypothetical protein	3	3	1	1	396	1	4529		194	194	194
rnlB		RnlB RNA ligase 2	3	3	1	1	397	1	4530		1007	1007	1007
group_4647		hypothetical protein	3	3	1	1	398	1	4531		359	359	359
group_4649		hypothetical protein	3	3	1	1	400	1	4533		536	536	536
group_4650		hypothetical protein	3	3	1	1	401	1	4534		284	284	284
group_4651		putative glutathionylspermidine synthase	3	3	1	1	402	1	4536		1268	1268	1268
group_4652		hypothetical protein	3	3	1	1	403	1	4537		125	125	125
group_4653		hypothetical protein	3	3	1	1	404	1	4538		200	200	200
rIIA		protector from prophage-induced early lysis	3	3	1	1	405	1	4539		2207	2207	2207
group_4655		hypothetical protein	3	3	1	1	406	1	4540		101	101	101
rIIB		rIIB protector from prophage-induced early lysis	3	3	1	1	407	1	4541		1286	1286	1286
denB		DenB DNA endonuclease IV	3	3	1	1	408	1	4542		602	602	602
ndd		nucleoid disruption protein	3	3	1	1	409	1	4543		458	458	458
group_4659		hypothetical protein	3	3	1	1	410	1	4544		158	158	158
52		gp52 topoisomerase II medium subunit	3	3	1	1	411	1	4545		1343	1343	1343
motA		MotA activator of middle period transcription	3	3	1	1	412	1	4546		617	617	617
asiA		AsiA anti-sigma 70 protein	3	3	1	1	413	1	4547		275	275	275
t		holin lysis mediator	3	3	1	1	443	1	4564		731	731	731
group_4664		hinge connector of long tail fiber distal connector	3	3	1	1	441	1	4562		713	713	713
35		gp35 hinge connector of long tail fiber proximal connector	3	3	1	1	440	1	4561		1130	1130	1130
34		gp34 long tail fiber proximal subunit	3	3	1	1	439	1	4560		3920	3920	3920
rnh		RNaseH ribonuclease	3	3	1	1	438	1	4559		1082	1082	1082
group_4668		hypothetical protein	3	3	1	1	437	1	4558		230	230	230
dsbA		DsbA dsDNA binding protein	3	3	1	1	436	1	4557		266	266	266
group_4670		late promoter transcription accessory protein	3	3	1	1	435	1	4556		299	299	299
group_4671		loader of gp41 DNA helicase	3	3	1	1	434	1	4555		650	650	650
32		gp32 single-stranded DNA binding protein	3	3	1	1	433	1	4554		926	926	926
frd		Frd dihydrofolate reductase	3	3	1	1	427	1	4308		551	551	551
group_4676		hypothetical protein	3	3	1	1	426	1	4309		236	236	236
td		dTMP (thymidylate) synthase	3	3	1	1	425	1	4310		947	947	947
group_4678		hypothetical protein	3	3	1	1	424	1	4311	Hypothetical protein with no hits to refseq/uniprot/clusters/cdd/tigrfams/pfam overlapping another protein with hits	212	212	212
group_4679		hypothetical protein	3	3	1	1	423	1	4312		329	329	329
nrdA		aerobic NDP reductase large subunit	3	3	1	1	422	1	4313		2411	2411	2411
nrdB		NrdB aerobic NDP reductase small subunit	3	3	1	1	421	1	4314		1151	1151	1151
rnlA		RnlA RNA ligase 1 and tail fiber attachment catalyst	3	3	1	1	420	1	4315		1145	1145	1145
group_4683		hypothetical protein	3	3	1	1	419	1	4316		236	236	236
alc		inhibitor of host transcription	3	3	1	1	418	1	4317		485	485	485
group_4685		hypothetical protein	3	3	1	1	417	1	4318		179	179	179
group_4686		hypothetical protein	3	3	1	1	416	1	4319		320	320	320
group_4687		hypothetical protein	3	3	1	1	185	1	4322		527	527	527
group_4688		hypothetical protein	3	3	1	1	186	1	4323		314	314	314
cd		dCMP deaminase	3	3	1	1	187	1	4324		551	551	551
group_4690		hypothetical protein	3	3	1	1	188	1	4325		341	341	341
31		gp31 head assembly cochaperone with GroEL	3	3	1	1	189	1	4326		329	329	329
rIII		rIII lysis inhibition accessory protein	3	3	1	1	190	1	4327		242	242	242
group_4695		hypothetical protein	3	3	1	1	195	1	4330		482	482	482
30		gp30 DNA ligase	3	3	1	1	197	1	4332		1490	1490	1490
group_4697		hypothetical protein	3	3	1	1	198	1	4333		182	182	182
alt		Alt RNA polymerase ADP-ribosylase	3	3	1	1	199	1	4334		2081	2081	2081
group_4699		baseplate tail tube initiator	3	3	1	1	200	1	4335		878	878	878
group_4709		hypothetical protein	3	3	1	2	39	2	21		398	398	398			P521_00014
group_4717		DNA ligase	3	3	1	2	53	2	106		977	977	977								T92_00028
group_4720		hypothetical protein	3	3	1	2	50	2	40		224	224	224								T92_00035
group_4721		hypothetical protein	3	3	1	2	49	2	41		227	227	227								T92_00036
group_4722		hypothetical protein	3	3	1	2	48	2	42		188	188	188								T92_00037
group_4723		hypothetical protein	3	3	1	2	32	2	43		179	179	179								T92_00038
group_4724		hypothetical protein	3	3	1	2	33	2	44		452	452	452								T92_00039
group_4728		hypothetical protein	3	3	1	2	25	2	37		374	374	374								T92_00045
group_4729		hypothetical protein	3	3	1	2	27	2	57		215	215	215								T92_00047
group_4749		putative Hef-like homing endonuclease	3	3	1	1	168	1	4396		1424	1427	1425
group_4758		hypothetical protein	3	3	1	1	361	1	4493		314	317	315
group_4760		hypothetical protein	3	3	1	1	354	1	4486		437	440	438
group_54		phage putative head morphogenesis protein	3	3	1	1	3994	1	2760		134	1103	780	P1033_00014
group_78		hypothetical protein	3	3	1	1	3978	1	1076		368	413	398	P1033_00006
group_1		IS6 family transposase IS1007	2	2	1	1	3166	1	2928		278	278	278
nepI_3		hypothetical protein	2	2	1	1	3297	1	607		1214	3374	2294
group_1002		hypothetical protein	2	2	1	1	892	1	2966		419	419	419
group_1003		hypothetical protein	2	2	1	1	893	1	2965		395	395	395
group_1004		hypothetical protein	2	2	1	1	894	1	2964		188	188	188
group_1005		DNA methylase	2	2	1	1	895	1	2963		761	761	761
group_1006		hypothetical protein	2	2	1	1	896	1	2962		839	839	839
group_1007		hypothetical protein	2	2	1	1	899	1	2956		326	326	326
group_1008		hypothetical protein	2	2	1	1	900	1	2955		248	248	248
cI		repressor	2	2	1	1	901	1	2954		689	689	689
vibB		Vibriobactin-specific isochorismatase	2	2	1	1	725	1	957		536	641	588
group_1010		hypothetical protein	2	2	1	1	902	1	2953		338	338	338
group_1011		hypothetical protein	2	2	1	1	907	1	2950		596	596	596
group_1012		hypothetical protein	2	2	1	1	908	1	2949		857	857	857
group_1013		putative exonuclease	2	2	1	1	909	1	2948		608	608	608
group_1014		hypothetical protein	2	2	1	1	911	1	2940		431	431	431
group_1015		hypothetical protein	2	2	1	1	3162	1	2939		209	209	209
group_1017		hypothetical protein	2	2	1	1	2704	1	4075		377	377	377
group_1019		hypothetical protein	2	2	1	1	3160	1	2935		269	269	269
group_1020		integrase	2	2	1	1	3159	1	1017		986	986	986
yadG		putative ABC transporter ATP-binding protein YadG	2	2	1	1	2898	1	420		935	935	935
yadH		Inner membrane transport permease YadH	2	2	1	1	2696	1	419		773	773	773
group_1023		GTP cyclohydrolase I family protein	2	2	1	1	2695	1	418		812	812	812
group_1024		hypothetical protein	2	2	1	1	2694	1	417		650	650	650
mrdB		Peptidoglycan glycosyltransferase MrdB	2	2	1	1	2693	1	416		1142	1142	1142
mltB		Membrane-bound lytic murein transglycosylase B	2	2	1	1	2692	1	415		1001	1001	1001
rlpA		Endolytic peptidoglycan transglycosylase RlpA	2	2	1	1	2691	1	414		617	617	617
group_1028		hypothetical protein	2	2	1	1	2690	1	413		149	149	149
group_1029		hypothetical protein	2	2	1	1	2689	1	412		452	452	452
group_103		zinc-containing alcohol dehydrogenase superfamily protein	2	2	1	1	665	1	3781		866	1109	987
group_1030		hypothetical protein	2	2	1	1	2688	1	411		317	317	317
group_1031		hypothetical protein	2	2	1	1	2687	1	410		716	716	716
rhaS_4		HTH-type transcriptional activator RhaS	2	2	1	1	2686	1	409		824	824	824
group_1033		hypothetical protein	2	2	1	1	2685	1	408		485	485	485
tsf		Elongation factor Ts	2	2	1	1	2684	1	407		875	875	875
rpsB		30S ribosomal protein S2	2	2	1	1	2683	1	406		752	752	752
map_2		Methionine aminopeptidase	2	2	1	1	2682	1	405		827	827	827
group_1037		hypothetical protein	2	2	1	1	2681	1	404		1118	1118	1118
nrtP		Nitrate/nitrite transporter NrtP	2	2	1	1	2680	1	403		1346	1346	1346
group_1039		L-lactate transporter	2	2	1	1	2679	1	402		1214	1214	1214
group_1040		hypothetical protein	2	2	1	1	2678	1	401		134	134	134
sthA		Soluble pyridine nucleotide transhydrogenase	2	2	1	1	2677	1	400		1412	1412	1412
lipA_1		Lipoyl synthase	2	2	1	1	2676	1	399		1013	1013	1013
fadE		Acyl-coenzyme A dehydrogenase	2	2	1	1	2675	1	398		2465	2465	2465
group_1044		hypothetical protein	2	2	1	1	2674	1	397		383	383	383
group_1045		hypothetical protein	2	2	1	1	2673	1	396		536	536	536
ahcY		Adenosylhomocysteinase	2	2	1	1	2672	1	395		1382	1382	1382
metF		5,10-methylenetetrahydrofolate reductase	2	2	1	1	2671	1	394		836	836	836
group_1048	rsmE_2	Ribosomal RNA small subunit methyltransferase E	2	2	1	1	2670	1	2098		722	722	722
group_1049		hypothetical protein	2	2	1	1	2669	1	2099		2849	2849	2849
smf-1_2		Major fimbrial subunit SMF-1	2	2	1	1	3351	1	1083		533	536	534
maeB		NADP-dependent malic enzyme	2	2	1	1	2668	1	2100		2270	2270	2270
159		tRNA nucleotidyl transferase	2	2	1	1	2667	1	2101		1238	1238	1238
degS		Serine endoprotease DegS	2	2	1	1	2666	1	2102		1175	1175	1175
group_1053		GTP cyclohydrolase 1 type 2	2	2	1	1	2665	1	2103		758	758	758
sodB		Superoxide dismutase [Fe]	2	2	1	1	2664	1	2104		626	626	626
pdhD		Dihydrolipoyl dehydrogenase	2	2	1	1	2662	1	2097		1373	1373	1373
group_1056		hypothetical protein	2	2	1	1	2661	1	2096		1478	1478	1478
blh_1		Beta-lactamase hydrolase-like protein	2	2	1	1	2660	1	2095		335	335	335
aidA_1		Quorum-quenching protein AidA	2	2	1	1	2659	1	2094		896	896	896
trxC		Thioredoxin 2	2	2	1	1	2658	1	2093		437	437	437
group_1060		putative acyl-CoA thioester hydrolase	2	2	1	1	2657	1	2092		422	422	422
group_1061		hypothetical protein	2	2	1	1	2656	1	2091		494	494	494
group_1062		hypothetical protein	2	2	1	1	2655	1	2090		488	488	488
group_1063		hypothetical protein	2	2	1	1	2654	1	2089		314	314	314
mnmC		tRNA 5-methylaminomethyl-2-thiouridine biosynthesis bifunctional protein MnmC	2	2	1	1	2653	1	2088		1871	1871	1871
group_1065		hypothetical protein	2	2	1	1	2652	1	2087		479	479	479
yciI		Protein YciI	2	2	1	1	2651	1	2086		302	302	302
yciB		Intracellular septation protein	2	2	1	1	2650	1	2085		614	614	614
yciV		5'-3' exoribonuclease	2	2	1	1	2649	1	2084		851	851	851
group_1069		hypothetical protein	2	2	1	1	2648	1	2083		911	911	911
group_107		hypothetical protein	2	2	1	1	982	1	2748		572	803	687
group_1070		hypothetical protein	2	2	1	1	2647	1	2082		707	707	707
group_1071		hypothetical protein	2	2	1	1	2646	1	2081		1253	1253	1253
secF		Protein translocase subunit SecF	2	2	1	1	2645	1	2080		962	962	962
secD		Protein translocase subunit SecD	2	2	1	1	2644	1	2079		1901	1901	1901
yajC		Sec translocon accessory complex subunit YajC	2	2	1	1	2643	1	2078		329	329	329
tgt		Queuine tRNA-ribosyltransferase	2	2	1	1	2642	1	2077		1133	1133	1133
group_1076		hypothetical protein	2	2	1	1	2641	1	2076		569	569	569
group_1077		hypothetical protein	2	2	1	1	2640	1	2075		1028	1028	1028
queA		S-adenosylmethionine:tRNA ribosyltransferase-isomerase	2	2	1	1	2639	1	2074		1037	1037	1037
rcsC_3		Sensor histidine kinase RcsC	2	2	1	1	2638	1	2073		1268	1268	1268
glnE		Bifunctional glutamine synthetase adenylyltransferase/adenylyl-removing enzyme	2	2	1	1	2637	1	2072		2750	2750	2750
ilvE		Branched-chain-amino-acid aminotransferase	2	2	1	1	2636	1	2071		926	926	926
group_1082		hypothetical protein	2	2	1	1	2635	1	2070		887	887	887
icaB		Poly-beta-1,6-N-acetyl-D-glucosamine N-deacetylase	2	2	1	1	2634	1	2069		809	809	809
group_1084		hypothetical protein	2	2	1	1	2633	1	2068		983	983	983
group_1085		hypothetical protein	2	2	1	1	2632	1	2067		1043	1043	1043
group_1086		putative dTDP-glucose 4,6-dehydratase	2	2	1	1	2631	1	2066		1067	1067	1067
PHI92_gene_1		Phi92_gp064	2	2	1	1	2630	1	2065		893	893	893
PHI92_gene_2		Phi92_gp066	2	2	1	1	2629	1	2064		890	890	890
PHI92_gene_3		Phi92_gp065	2	2	1	1	2628	1	2063		551	551	551
group_109		putative nicotinamide phosphoribosyl transferase	2	2	1	1	3380	1	2740		902	1493	1197
group_1090		hypothetical protein	2	2	1	1	2627	1	2062		1019	1019	1019
group_1091		hypothetical protein	2	2	1	1	2626	1	2061		938	938	938
group_1092		hypothetical protein	2	2	1	1	2625	1	2060		218	218	218
aspS		Aspartate--tRNA(Asp/Asn) ligase	2	2	1	1	2624	1	2059		1778	1778	1778
group_1094		hypothetical protein	2	2	1	1	2623	1	2058		764	764	764
group_1095		putative TonB-dependent receptor	2	2	1	1	2622	1	2057		2075	2075	2075
clsA		Cardiolipin synthase A	2	2	1	1	2621	1	2056		1463	1463	1463
group_1097		hypothetical protein	2	2	1	1	2620	1	2055		446	446	446
group_1098		hypothetical protein	2	2	1	1	2619	1	2054		380	380	380
psiE		Protein PsiE	2	2	1	1	2618	1	2053		482	482	482
dmdC_2		3-methylmercaptopropionyl-CoA dehydrogenase	2	2	1	1	2617	1	2052		1781	1781	1781
dmdC_3		3-methylmercaptopropionyl-CoA dehydrogenase	2	2	1	1	2616	1	2051		1802	1802	1802
group_1102		hypothetical protein	2	2	1	1	2615	1	2050		380	380	380
rcsC_4		Sensor histidine kinase RcsC	2	2	1	1	2614	1	2049		1658	1658	1658
baeR		Transcriptional regulatory protein BaeR	2	2	1	1	2613	1	2048		686	686	686
selO		Protein adenylyltransferase SelO	2	2	1	1	2612	1	2047		1442	1442	1442
group_1106		hypothetical protein	2	2	1	1	2611	1	2046		1172	1172	1172
group_1107		hypothetical protein	2	2	1	1	2610	1	2045		530	530	530
group_1108		hypothetical protein	2	2	1	1	2609	1	2044		719	719	719
cobO		Cobalamin adenosyltransferase	2	2	1	1	2608	1	2043		578	578	578
group_111		hypothetical protein	2	2	1	1	3424	1	2802		758	1262	1010
btuB_1		Vitamin B12 transporter BtuB	2	2	1	1	2607	1	2042		1871	1871	1871
trpF		N-(5'-phosphoribosyl)anthranilate isomerase	2	2	1	1	2606	1	2041		659	659	659
trpB_1		Tryptophan synthase beta chain	2	2	1	1	2605	1	2040		1229	1229	1229
group_1113		hypothetical protein	2	2	1	1	2604	1	2039		512	512	512
group_1114		hypothetical protein	2	2	1	1	2603	1	2038		995	995	995
group_1115		hypothetical protein	2	2	1	1	2602	1	2037		875	875	875
group_1116		hypothetical protein	2	2	1	1	2601	1	2036		1049	1049	1049
trpA		Tryptophan synthase alpha chain	2	2	1	1	2600	1	2035		803	803	803
accD		Acetyl-coenzyme A carboxylase carboxyl transferase subunit beta	2	2	1	1	2599	1	2034		896	896	896
folC		Dihydrofolate synthase/folylpolyglutamate synthase	2	2	1	1	2598	1	2033		1286	1286	1286
group_1120		hypothetical protein	2	2	1	1	2597	1	2032		1070	1070	1070
group_1121		hypothetical protein	2	2	1	1	2596	1	2031		578	578	578
group_1122		putative metallo-hydrolase	2	2	1	1	2595	1	2030		776	776	776
group_1123		Peroxiredoxin	2	2	1	1	2594	1	2029		641	641	641
secA		Protein translocase subunit SecA	2	2	1	1	2593	1	2028		2723	2723	2723
group_1125		hypothetical protein	2	2	1	1	2592	1	2027		443	443	443
group_1126		gp59	2	2	1	1	2591	1	2026		1310	1310	1310
group_1127		hypothetical protein	2	2	1	1	2590	1	2025		629	629	629
group_1128		hypothetical protein	2	2	1	1	2589	1	2024		1211	1211	1211
group_1129		Acetyltransferase	2	2	1	1	2588	1	2023		419	419	419
group_1130		hypothetical protein	2	2	1	1	2587	1	2022		860	860	860
group_1131		hypothetical protein	2	2	1	1	2586	1	2021		254	254	254
fadJ_1		Fatty acid oxidation complex subunit alpha	2	2	1	1	2585	1	2020		2135	2135	2135
fadA_1		Putative acyltransferase	2	2	1	1	2584	1	2019		1205	1205	1205
group_1134		putative HTH-type transcriptional regulator	2	2	1	1	2583	1	2018		1010	1010	1010
yfdE		Acetyl-CoA:oxalate CoA-transferase	2	2	1	1	2582	1	2017		1118	1118	1118
oprB_1		Porin B	2	2	1	1	2581	1	2016		1253	1253	1253
gcd		Quinoprotein glucose dehydrogenase	2	2	1	1	2580	1	2015		2405	2405	2405
sir		Sulfite reductase [ferredoxin]	2	2	1	1	2579	1	2014		1643	1643	1643
group_1139		hypothetical protein	2	2	1	1	2578	1	2013		485	485	485
group_114		phage tail assembly protein	2	2	1	1	3301	1	595		572	665	618
group_1140		putative quaternary ammonium compound-resistance protein qacE	2	2	1	1	2577	1	2012		353	353	353
group_1141		hypothetical protein	2	2	1	1	2576	1	2011		443	443	443
thlA_1		Acetyl-CoA acetyltransferase	2	2	1	1	2575	1	2010		1175	1175	1175
group_1143		hypothetical protein	2	2	1	1	2574	1	2009		515	515	515
group_1144		Outer membrane protein Omp38	2	2	1	1	2573	1	2008		1028	1028	1028
group_1145		hypothetical protein	2	2	1	1	2572	1	2007		158	158	158
group_1146		putative RtcB-like protein	2	2	1	1	2571	1	2006		1205	1205	1205
lysP		Lysine-specific permease	2	2	1	1	2570	1	2005		1460	1460	1460
rsmC		Ribosomal RNA small subunit methyltransferase C	2	2	1	1	2569	1	2004		1013	1013	1013
xanP		Xanthine permease XanP	2	2	1	1	2568	1	2003		1358	1358	1358
group_115		hypothetical protein	2	2	1	1	4017	1	4040		347	962	654
typA		GTP-binding protein TypA/BipA	2	2	1	1	2567	1	2002		1835	1835	1835
mscL		Large-conductance mechanosensitive channel	2	2	1	1	2566	1	2001		431	431	431
group_1152		hypothetical protein	2	2	1	1	2565	1	2000		353	353	353
ppiC		Peptidyl-prolyl cis-trans isomerase C	2	2	1	1	2564	1	1999		290	290	290
292		gp292	2	2	1	1	2563	1	1998		824	824	824
group_1155		Putative 3-methyladenine DNA glycosylase	2	2	1	1	2562	1	1997		566	566	566
btuB_2		Vitamin B12 transporter BtuB	2	2	1	1	2561	1	1996		2204	2204	2204
namA_1		NADPH dehydrogenase	2	2	1	1	2560	1	1995		1109	1109	1109
group_1158		hypothetical protein	2	2	1	1	2559	1	1994		923	923	923
group_1159		hypothetical protein	2	2	1	1	2558	1	1993		824	824	824
dsbC_1		putative thiol:disulfide interchange protein DsbC	2	2	1	1	2557	1	1992		710	710	710
ygfZ		tRNA-modifying protein YgfZ	2	2	1	1	2556	1	1991		722	722	722
group_1162		hypothetical protein	2	2	1	1	2555	1	1990		449	449	449
group_1163		hypothetical protein	2	2	1	1	2554	1	1989		356	356	356
group_1164		hypothetical protein	2	2	1	1	2553	1	1988		344	344	344
group_1165		hypothetical protein	2	2	1	1	2552	1	1987		341	341	341
proS		Proline--tRNA ligase	2	2	1	1	2551	1	1986		1715	1715	1715
mdtC		Multidrug resistance protein MdtC	2	2	1	1	2550	1	1985		3098	3098	3098
mdtA_1		Multidrug resistance protein MdtA	2	2	1	1	2549	1	1984		1118	1118	1118
group_1169		hypothetical protein	2	2	1	1	2548	1	1983		638	638	638
group_117		hypothetical protein	2	2	1	1	487	1	3989		776	1304	1040
phoP		Alkaline phosphatase synthesis transcriptional regulatory protein PhoP	2	2	1	1	2547	1	1982		383	383	383
pleD		Response regulator PleD	2	2	1	1	2546	1	1981		362	362	362
group_1172		hypothetical protein	2	2	1	1	2545	1	1980		536	536	536
group_1173		hypothetical protein	2	2	1	1	2544	1	1979		2078	2078	2078
rcsC_5		Sensor histidine kinase RcsC	2	2	1	1	2543	1	1978		4520	4520	4520
group_1175		hypothetical protein	2	2	1	1	2542	1	1977		464	464	464
dapE		Succinyl-diaminopimelate desuccinylase	2	2	1	1	2541	1	1976		1136	1136	1136
group_1177		hypothetical protein	2	2	1	1	2540	1	1975		140	140	140
group_1178		hypothetical protein	2	2	1	1	2539	1	1974		908	908	908
ybaN		Inner membrane protein YbaN	2	2	1	1	2538	1	1973		368	368	368
group_1180		hypothetical protein	2	2	1	1	2537	1	1972		503	503	503
group_1181		hypothetical protein	2	2	1	1	2536	1	1971		785	785	785
group_1182		hypothetical protein	2	2	1	1	2535	1	1970		2546	2546	2546
group_1183		hypothetical protein	2	2	1	1	2534	1	1969		575	575	575
yccS_1		Inner membrane protein YccS	2	2	1	1	2533	1	1968		2078	2078	2078
bcr_1		Bicyclomycin resistance protein	2	2	1	1	2532	1	1967		1214	1214	1214
cnbA		Chloronitrobenzene nitroreductase	2	2	1	1	2531	1	1966		704	704	704
group_1187		hypothetical protein	2	2	1	1	2530	1	1965		203	203	203
alsT_1		Amino-acid carrier protein AlsT	2	2	1	1	2529	1	1964		596	596	596
alsT_2		Amino-acid carrier protein AlsT	2	2	1	1	2528	1	1963		932	932	932
group_119		hypothetical protein	2	2	1	1	1000	1	2912		710	710	710
group_1190		hypothetical protein	2	2	1	1	2527	1	1962		935	935	935
tdcB		L-threonine ammonia-lyase	2	2	1	1	2526	1	1961		1235	1235	1235
sbmA		Peptide antibiotic transporter SbmA	2	2	1	1	2525	1	1960		1124	1124	1124
pepO		Neutral endopeptidase	2	2	1	1	2524	1	1959		2048	2048	2048
group_1194		hypothetical protein	2	2	1	1	2523	1	1958		749	749	749
group_1195		hypothetical protein	2	2	1	1	2522	1	1957		1067	1067	1067
group_1196		hypothetical protein	2	2	1	1	2521	1	1956		518	518	518
yhbO		Protein/nucleic acid deglycase 2	2	2	1	1	2520	1	1955		578	578	578
gatB		Aspartyl/glutamyl-tRNA(Asn/Gln) amidotransferase subunit B	2	2	1	1	2519	1	1954		1469	1469	1469
gatA_1		Glutamyl-tRNA(Gln) amidotransferase subunit A	2	2	1	1	2518	1	1953		1478	1478	1478
gatC		Glutamyl-tRNA(Gln) amidotransferase subunit C	2	2	1	1	2517	1	1952		314	314	314
mreB		Cell shape-determining protein MreB	2	2	1	1	2516	1	1951		1040	1040	1040
mreC		Cell shape-determining protein MreC	2	2	1	1	2515	1	1950		857	857	857
group_1203		hypothetical protein	2	2	1	1	2514	1	1949		491	491	491
yhdE		dTTP/UTP pyrophosphatase	2	2	1	1	2513	1	1948		560	560	560
rng		Ribonuclease G	2	2	1	1	2512	1	1947		1454	1454	1454
group_1206		hypothetical protein	2	2	1	1	2511	1	1946		173	173	173
wax-dgaT		O-acyltransferase WSD	2	2	1	1	2510	1	1945		1385	1385	1385
cysH		Phosphoadenosine phosphosulfate reductase	2	2	1	1	2509	1	1944		734	734	734
thrH		Phosphoserine phosphatase ThrH	2	2	1	1	2508	1	1943		617	617	617
group_121		hypothetical protein	2	2	1	1	936	1	546		452	452	452
group_1210		hypothetical protein	2	2	1	1	2507	1	1942		1430	1430	1430
kefF_2		Glutathione-regulated potassium-efflux system ancillary protein KefF	2	2	1	1	2506	1	1941		698	698	698
group_1212		putative HTH-type transcriptional regulator	2	2	1	1	2505	1	1940		1034	1034	1034
group_1213		hypothetical protein	2	2	1	1	2504	1	1939		992	992	992
group_1214		hypothetical protein	2	2	1	1	2503	1	1938		800	800	800
uppP		Undecaprenyl-diphosphatase	2	2	1	1	2502	1	1937		818	818	818
rhaS_5		HTH-type transcriptional activator RhaS	2	2	1	1	2501	1	1936		893	893	893
ppsC		Phthiocerol synthesis polyketide synthase type I PpsC	2	2	1	1	2500	1	1935		998	998	998
group_1218	hchA_1	Protein/nucleic acid deglycase HchA	2	2	1	1	2499	1	1934		875	875	875
aroP_1		Aromatic amino acid transport protein AroP	2	2	1	1	2498	1	1933		1355	1355	1355
prpF		2-methyl-aconitate isomerase	2	2	1	1	2497	1	1932		1187	1187	1187
ispA		Farnesyl diphosphate synthase	2	2	1	1	2496	1	1931		911	911	911
group_1222		hypothetical protein	2	2	1	1	2495	1	1930		368	368	368
qmcA		Protein QmcA	2	2	1	1	2494	1	1929		854	854	854
group_1224		hypothetical protein	2	2	1	1	2493	1	1928		461	461	461
group_1225		hypothetical protein	2	2	1	1	2492	1	1927		917	917	917
group_1226		hypothetical protein	2	2	1	1	2491	1	1926		626	626	626
ampG		Anhydromuropeptide permease	2	2	1	1	2490	1	1925		1247	1247	1247
group_1228		hypothetical protein	2	2	1	1	2489	1	1924		1304	1304	1304
eptA		Phosphoethanolamine transferase EptA	2	2	1	1	2488	1	1923		1601	1601	1601
qseB_1		Transcriptional regulatory protein QseB	2	2	1	1	2487	1	1922		674	674	674
qseC_1		Sensor protein QseC	2	2	1	1	2486	1	1921		1334	1334	1334
group_1232		hypothetical protein	2	2	1	1	2485	1	1920		599	599	599
amtB_1		Ammonia channel	2	2	1	1	2484	1	1919		1187	1187	1187
cmpR_1		HTH-type transcriptional activator CmpR	2	2	1	1	2483	1	1918		884	884	884
group_1235		hypothetical protein	2	2	1	1	2482	1	1917		905	905	905
group_1236		hypothetical protein	2	2	1	1	2481	1	1916		1016	1016	1016
group_1237		hypothetical protein	2	2	1	1	2480	1	1915		578	578	578
valS		Valine--tRNA ligase	2	2	1	1	2479	1	1914		2879	2879	2879
group_1239		hypothetical protein	2	2	1	1	2478	1	1913		677	677	677
group_124		hypothetical protein	2	2	1	1	3987	1	4050		119	257	188
hcaB_2		3-phenylpropionate-dihydrodiol/cinnamic acid-dihydrodiol dehydrogenase	2	2	1	1	2477	1	1912		806	806	806
group_1241		hypothetical protein	2	2	1	1	2476	1	1911		434	434	434
group_1242		hypothetical protein	2	2	1	1	2475	1	1910		434	434	434
group_1243		hypothetical protein	2	2	1	1	2474	1	1909		350	350	350
oprM		Outer membrane protein OprM	2	2	1	1	2473	1	1908		1454	1454	1454
mexB_1		Multidrug resistance protein MexB	2	2	1	1	2472	1	1907		3176	3176	3176
acrA		Multidrug efflux pump subunit AcrA	2	2	1	1	2471	1	1906		1250	1250	1250
group_1247		hypothetical protein	2	2	1	1	2470	1	1905		626	626	626
group_1248		hypothetical protein	2	2	1	1	2469	1	1904		2060	2060	2060
sdsA		All-trans-nonaprenyl-diphosphate synthase (geranyl-diphosphate specific)	2	2	1	1	2468	1	1903		977	977	977
rplU		50S ribosomal protein L21	2	2	1	1	2467	1	1902		311	311	311
rpmA		50S ribosomal protein L27	2	2	1	1	2466	1	1901		257	257	257
lolA		Outer-membrane lipoprotein carrier protein	2	2	1	1	2465	1	1900		695	695	695
group_1253		hypothetical protein	2	2	1	1	2464	1	1899		788	788	788
serS		Serine--tRNA ligase	2	2	1	1	2463	1	1898		1271	1271	1271
cysG		Siroheme synthase	2	2	1	1	2462	1	1897		1373	1373	1373
trmL		tRNA (cytidine(34)-2'-O)-methyltransferase	2	2	1	1	2461	1	1896		473	473	473
yybR_1		putative HTH-type transcriptional regulator YybR	2	2	1	1	2460	1	1895		380	380	380
fldP_1		Flavodoxin FldP	2	2	1	1	2459	1	1894		560	560	560
plaP		Low-affinity putrescine importer PlaP	2	2	1	1	2458	1	1893		1400	1400	1400
group_126		hypothetical protein	2	2	1	1	941	1	4006		578	851	714
dhaT_1		1,3-propanediol dehydrogenase	2	2	1	1	2457	1	1892		1184	1184	1184
group_1261		hypothetical protein	2	2	1	1	2456	1	1891		533	533	533
lipB		Octanoyltransferase	2	2	1	1	2455	1	1890		653	653	653
group_1263		hypothetical protein	2	2	1	1	2454	1	1889		287	287	287
rpoD		RNA polymerase sigma factor RpoD	2	2	1	1	2453	1	1888		1886	1886	1886
group_1265		hypothetical protein	2	2	1	1	2452	1	1887		206	206	206
group_1266		hypothetical protein	2	2	1	1	2451	1	1886		524	524	524
glpE_2		Thiosulfate sulfurtransferase GlpE	2	2	1	1	2450	1	1885		932	932	932
group_1268		hypothetical protein	2	2	1	1	2449	1	1884		485	485	485
gltA		Citrate synthase	2	2	1	1	2448	1	1883		1274	1274	1274
group_1270		hypothetical protein	2	2	1	1	2447	1	1882		113	113	113
sdhC		Succinate dehydrogenase cytochrome b556 subunit	2	2	1	1	2446	1	1881		392	392	392
sdhD		Succinate dehydrogenase hydrophobic membrane anchor subunit	2	2	1	1	2445	1	1880		365	365	365
sdhA		Succinate dehydrogenase flavoprotein subunit	2	2	1	1	2444	1	1879		1835	1835	1835
sdhB		Succinate dehydrogenase iron-sulfur subunit	2	2	1	1	2443	1	1878		710	710	710
sucA		2-oxoglutarate dehydrogenase E1 component	2	2	1	1	2442	1	1877		2840	2840	2840
sucB		Dihydrolipoyllysine-residue succinyltransferase component of 2-oxoglutarate dehydrogenase complex	2	2	1	1	2441	1	1876		1196	1196	1196
lpdG		Dihydrolipoyl dehydrogenase	2	2	1	1	2440	1	1875		1433	1433	1433
sucC		Succinate--CoA ligase [ADP-forming] subunit beta	2	2	1	1	2439	1	1874		1166	1166	1166
sucD		Succinate--CoA ligase [ADP-forming] subunit alpha	2	2	1	1	2438	1	1873		890	890	890
group_128		hypothetical protein	2	2	1	1	465	1	529		137	170	153
trpS2		Tryptophan--tRNA ligase 2	2	2	1	1	2437	1	1872		1013	1013	1013
yedI		Inner membrane protein YedI	2	2	1	1	2436	1	1871		923	923	923
group_1282		hypothetical protein	2	2	1	1	2435	1	1870		899	899	899
nhaP		Na(+)/H(+) antiporter NhaP	2	2	1	1	2434	1	1869		1502	1502	1502
group_1284		hypothetical protein	2	2	1	1	2432	1	1867		1067	1067	1067
group_1285		hypothetical protein	2	2	1	1	2431	1	1866		833	833	833
rlmJ		Ribosomal RNA large subunit methyltransferase J	2	2	1	1	2430	1	1865		857	857	857
group_1287		hypothetical protein	2	2	1	1	2429	1	1864		605	605	605
group_1288		hypothetical protein	2	2	1	1	2428	1	1863		527	527	527
group_1289		hypothetical protein	2	2	1	1	2427	1	1862		245	245	245
mdh		Malate dehydrogenase	2	2	1	1	2426	1	1861		986	986	986
group_1291		hypothetical protein	2	2	1	1	2425	1	1860		662	662	662
slt		Soluble lytic murein transglycosylase	2	2	1	1	2424	1	1859		1985	1985	1985
miaB		tRNA-2-methylthio-N(6)-dimethylallyladenosine synthase	2	2	1	1	2423	1	1858		1451	1451	1451
ybeZ		PhoH-like protein	2	2	1	1	2422	1	1857		1088	1088	1088
ybeY		Endoribonuclease YbeY	2	2	1	1	2421	1	1856		476	476	476
group_1296		hypothetical protein	2	2	1	1	2420	1	1855		884	884	884
group_1297		hypothetical protein	2	2	1	1	2419	1	1854		671	671	671
group_1298		hypothetical protein	2	2	1	1	2418	1	1853		713	713	713
xpt		Xanthine phosphoribosyltransferase	2	2	1	1	2417	1	1852		575	575	575
group_13		phage tail protein	2	2	1	1	597	1	2655		398	1904	1151
group_1300		NAD(P)H dehydrogenase (quinone)	2	2	1	1	2416	1	1851		593	593	593
group_1301		hypothetical protein	2	2	1	1	2415	1	1850		1247	1247	1247
group_1302		hypothetical protein	2	2	1	1	2414	1	1849		914	914	914
nimR_1		HTH-type transcriptional regulator NimR	2	2	1	1	2413	1	1848		794	794	794
ycgM		putative protein YcgM	2	2	1	1	2412	1	1847		641	641	641
group_1305		hypothetical protein	2	2	1	1	2411	1	1846		497	497	497
group_1306		hypothetical protein	2	2	1	1	2410	1	1845		692	692	692
group_1307		hypothetical protein	2	2	1	1	2409	1	1844		2246	2246	2246
group_1308		hypothetical protein	2	2	1	1	2408	1	1843		593	593	593
rnr		Ribonuclease R	2	2	1	1	2407	1	1842		2432	2432	2432
prlC_1		Oligopeptidase A	2	2	1	1	2406	1	1841		2054	2054	2054
group_1311		hypothetical protein	2	2	1	1	2405	1	1840		209	209	209
group_1312		hypothetical protein	2	2	1	1	2404	1	1839		431	431	431
group_1313		hypothetical protein	2	2	1	1	2403	1	1838		2195	2195	2195
group_1314		hypothetical protein	2	2	1	1	2402	1	1837		566	566	566
group_1315		hypothetical protein	2	2	1	1	2401	1	1836		1085	1085	1085
group_1316		hypothetical protein	2	2	1	1	2400	1	1835		101	101	101
group_1317		hypothetical protein	2	2	1	1	2399	1	1834		290	290	290
group_1318		hypothetical protein	2	2	1	1	2398	1	1833		257	257	257
mmgC_3		Acyl-CoA dehydrogenase	2	2	1	1	2397	1	1832		1172	1172	1172
mymA		Putative FAD-containing monooxygenase MymA	2	2	1	1	2396	1	1831		1490	1490	1490
rplQ		50S ribosomal protein L17	2	2	1	1	2395	1	1830		377	377	377
rpoA		DNA-directed RNA polymerase subunit alpha	2	2	1	1	2394	1	1829		1007	1007	1007
rpsD		30S ribosomal protein S4	2	2	1	1	2393	1	1828		626	626	626
rpsK		30S ribosomal protein S11	2	2	1	1	2392	1	1827		386	386	386
rpsM		30S ribosomal protein S13	2	2	1	1	2391	1	1826		356	356	356
rpmJ		50S ribosomal protein L36	2	2	1	1	2390	1	1825		116	116	116
secY		Protein translocase subunit SecY	2	2	1	1	2389	1	1824		1352	1352	1352
rplO		50S ribosomal protein L15	2	2	1	1	2388	1	1823		440	440	440
rpmD		50S ribosomal protein L30	2	2	1	1	2387	1	1822		176	176	176
rpsE		30S ribosomal protein S5	2	2	1	1	2386	1	1821		497	497	497
rplR		50S ribosomal protein L18	2	2	1	1	2385	1	1820		350	350	350
rplF		50S ribosomal protein L6	2	2	1	1	2384	1	1819		533	533	533
rpsH		30S ribosomal protein S8	2	2	1	1	2383	1	1818		395	395	395
rpsN		30S ribosomal protein S14	2	2	1	1	2382	1	1817		305	305	305
rplE		50S ribosomal protein L5	2	2	1	1	2381	1	1816		536	536	536
rplX		50S ribosomal protein L24	2	2	1	1	2380	1	1815		317	317	317
rplN		50S ribosomal protein L14	2	2	1	1	2379	1	1814		368	368	368
rpsQ		30S ribosomal protein S17	2	2	1	1	2378	1	1813		257	257	257
rpmC		50S ribosomal protein L29	2	2	1	1	2377	1	1812		197	197	197
rplP		50S ribosomal protein L16	2	2	1	1	2376	1	1811		413	413	413
rpsC		30S ribosomal protein S3	2	2	1	1	2375	1	1810		752	752	752
rplV		50S ribosomal protein L22	2	2	1	1	2374	1	1809		329	329	329
rpsS		30S ribosomal protein S19	2	2	1	1	2373	1	1808		275	275	275
rplB		50S ribosomal protein L2	2	2	1	1	2372	1	1807		824	824	824
rplW		50S ribosomal protein L23	2	2	1	1	2371	1	1806		320	320	320
rplD		50S ribosomal protein L4	2	2	1	1	2370	1	1805		602	602	602
rplC		50S ribosomal protein L3	2	2	1	1	2369	1	1804		638	638	638
rpsJ		30S ribosomal protein S10	2	2	1	1	2368	1	1803		311	311	311
group_1349		hypothetical protein	2	2	1	1	2367	1	1802		728	728	728
metC		Cystathionine beta-lyase	2	2	1	1	2366	1	1801		1190	1190	1190
group_1351		hypothetical protein	2	2	1	1	2365	1	1800		1547	1547	1547
hmp		Flavohemoprotein	2	2	1	1	2364	1	1799		764	764	764
nsrR		HTH-type transcriptional repressor NsrR	2	2	1	1	2363	1	1798		437	437	437
engB		GTP-binding protein EngB	2	2	1	1	2362	1	1797		776	776	776
group_1355		hypothetical protein	2	2	1	1	2361	1	1796		947	947	947
gltP_1		Proton/glutamate-aspartate symporter	2	2	1	1	2360	1	1795		1319	1319	1319
tesB		Acyl-CoA thioesterase 2	2	2	1	1	2359	1	1794		872	872	872
plsB		Glycerol-3-phosphate acyltransferase	2	2	1	1	2358	1	1793		2570	2570	2570
group_1359		hypothetical protein	2	2	1	1	2357	1	1792		986	986	986
group_136		hypothetical protein	2	2	1	1	593	1	2659		389	389	389
group_1360		hypothetical protein	2	2	1	1	2356	1	1791		815	815	815
recG		ATP-dependent DNA helicase RecG	2	2	1	1	2355	1	1790		2045	2045	2045
group_1362		hypothetical protein	2	2	1	1	2354	1	1789		635	635	635
group_1363		hypothetical protein	2	2	1	1	2353	1	1788		401	401	401
group_1364		Putative cytokinin riboside 5'-monophosphate phosphoribohydrolase	2	2	1	1	2352	1	1787		581	581	581
corA		Magnesium transport protein CorA	2	2	1	1	2351	1	1786		1013	1013	1013
group_1366		hypothetical protein	2	2	1	1	2350	1	1785		287	287	287
mlaC		Intermembrane phospholipid transport system binding protein MlaC	2	2	1	1	2349	1	1784		641	641	641
mlaD		Intermembrane phospholipid transport system binding protein MlaD	2	2	1	1	2348	1	1783		680	680	680
mlaE		Intermembrane phospholipid transport system permease protein MlaE	2	2	1	1	2347	1	1782		776	776	776
mlaF		Intermembrane phospholipid transport system ATP-binding protein MlaF	2	2	1	1	2346	1	1781		818	818	818
deaD		ATP-dependent RNA helicase DeaD	2	2	1	1	2345	1	1780		1847	1847	1847
suhB		Inositol-1-monophosphatase	2	2	1	1	2344	1	1779		881	881	881
dxs		1-deoxy-D-xylulose-5-phosphate synthase	2	2	1	1	2343	1	1778		1904	1904	1904
ribA		GTP cyclohydrolase-2	2	2	1	1	2342	1	1777		602	602	602
hemF		Oxygen-dependent coproporphyrinogen-III oxidase	2	2	1	1	2341	1	1776		950	950	950
aroE		Shikimate dehydrogenase (NADP(+))	2	2	1	1	2340	1	1775		788	788	788
group_1377		hypothetical protein	2	2	1	1	2339	1	1774		2303	2303	2303
dmdC_4		3-methylmercaptopropionyl-CoA dehydrogenase	2	2	1	1	2338	1	1773		1823	1823	1823
group_1379		hypothetical protein	2	2	1	1	2337	1	1772		656	656	656
group_138		major capsid protein	2	2	1	1	591	1	2662		953	953	953
group_1380		hypothetical protein	2	2	1	1	2336	1	1771		254	254	254
group_1381		hypothetical protein	2	2	1	1	2335	1	1770		1100	1100	1100
group_1382		hypothetical protein	2	2	1	1	2334	1	1769		797	797	797
group_1383		hypothetical protein	2	2	1	1	2333	1	1768		1262	1262	1262
group_1384		hypothetical protein	2	2	1	1	2332	1	1767		416	416	416
group_1385		hypothetical protein	2	2	1	1	2331	1	1766		422	422	422
glyQ		Glycine--tRNA ligase alpha subunit	2	2	1	1	2330	1	1765		977	977	977
glyS		Glycine--tRNA ligase beta subunit	2	2	1	1	2329	1	1764		2069	2069	2069
group_1388		ATP/GTP phosphatase	2	2	1	1	2328	1	1763		1109	1109	1109
group_1389		hypothetical protein	2	2	1	1	2327	1	1762		701	701	701
group_1390		hypothetical protein	2	2	1	1	2326	1	1761		284	284	284
group_1391		hypothetical protein	2	2	1	1	2325	1	1760		746	746	746
gltR_2		HTH-type transcriptional regulator GltR	2	2	1	1	2324	1	1759		866	866	866
group_1393		hypothetical protein	2	2	1	1	2323	1	1758		419	419	419
group_1394		hypothetical protein	2	2	1	1	2322	1	1757		431	431	431
group_1395		hypothetical protein	2	2	1	1	2321	1	1756		1355	1355	1355
group_1396		hypothetical protein	2	2	1	1	2320	1	1755		311	311	311
group_1397		hypothetical protein	2	2	1	1	2319	1	1754		761	761	761
astE		Succinylglutamate desuccinylase	2	2	1	1	2318	1	1753		974	974	974
astB		N-succinylarginine dihydrolase	2	2	1	1	2317	1	1752		1343	1343	1343
astD		N-succinylglutamate 5-semialdehyde dehydrogenase	2	2	1	1	2316	1	1751		1469	1469	1469
astA_1		Arginine N-succinyltransferase	2	2	1	1	2315	1	1750		1031	1031	1031
astC_1		Succinylornithine transaminase	2	2	1	1	2314	1	1749		1214	1214	1214
gdhA_1		Glutamate dehydrogenase	2	2	1	1	2313	1	1748		1271	1271	1271
rocC_1		Amino-acid permease RocC	2	2	1	1	2312	1	1747		1433	1433	1433
group_1405		hypothetical protein	2	2	1	1	2311	1	1746		1277	1277	1277
COQ5_1		2-methoxy-6-polyprenyl-1,4-benzoquinol methylase, mitochondrial	2	2	1	1	2310	1	1745		794	794	794
group_1407		hypothetical protein	2	2	1	1	2309	1	1744		533	533	533
group_1408		hypothetical protein	2	2	1	1	2308	1	1743		563	563	563
group_1409		hypothetical protein	2	2	1	1	2307	1	1742		467	467	467
group_1410		ParA-like protein	2	2	1	1	2306	1	1741		596	596	596
ydiK		Putative transport protein YdiK	2	2	1	1	2305	1	1740		1118	1118	1118
group_1412		hypothetical protein	2	2	1	1	2304	1	1739		575	575	575
yccS_2		Inner membrane protein YccS	2	2	1	1	2303	1	1738		2150	2150	2150
craA		Chloramphenicol resistance protein CraA	2	2	1	1	2302	1	1737		1229	1229	1229
group_1415		hypothetical protein	2	2	1	1	2301	1	1736		365	365	365
mdaB		NADPH:quinone oxidoreductase MdaB	2	2	1	1	2300	1	1735		587	587	587
ygiN		putative quinol monooxygenase YgiN	2	2	1	1	2299	1	1734		314	314	314
group_1418		hypothetical protein	2	2	1	1	2298	1	1733		368	368	368
group_1419		putative FAD-linked oxidoreductase	2	2	1	1	2297	1	1732		1409	1409	1409
serA		D-3-phosphoglycerate dehydrogenase	2	2	1	1	2296	1	1731		1232	1232	1232
rhtA_2		Threonine/homoserine exporter RhtA	2	2	1	1	2295	1	1730		884	884	884
rhtA_3		Threonine/homoserine exporter RhtA	2	2	1	1	2294	1	1729		860	860	860
group_1423		hypothetical protein	2	2	1	1	2293	1	1728		443	443	443
yfcA		putative membrane transporter protein YfcA	2	2	1	1	2292	1	1727		776	776	776
truB		tRNA pseudouridine synthase B	2	2	1	1	2291	1	1726		905	905	905
lifO		Lipase chaperone	2	2	1	1	2290	1	1725		965	965	965
lip		Triacylglycerol lipase	2	2	1	1	2289	1	1724		974	974	974
rplS		50S ribosomal protein L19	2	2	1	1	2288	1	1723		368	368	368
trmD		tRNA (guanine-N(1)-)-methyltransferase	2	2	1	1	2287	1	1722		740	740	740
rimM		Ribosome maturation factor RimM	2	2	1	1	2286	1	1721		548	548	548
rpsP		30S ribosomal protein S16	2	2	1	1	2285	1	1720		251	251	251
group_1432		hypothetical protein	2	2	1	1	2284	1	1719		425	425	425
group_1433		hypothetical protein	2	2	1	1	2283	1	1718		482	482	482
group_1434		hypothetical protein	2	2	1	1	2282	1	1717		3866	3866	3866
group_1435		hypothetical protein	2	2	1	1	2281	1	1716		818	818	818
group_1436		hypothetical protein	2	2	1	1	2280	1	1715		1001	1001	1001
group_1437		hypothetical protein	2	2	1	1	2279	1	1714		554	554	554
group_1438		hypothetical protein	2	2	1	1	2278	1	1713		473	473	473
ispH		4-hydroxy-3-methylbut-2-enyl diphosphate reductase	2	2	1	1	2277	1	1712		950	950	950
group_1440		guanylate kinase	2	2	1	1	2276	1	1711		629	629	629
rpoZ		DNA-directed RNA polymerase subunit omega	2	2	1	1	2275	1	1710		278	278	278
spoT		Bifunctional (p)ppGpp synthase/hydrolase SpoT	2	2	1	1	2274	1	1709		2105	2105	2105
yabJ		2-iminobutanoate/2-iminopropanoate deaminase	2	2	1	1	2273	1	1708		383	383	383
bfd		Bacterioferritin-associated ferredoxin	2	2	1	1	2272	1	1707		194	194	194
bfr_1		Bacterioferritin	2	2	1	1	2271	1	1706		464	464	464
group_1446		hypothetical protein	2	2	1	1	2270	1	1705		1628	1628	1628
pilA		Fimbrial protein	2	2	1	1	2269	1	1704		485	485	485
group_1448		hypothetical protein	2	2	1	1	2268	1	1703		560	560	560
group_1449		hypothetical protein	2	2	1	1	2267	1	1702		1082	1082	1082
lemA		Protein LemA	2	2	1	1	2266	1	1701		590	590	590
group_1451		hypothetical protein	2	2	1	1	2265	1	1700		887	887	887
gltD		Glutamate synthase [NADPH] small chain	2	2	1	1	2264	1	1699		1421	1421	1421
gltB		Glutamate synthase [NADPH] large chain	2	2	1	1	2263	1	1698		4481	4481	4481
group_1454		hypothetical protein	2	2	1	1	2262	1	1697		875	875	875
aroB		3-dehydroquinate synthase	2	2	1	1	2261	1	1696		1082	1082	1082
aroK		Shikimate kinase 1	2	2	1	1	2260	1	1695		569	569	569
pilQ		Type IV pilus biogenesis and competence protein PilQ	2	2	1	1	2259	1	1694		2165	2165	2165
group_1458		hypothetical protein	2	2	1	1	2258	1	1693		527	527	527
group_1459		hypothetical protein	2	2	1	1	2257	1	1692		740	740	740
group_146		hypothetical protein	2	2	1	1	3076	1	3884		2429	2486	2457	P1033_00105	P245_00003
group_1460		hypothetical protein	2	2	1	1	2256	1	1691		641	641	641
ftsA_1		Cell division protein FtsA	2	2	1	1	2255	1	1690		1058	1058	1058
mrcA		Penicillin-binding protein 1A	2	2	1	1	2254	1	1689		2555	2555	2555
rlmA		23S rRNA (guanine(745)-N(1))-methyltransferase	2	2	1	1	2253	1	1688		824	824	824
group_1464		hypothetical protein	2	2	1	1	2252	1	1687		332	332	332
mraY		Phospho-N-acetylmuramoyl-pentapeptide-transferase	2	2	1	1	2251	1	1686		1118	1118	1118
murF		UDP-N-acetylmuramoyl-tripeptide--D-alanyl-D-alanine ligase	2	2	1	1	2250	1	1685		1400	1400	1400
murE		UDP-N-acetylmuramoyl-L-alanyl-D-glutamate--2,6-diaminopimelate ligase	2	2	1	1	2249	1	1684		1499	1499	1499
ftsI		Peptidoglycan D,D-transpeptidase FtsI	2	2	1	1	2248	1	1683		1832	1832	1832
ftsL		Cell division protein FtsL	2	2	1	1	2247	1	1682		332	332	332
group_147		hypothetical protein	2	2	1	1	3074	1	3886		269	911	590	P1033_00107	P245_00001
rsmH		Ribosomal RNA small subunit methyltransferase H	2	2	1	1	2246	1	1681		923	923	923
sbp_1		Sulfate-binding protein	2	2	1	1	2245	1	1680		1001	1001	1001
group_1472		hypothetical protein	2	2	1	1	2244	1	1679		299	299	299
gltX		Glutamate--tRNA ligase	2	2	1	1	2243	1	1678		1508	1508	1508
rocC_2		Amino-acid permease RocC	2	2	1	1	2242	1	1677		1418	1418	1418
group_1475		hypothetical protein	2	2	1	1	2241	1	1676		884	884	884
group_1476		hypothetical protein	2	2	1	1	2240	1	1675		947	947	947
group_1477		hypothetical protein	2	2	1	1	2239	1	1674		338	338	338
czcD_1		Metal cation efflux system protein CzcD	2	2	1	1	2238	1	1673		956	956	956
czcA_1		Cobalt-zinc-cadmium resistance protein CzcA	2	2	1	1	2237	1	1672		3158	3158	3158
czcB		Cobalt-zinc-cadmium resistance protein CzcB	2	2	1	1	2236	1	1671		1208	1208	1208
group_1481		hypothetical protein	2	2	1	1	2235	1	1670		1409	1409	1409
group_1482		hypothetical protein	2	2	1	1	2234	1	1669		371	371	371
group_1483		hypothetical protein	2	2	1	1	2233	1	1668		611	611	611
group_1484		hypothetical protein	2	2	1	1	2232	1	1667		194	194	194
group_1485		hypothetical protein	2	2	1	1	2231	1	1666		377	377	377
group_1486		hypothetical protein	2	2	1	1	2230	1	1665		692	692	692
group_1487		hypothetical protein	2	2	1	1	2229	1	1664		380	380	380
ettA		Energy-dependent translational throttle protein EttA	2	2	1	1	2228	1	1663		1661	1661	1661
group_1489		O-acetyl-L-homoserine sulfhydrylase	2	2	1	1	2227	1	1662		1277	1277	1277
group_149		hypothetical protein	2	2	1	1	2702	1	4073		368	368	368
acr1		Fatty acyl-CoA reductase	2	2	1	1	2226	1	1661		890	890	890
group_1491		hypothetical protein	2	2	1	1	2225	1	1660		2189	2189	2189
yhgF		Protein YhgF	2	2	1	1	2224	1	1659		2348	2348	2348
ompR		Transcriptional regulatory protein OmpR	2	2	1	1	2223	1	1658		764	764	764
envZ		Osmolarity sensor protein EnvZ	2	2	1	1	2222	1	1657		1457	1457	1457
cat1		Succinyl-CoA:coenzyme A transferase	2	2	1	1	2221	1	1656		1514	1514	1514
ypeA		Acetyltransferase YpeA	2	2	1	1	2220	1	1655		431	431	431
panZ		PanD regulatory factor	2	2	1	1	2219	1	1654		383	383	383
hisB		Histidine biosynthesis bifunctional protein HisB	2	2	1	1	2218	1	1653		593	593	593
hisH		Imidazole glycerol phosphate synthase subunit HisH	2	2	1	1	2217	1	1652		617	617	617
group_15		phage tail fiber host specificity protein	2	2	1	1	2717	1	455		3644	3935	3789
group_1500		hypothetical protein	2	2	1	1	2216	1	1651		548	548	548
rnd_1		Ribonuclease D	2	2	1	1	2215	1	1650		641	641	641
hisA		1-(5-phosphoribosyl)-5-[(5-phosphoribosylamino)methylideneamino] imidazole-4-carboxamide isomerase	2	2	1	1	2214	1	1649		731	731	731
msbA_1		Lipid A export ATP-binding/permease protein MsbA	2	2	1	1	2213	1	1648		1691	1691	1691
sutR_1		HTH-type transcriptional regulator SutR	2	2	1	1	2212	1	1647		551	551	551
group_1505		hypothetical protein	2	2	1	1	2211	1	1646		902	902	902
group_1506		hypothetical protein	2	2	1	1	2210	1	1645		311	311	311
group_1507		hypothetical protein	2	2	1	1	2209	1	1644		392	392	392
group_1508		hypothetical protein	2	2	1	1	2208	1	1643		629	629	629
thrB		Homoserine kinase	2	2	1	1	2207	1	1642		950	950	950
hisF		Imidazole glycerol phosphate synthase subunit HisF	2	2	1	1	2206	1	1641		758	758	758
group_1511		hypothetical protein	2	2	1	1	2205	1	1640		638	638	638
virS		HTH-type transcriptional regulator VirS	2	2	1	1	2204	1	1639		1004	1004	1004
aqpZ2		Aquaporin Z 2	2	2	1	1	2203	1	1638		689	689	689
group_1514		hypothetical protein	2	2	1	1	2202	1	1637		242	242	242
rhtB_2		Homoserine/homoserine lactone efflux protein	2	2	1	1	2201	1	1636		599	599	599
group_1516		hypothetical protein	2	2	1	1	2200	1	1635		1103	1103	1103
group_1517		hypothetical protein	2	2	1	1	2199	1	1634		443	443	443
kup		Low affinity potassium transport system protein kup	2	2	1	1	2198	1	1633		1877	1877	1877
group_1519		hypothetical protein	2	2	1	1	2197	1	1632		341	341	341
group_1520		hypothetical protein	2	2	1	1	2196	1	1631		458	458	458
group_1521		hypothetical protein	2	2	1	1	2195	1	1630		467	467	467
secE		Protein translocase subunit SecE	2	2	1	1	2193	1	1628		440	440	440
nusG		NusG antitermination factor	2	2	1	1	2192	1	1627		533	533	533
rplK		50S ribosomal protein L11	2	2	1	1	2191	1	1626		428	428	428
rplA		50S ribosomal protein L1	2	2	1	1	2190	1	1625		695	695	695
rplJ		50S ribosomal protein L10	2	2	1	1	2189	1	1624		506	506	506
rplL		50S ribosomal protein L7/L12	2	2	1	1	2188	1	1623		371	371	371
rpoB		DNA-directed RNA polymerase subunit beta	2	2	1	1	2187	1	1622		4088	4088	4088
rpoC		DNA-directed RNA polymerase subunit beta'	2	2	1	1	2186	1	1621		4172	4172	4172
group_1530		hypothetical protein	2	2	1	1	2185	1	1620		365	365	365
group_1531		hypothetical protein	2	2	1	1	2184	1	1619		356	356	356
group_1532		hypothetical protein	2	2	1	1	2183	1	1618		497	497	497
ephD		putative oxidoreductase EphD	2	2	1	1	2182	1	1617		872	872	872
group_1534		hypothetical protein	2	2	1	1	2181	1	1616		1424	1424	1424
ompW		Outer membrane protein W	2	2	1	1	2180	1	1615		581	581	581
group_1536		hypothetical protein	2	2	1	1	2179	1	1614		356	356	356
htpG		Chaperone protein HtpG	2	2	1	1	2178	1	1613		1919	1919	1919
group_1538		hypothetical protein	2	2	1	1	2177	1	1612		923	923	923
group_1539		hypothetical protein	2	2	1	1	2176	1	1611		1139	1139	1139
group_1540		hypothetical protein	2	2	1	1	2175	1	1610		704	704	704
group_1541		hypothetical protein	2	2	1	1	2174	1	1609		758	758	758
hmrR_1		HTH-type transcriptional regulator HmrR	2	2	1	1	2173	1	1608		365	365	365
ydeN		Putative hydrolase YdeN	2	2	1	1	2172	1	1607		557	557	557
group_1544		hypothetical protein	2	2	1	1	2171	1	1606		716	716	716
group_1545		hypothetical protein	2	2	1	1	2170	1	1605		491	491	491
fadA_2		3-ketoacyl-CoA thiolase	2	2	1	1	2169	1	1604		1172	1172	1172
fadB		Fatty acid oxidation complex subunit alpha	2	2	1	1	2168	1	1603		2153	2153	2153
group_1548		hypothetical protein	2	2	1	1	2167	1	1602		914	914	914
group_1549		hypothetical protein	2	2	1	1	2166	1	1601		1043	1043	1043
group_155		hypothetical protein	2	2	1	1	4113	1	1206		455	455	455
group_1550		hypothetical protein	2	2	1	1	2165	1	1600		530	530	530
uvrC		UvrABC system protein C	2	2	1	1	2164	1	1599		1808	1808	1808
group_1552		hypothetical protein	2	2	1	1	2163	1	1598		794	794	794
pgsA		CDP-diacylglycerol--glycerol-3-phosphate 3-phosphatidyltransferase	2	2	1	1	2162	1	1597		587	587	587
ada		Bifunctional transcriptional activator/DNA repair enzyme Ada	2	2	1	1	2161	1	1596		854	854	854
group_1555		hypothetical protein	2	2	1	1	2160	1	1595		611	611	611
group_1556		hypothetical protein	2	2	1	1	2159	1	1594		773	773	773
aaeB		p-hydroxybenzoic acid efflux pump subunit AaeB	2	2	1	1	2158	1	1593		2099	2099	2099
group_1558		hypothetical protein	2	2	1	1	2157	1	1592		206	206	206
aaeA		p-hydroxybenzoic acid efflux pump subunit AaeA	2	2	1	1	2156	1	1591		1001	1001	1001
yqgF		Putative pre-16S rRNA nuclease	2	2	1	1	2155	1	1590		440	440	440
group_1561		hypothetical protein	2	2	1	1	2154	1	1589		554	554	554
recN		DNA repair protein RecN	2	2	1	1	2153	1	1588		1667	1667	1667
group_1563		hypothetical protein	2	2	1	1	2152	1	1587		1310	1310	1310
ppnP		Pyrimidine/purine nucleoside phosphorylase	2	2	1	1	2151	1	1586		326	326	326
rlmB_1		23S rRNA (guanosine-2'-O-)-methyltransferase RlmB	2	2	1	1	2150	1	1585		749	749	749
group_1566		hypothetical protein	2	2	1	1	2149	1	1584		914	914	914
coaE		Dephospho-CoA kinase	2	2	1	1	2148	1	1583		596	596	596
outO		Type 4 prepilin-like proteins leader peptide-processing enzyme	2	2	1	1	2147	1	1582		860	860	860
epsF_1		Type II secretion system protein F	2	2	1	1	2146	1	1581		1226	1226	1226
group_157		gp58	2	2	1	1	4337	1	1430		593	905	749
group_1570		hypothetical protein	2	2	1	1	1004	1	1580		1712	1712	1712
tpiA		Triosephosphate isomerase	2	2	1	1	1005	1	1579		794	794	794
secG		Protein-export membrane protein SecG	2	2	1	1	1006	1	1578		329	329	329
rimP		Ribosome maturation factor RimP	2	2	1	1	1007	1	1577		524	524	524
nusA		Transcription termination/antitermination protein NusA	2	2	1	1	1008	1	1576		1484	1484	1484
infB		Translation initiation factor IF-2	2	2	1	1	1009	1	1575		2699	2699	2699
rbfA		30S ribosome-binding factor	2	2	1	1	1010	1	1574		401	401	401
mrpG		Na(+)/H(+) antiporter subunit G	2	2	1	1	1011	1	1573		404	404	404
mrpF		Na(+)/H(+) antiporter subunit F	2	2	1	1	1012	1	1572		275	275	275
mnhE1		Na(+)/H(+) antiporter subunit E1	2	2	1	1	1013	1	1571		527	527	527
group_158		hypothetical protein	2	2	1	1	58	1	3967		269	425	347
mrpD		Na(+)/H(+) antiporter subunit D	2	2	1	1	1014	1	1570		1811	1811	1811
mnhC1		Na(+)/H(+) antiporter subunit C1	2	2	1	1	1015	1	1569		368	368	368
ndhB		NAD(P)H-quinone oxidoreductase subunit 2, chloroplastic	2	2	1	1	1016	1	1568		2837	2837	2837
group_1583		hypothetical protein	2	2	1	1	1017	1	1567		1382	1382	1382
group_1584		putative DNA/RNA helicase	2	2	1	1	1018	1	1566		1502	1502	1502
hisI		Histidine biosynthesis bifunctional protein HisIE	2	2	1	1	1019	1	1565		767	767	767
group_1586		hypothetical protein	2	2	1	1	1020	1	1564		266	266	266
group_1587		Virulence protein	2	2	1	1	1021	1	1563		386	386	386
group_1588		putative protein	2	2	1	1	1022	1	1562		1313	1313	1313
ubiB_1		putative protein kinase UbiB	2	2	1	1	1023	1	1561		1619	1619	1619
group_159		hypothetical protein	2	2	1	1	875	1	2980		344	356	350
ubiJ		Ubiquinone biosynthesis accessory factor UbiJ	2	2	1	1	1024	1	1560		668	668	668
COQ5_2		2-methoxy-6-polyprenyl-1,4-benzoquinol methylase, mitochondrial	2	2	1	1	1025	1	1559		947	947	947
group_1592		hypothetical protein	2	2	1	1	1026	1	1558		707	707	707
pap		Polyphosphate:AMP phosphotransferase	2	2	1	1	1027	1	1557		1418	1418	1418
group_1594		hypothetical protein	2	2	1	1	1028	1	1556		506	506	506
recC		RecBCD enzyme subunit RecC	2	2	1	1	1029	1	1555		3635	3635	3635
recB		RecBCD enzyme subunit RecB	2	2	1	1	1030	1	1554		3698	3698	3698
group_1597		exodeoxyribonuclease V, alpha subunit	2	2	1	1	1031	1	1553		1763	1763	1763
amiE		N-acetylmuramyl-L-alanine amidase	2	2	1	1	1032	1	1552		1298	1298	1298
rpsO		30S ribosomal protein S15	2	2	1	1	1033	1	1551		269	269	269
ORF023_1		PcrA helicase	2	2	1	1	1113	1	2425		1979	2066	2022
pnp		Polyribonucleotide nucleotidyltransferase	2	2	1	1	1034	1	1550		2093	2093	2093
group_1601		hypothetical protein	2	2	1	1	1035	1	1549		1211	1211	1211
cbpM		Chaperone modulatory protein CbpM	2	2	1	1	1036	1	1548		329	329	329
cbpA		Curved DNA-binding protein	2	2	1	1	1037	1	1547		956	956	956
leuE_1		Leucine efflux protein	2	2	1	1	1038	1	1546		611	611	611
hslO		33 kDa chaperonin	2	2	1	1	1039	1	1545		875	875	875
kefC		Glutathione-regulated potassium-efflux system protein KefC	2	2	1	1	1040	1	1544		1841	1841	1841
priA		Primosomal protein N'	2	2	1	1	1041	1	1543		2228	2228	2228
group_1608	epsF_2	Type II secretion system protein F	2	2	1	1	1042	1	1542		1205	1205	1205
group_1609		hypothetical protein	2	2	1	1	1043	1	1541		581	581	581
group_161		hypothetical protein	2	2	1	1	1143	1	2455		542	587	564
group_1610		hypothetical protein	2	2	1	1	1044	1	1540		344	344	344
csaA		putative chaperone CsaA	2	2	1	1	1045	1	1539		338	338	338
lnt		Apolipoprotein N-acyltransferase	2	2	1	1	1046	1	1538		1559	1559	1559
corC		Magnesium and cobalt efflux protein CorC	2	2	1	1	1047	1	1537		839	839	839
tusA_2		Sulfur carrier protein TusA	2	2	1	1	1048	1	1536		257	257	257
group_1615		hypothetical protein	2	2	1	1	1049	1	1535		380	380	380
group_1616		Electron transfer flavoprotein-ubiquinone oxidoreductase	2	2	1	1	1050	1	1534		1712	1712	1712
group_1617		hypothetical protein	2	2	1	1	1051	1	1533		611	611	611
murI		Glutamate racemase	2	2	1	1	1052	1	1532		866	866	866
group_1619		hypothetical protein	2	2	1	1	1053	1	1531		1004	1004	1004
group_162		hypothetical protein	2	2	1	1	3454	1	783		344	344	344
hemH		Ferrochelatase	2	2	1	1	1054	1	1530		1016	1016	1016
gloC		Hydroxyacylglutathione hydrolase GloC	2	2	1	1	1055	1	1529		644	644	644
yacG		DNA gyrase inhibitor YacG	2	2	1	1	1056	1	1528		194	194	194
trmB_1		tRNA (guanine-N(7)-)-methyltransferase	2	2	1	1	1057	1	1527		632	632	632
baiN		3-dehydro-bile acid delta(4,6)-reductase	2	2	1	1	1058	1	1526		1205	1205	1205
group_1625		hypothetical protein	2	2	1	1	1059	1	1525		410	410	410
crcB		Putative fluoride ion transporter CrcB	2	2	1	1	1060	1	1524		380	380	380
group_1627		hypothetical protein	2	2	1	1	1061	1	1523		332	332	332
rpmE2		50S ribosomal protein L31 type B	2	2	1	1	1062	1	1522		254	254	254
ubiB_2		protein kinase UbiB	2	2	1	1	1063	1	1521		1298	1298	1298
group_163		hypothetical protein	2	2	1	1	3472	1	767		365	365	365
group_1630	sfnC_3	putative FMNH2-dependent monooxygenase SfnC	2	2	1	1	1064	1	1520		1247	1247	1247
sfnC_3		putative FMNH2-dependent monooxygenase SfnC	2	2	1	1	1065	1	1519		1250	1250	1250
norM_1		Multidrug resistance protein NorM	2	2	1	1	1066	1	1518		1346	1346	1346
group_1633		hypothetical protein	2	2	1	1	1067	1	1517		461	461	461
hemW		Heme chaperone HemW	2	2	1	1	1068	1	1516		1154	1154	1154
fabG_2		3-oxoacyl-[acyl-carrier-protein] reductase FabG	2	2	1	1	1069	1	2381		755	755	755
pgrR_2		HTH-type transcriptional regulator PgrR	2	2	1	1	1070	1	2382		896	896	896
group_1637		Long-chain-fatty-acid--CoA ligase FadD17	2	2	1	1	1071	1	2383		1841	1841	1841
rne		Ribonuclease E	2	2	1	1	1072	1	2384		3332	3332	3332
rluC		Ribosomal large subunit pseudouridine synthase C	2	2	1	1	1073	1	2385		932	932	932
group_164		hypothetical protein	2	2	1	1	3463	1	776		353	353	353
group_1640		5'-nucleotidase	2	2	1	1	1074	1	2386		674	674	674
group_1641		hypothetical protein	2	2	1	1	1075	1	2387		695	695	695
group_1642		hypothetical protein	2	2	1	1	1076	1	2388		605	605	605
group_1643		hypothetical protein	2	2	1	1	1077	1	2389		677	677	677
hcaR_1		Hca operon transcriptional activator HcaR	2	2	1	1	1078	1	2390		899	899	899
group_1645		putative protein	2	2	1	1	1079	1	2391		1052	1052	1052
katG		Catalase-peroxidase	2	2	1	1	1080	1	2392		2156	2156	2156
ptsP		Phosphoenolpyruvate-dependent phosphotransferase system	2	2	1	1	1081	1	2393		2294	2294	2294
rppH		RNA pyrophosphohydrolase	2	2	1	1	1082	1	2394		485	485	485
group_1649		putative phosphatase	2	2	1	1	1083	1	2395		650	650	650
group_165		hypothetical protein	2	2	1	1	4010	1	2776		362	362	362
cmpR_2		HTH-type transcriptional activator CmpR	2	2	1	1	1084	1	2396		860	860	860
group_1651		hypothetical protein	2	2	1	1	1085	1	2397		254	254	254
leuC		3-isopropylmalate dehydratase large subunit	2	2	1	1	1086	1	2398		1529	1529	1529
leuD		3-isopropylmalate dehydratase small subunit	2	2	1	1	1087	1	2399		647	647	647
group_1654		hypothetical protein	2	2	1	1	1088	1	2400		590	590	590
leuB		3-isopropylmalate dehydrogenase	2	2	1	1	1089	1	2401		1079	1079	1079
group_1656		hypothetical protein	2	2	1	1	1090	1	2402		407	407	407
group_1657		hypothetical protein	2	2	1	1	1091	1	2403		368	368	368
infA		Translation initiation factor IF-1	2	2	1	1	1092	1	2404		221	221	221
group_1659		putative HTH-type transcriptional regulator	2	2	1	1	1093	1	2405		1010	1010	1010
group_166		hypothetical protein	2	2	1	1	3475	1	765		467	467	467
truA		tRNA pseudouridine synthase A	2	2	1	1	1094	1	2406		797	797	797
ansA		L-asparaginase 1	2	2	1	1	1095	1	2407		947	947	947
group_1662		hypothetical protein	2	2	1	1	1096	1	2408		1262	1262	1262
group_1663		hypothetical protein	2	2	1	1	1097	1	2409		1364	1364	1364
asd		Aspartate-semialdehyde dehydrogenase	2	2	1	1	1098	1	2410		1118	1118	1118
group_1665		hypothetical protein	2	2	1	1	1099	1	2411		1121	1121	1121
gltP_2		Proton/glutamate-aspartate symporter	2	2	1	1	1100	1	2412		1286	1286	1286
mshA_1		D-inositol-3-phosphate glycosyltransferase	2	2	1	1	1101	1	2413		1100	1100	1100
lpxL_1		Lipid A biosynthesis lauroyltransferase	2	2	1	1	1102	1	2414		935	935	935
group_1669	leuE_1	Leucine efflux protein	2	2	1	1	1103	1	2415		632	632	632
group_167		hypothetical protein	2	2	1	1	3999	1	2765		467	467	467
group_1670		hypothetical protein	2	2	1	1	1104	1	2416		1007	1007	1007
uup		ABC transporter ATP-binding protein uup	2	2	1	1	1105	1	2417		1910	1910	1910
slyX		Protein SlyX	2	2	1	1	1106	1	2418		245	245	245
group_1673		Zinc-type alcohol dehydrogenase-like protein	2	2	1	1	1107	1	2419		1010	1010	1010
group_1674		hypothetical protein	2	2	1	1	1108	1	2420		377	377	377
group_1675		hypothetical protein	2	2	1	1	1109	1	2421		449	449	449
topA_1		DNA topoisomerase 1	2	2	1	1	1110	1	2422		2636	2636	2636
group_1677		hypothetical protein	2	2	1	1	1111	1	2423		758	758	758
group_1678		hypothetical protein	2	2	1	1	1112	1	2424		572	572	572
group_1679		hypothetical protein	2	2	1	1	1114	1	2426		239	239	239
group_168		Alpha-ketoglutaric semialdehyde dehydrogenase	2	2	1	1	2076	1	2346		1574	1574	1574
group_1680		hypothetical protein	2	2	1	1	1115	1	2427		167	167	167
group_1681		hypothetical protein	2	2	1	1	1116	1	2428		503	503	503
group_1682		hypothetical protein	2	2	1	1	1117	1	2429		278	278	278
ybaL		Putative cation/proton antiporter YbaL	2	2	1	1	1118	1	2430		1709	1709	1709
rpmG		50S ribosomal protein L33	2	2	1	1	1119	1	2431		155	155	155
rpmB		50S ribosomal protein L28	2	2	1	1	1120	1	2432		236	236	236
calB_1		Coniferyl aldehyde dehydrogenase	2	2	1	1	1121	1	2433		1448	1448	1448
group_1687		hypothetical protein	2	2	1	1	1122	1	2434		692	692	692
purU		Formyltetrahydrofolate deformylase	2	2	1	1	1123	1	2435		863	863	863
group_1689		hypothetical protein	2	2	1	1	1124	1	2436		755	755	755
group_169		Alpha-ketoglutaric semialdehyde dehydrogenase	2	2	1	1	966	1	3853		1577	1577	1577
tolQ_1		Tol-Pal system protein TolQ	2	2	1	1	1125	1	2437		620	620	620
exbD_1		Biopolymer transport protein ExbD	2	2	1	1	1126	1	2438		404	404	404
group_1692		putative methionine sulfoxide reductase	2	2	1	1	1127	1	2439		521	521	521
group_1693		hypothetical protein	2	2	1	1	1128	1	2440		1055	1055	1055
group_1694		dihydrofolate reductase	2	2	1	1	1129	1	2441		509	509	509
group_1695		thymidylate synthase	2	2	1	1	1130	1	2442		842	842	842
group_1696		hypothetical protein	2	2	1	1	1131	1	2443		362	362	362
group_1697		hypothetical protein	2	2	1	1	1132	1	2444		359	359	359
lgt		Phosphatidylglycerol--prolipoprotein diacylglyceryl transferase	2	2	1	1	1133	1	2445		818	818	818
group_1699		hypothetical protein	2	2	1	1	1134	1	2446		779	779	779
pcaI_2		3-oxoadipate CoA-transferase subunit A	2	2	1	1	2066	1	2336		671	671	671
group_1700		hypothetical protein	2	2	1	1	1135	1	2447		2192	2192	2192
group_1701		hypothetical protein	2	2	1	1	1136	1	2448		2180	2180	2180
tatC_1		Sec-independent protein translocase protein TatC	2	2	1	1	1137	1	2449		770	770	770
tatB_1		Sec-independent protein translocase protein TatB	2	2	1	1	1138	1	2450		437	437	437
tatA_1		Sec-independent protein translocase protein TatA	2	2	1	1	1139	1	2451		218	218	218
group_1705		hypothetical protein	2	2	1	1	1140	1	2452		875	875	875
group_1706		dITP/XTP pyrophosphatase	2	2	1	1	1141	1	2453		626	626	626
group_1707		hypothetical protein	2	2	1	1	1142	1	2454		545	545	545
metXA		Bifunctional methionine biosynthesis protein MetXA/MetW	2	2	1	1	1144	1	2456		593	593	593
metXS		Homoserine O-succinyltransferase	2	2	1	1	1145	1	2457		1160	1160	1160
pcaI_3		3-oxoadipate CoA-transferase subunit A	2	2	1	1	1234	1	2984		671	671	671
leuA		2-isopropylmalate synthase	2	2	1	1	1146	1	2458		1697	1697	1697
PiuC		PiuC	2	2	1	1	1147	1	2459		683	683	683
bfrD		putative TonB-dependent receptor BfrD	2	2	1	1	1148	1	2460		2288	2288	2288
tig		Trigger factor	2	2	1	1	1149	1	2461		1334	1334	1334
257		gp257	2	2	1	1	1150	1	2462		605	605	605
258		gp258	2	2	1	1	1151	1	2463		1313	1313	1313
group_1716		hypothetical protein	2	2	1	1	1152	1	2464		716	716	716
group_1717		hypothetical protein	2	2	1	1	1153	1	2465		554	554	554
group_1718		hypothetical protein	2	2	1	1	2860	1	2467		830	830	830
group_1719		Baeyer-Villiger monooxygenase	2	2	1	1	2861	1	2468		1550	1550	1550
pcaI_4		3-oxoadipate CoA-transferase subunit A	2	2	1	1	504	1	3094		671	671	671
group_1720		hypothetical protein	2	2	1	1	2862	1	2469		227	227	227
adeP		Adenine permease AdeP	2	2	1	1	2863	1	2470		1319	1319	1319
group_1722		Adenine deaminase	2	2	1	1	2864	1	2471		998	998	998
yceJ_2		Cytochrome b561	2	2	1	1	2865	1	2472		557	557	557
group_1724		hypothetical protein	2	2	1	1	2866	1	2473		389	389	389
rnhB		Ribonuclease HII	2	2	1	1	2867	1	2474		566	566	566
csrA		Translational regulator CsrA	2	2	1	1	2868	1	2475		254	254	254
group_1727		Aspartate kinase	2	2	1	1	2869	1	2476		1280	1280	1280
alaS		Alanine--tRNA ligase	2	2	1	1	2870	1	2477		2636	2636	2636
epd		D-erythrose-4-phosphate dehydrogenase	2	2	1	1	2871	1	2478		1025	1025	1025
group_173		hypothetical protein	2	2	1	1	1212	1	3015		1397	1520	1458
hisZ		ATP phosphoribosyltransferase regulatory subunit	2	2	1	1	2872	1	2479		1166	1166	1166
265		PurA	2	2	1	1	2873	1	2480		1319	1319	1319
group_1732		hypothetical protein	2	2	1	1	2874	1	2481		317	317	317
loiP		Metalloprotease LoiP	2	2	1	1	2875	1	2482		785	785	785
tas		Protein tas	2	2	1	1	2876	1	2483		1049	1049	1049
vfr		Cyclic AMP receptor-like protein	2	2	1	1	2877	1	2484		707	707	707
yhfA		Protein YhfA	2	2	1	1	2878	1	2485		422	422	422
phnO		Aminoalkylphosphonate N-acetyltransferase	2	2	1	1	2879	1	2486		425	425	425
group_1738		hypothetical protein	2	2	1	1	2880	1	2487		752	752	752
clpB		Chaperone protein ClpB	2	2	1	1	2881	1	2488		2579	2579	2579
ppk_1		Polyphosphate kinase	2	2	1	1	3333	1	3766		1985	2075	2030
cinA_2		Putative competence-damage inducible protein	2	2	1	1	2882	1	2489		488	488	488
group_1741		hypothetical protein	2	2	1	1	2883	1	2490		419	419	419
rlmL		Ribosomal RNA large subunit methyltransferase K/L	2	2	1	1	2884	1	2491		2204	2204	2204
group_1743		hypothetical protein	2	2	1	1	2885	1	2492		344	344	344
pyrB		Aspartate carbamoyltransferase	2	2	1	1	2886	1	2493		1016	1016	1016
pyrC'		Dihydroorotase-like protein	2	2	1	1	2887	1	2494		1235	1235	1235
pal_2		Peptidoglycan-associated lipoprotein	2	2	1	1	2888	1	2495		1415	1415	1415
group_1747		hypothetical protein	2	2	1	1	2889	1	2496		779	779	779
group_1748	gstB_2	Glutathione S-transferase GstB	2	2	1	1	2890	1	2497		626	626	626
trmB_2		tRNA (guanine-N(7)-)-methyltransferase	2	2	1	1	2891	1	2498		716	716	716
smpB		SsrA-binding protein	2	2	1	1	1299	1	4575		374	473	423
group_1750		hypothetical protein	2	2	1	1	2892	1	2499		2438	2438	2438
gstB_2		Glutathione S-transferase GST-6.0	2	2	1	1	2893	1	2500		611	611	611
group_1752		hypothetical protein	2	2	1	1	2894	1	2501		344	344	344
group_1753		hypothetical protein	2	2	1	1	4502	1	3830		218	218	218
trmR		tRNA 5-hydroxyuridine methyltransferase	2	2	1	1	4503	1	3829		587	587	587
group_1755		hypothetical protein	2	2	1	1	4504	1	3828		215	215	215
ahpC		Alkyl hydroperoxide reductase C	2	2	1	1	4505	1	3827		563	563	563
group_1757		hypothetical protein	2	2	1	1	4506	1	3826		3857	3857	3857
group_1758		Beta-ketodecanoyl-[acyl-carrier-protein] synthase	2	2	1	1	4507	1	3825		1106	1106	1106
group_1759		hypothetical protein	2	2	1	1	4508	1	3824		1262	1262	1262
ilvD		Dihydroxy-acid dehydratase	2	2	1	1	1539	1	230		1787	1829	1808
pcaK_2		4-hydroxybenzoate transporter PcaK	2	2	1	1	4509	1	3823		1358	1358	1358
ydcO_1		Inner membrane protein YdcO	2	2	1	1	4510	1	3822		1193	1193	1193
lvr		Levodione reductase	2	2	1	1	4511	1	3821		785	785	785
benC		Benzoate 1,2-dioxygenase electron transfer component	2	2	1	1	4512	1	3820		1016	1016	1016
cbdB		2-halobenzoate 1,2-dioxygenase small subunit	2	2	1	1	4513	1	3819		500	500	500
cbdA		2-halobenzoate 1,2-dioxygenase large subunit	2	2	1	1	4514	1	3818		1382	1382	1382
group_1766	benM_2	HTH-type transcriptional regulator BenM	2	2	1	1	4515	1	3817		959	959	959
group_1767		hypothetical protein	2	2	1	1	4516	1	3816		881	881	881
mphP		Phenol hydroxylase P5 protein	2	2	1	1	4517	1	3815		1061	1061	1061
group_1769		hypothetical protein	2	2	1	1	4518	1	3814		362	362	362
rhaS_8		HTH-type transcriptional activator RhaS	2	2	1	1	973	1	3860		725	884	804
xamoA		Alkene monooxygenase system, oxygenase component subunit alpha	2	2	1	1	4519	1	3813		1526	1526	1526
dmpM		Phenol hydroxylase P2 protein	2	2	1	1	4520	1	3812		266	266	266
mphL		Phenol hydroxylase P1 protein	2	2	1	1	4521	1	3811		998	998	998
group_1773		hypothetical protein	2	2	1	1	4522	1	3810		245	245	245
mopR		Phenol regulator MopR	2	2	1	1	4523	1	3809		1670	1670	1670
group_1775		hypothetical protein	2	2	1	1	4524	1	3808		194	194	194
actP_1		Copper-transporting P-type ATPase	2	2	1	1	4525	1	3807		2471	2471	2471
hmrR_3		HTH-type transcriptional regulator HmrR	2	2	1	1	4526	1	3806		401	401	401
group_1778		Putative glutathione-dependent formaldehyde-activating enzyme	2	2	1	1	4527	1	3805		407	407	407
yhjQ		putative cysteine-rich protein YhjQ	2	2	1	1	4528	1	3804		356	356	356
lapB		Lipopolysaccharide assembly protein B	2	2	1	1	1967	1	3204		776	800	788
group_1780		hypothetical protein	2	2	1	1	4529	1	3803		326	329	327
group_1781		hypothetical protein	2	2	1	1	4530	1	3802		593	593	593
group_1782		hypothetical protein	2	2	1	1	4531	1	3801		224	224	224
group_1783		hypothetical protein	2	2	1	1	4532	1	3800		194	194	194
xseA		Exodeoxyribonuclease 7 large subunit	2	2	1	1	4533	1	3799		1262	1262	1262
group_1785		hypothetical protein	2	2	1	1	4534	1	3798		233	233	233
group_1786		Repressor protein	2	2	1	1	4535	1	3797		671	671	671
group_1787		hypothetical protein	2	2	1	1	4536	1	3796		125	125	125
group_1788		hypothetical protein	2	2	1	1	4537	1	3795		389	389	389
group_1789		endolysin	2	2	1	1	4538	1	3794		545	545	545
group_179		hypothetical protein	2	2	1	1	595	1	2657		413	413	413
rhtB_3		Homoserine/homoserine lactone efflux protein	2	2	1	1	4539	1	3793		617	617	617
group_1791		Csp	2	2	1	1	4540	1	3792		215	215	215
group_1792		hypothetical protein	2	2	1	1	4541	1	3791		224	224	224
proC_2		Pyrroline-5-carboxylate reductase	2	2	1	1	4542	1	3790		815	815	815
group_1794		hypothetical protein	2	2	1	1	4543	1	3789		119	119	119
group_1795		hypothetical protein	2	2	1	1	4544	1	3788		458	458	458
group_1796		hypothetical protein	2	2	1	1	4545	1	3787		344	344	344
group_1797		phage putative head morphogenesis protein	2	2	1	1	4546	1	3786		1106	1106	1106
group_1798		hypothetical protein	2	2	1	1	3296	1	585		446	446	446
group_1799		hypothetical protein	2	2	1	1	3295	1	584		329	329	329
group_18		hypothetical protein	2	2	1	2	99	2	14		1082	2378	1730
group_180		hypothetical protein	2	2	1	1	3975	1	1079		413	413	413
group_1800		hypothetical protein	2	2	1	1	3294	1	583		593	593	593
group_1801		hypothetical protein	2	2	1	1	3293	1	582		629	629	629
group_1802		hypothetical protein	2	2	1	1	3292	1	581		782	782	782
group_1803		hypothetical protein	2	2	1	1	3433	1	580		545	545	545
group_1804		hypothetical protein	2	2	1	1	3434	1	579		812	812	812
group_1805		hypothetical protein	2	2	1	1	3435	1	578		296	296	296
group_1806		hypothetical protein	2	2	1	1	3436	1	577		143	143	143
group_1807		putative phage nucleotide-binding protein	2	2	1	1	3437	1	576		1118	1118	1118
group_1808		hypothetical protein	2	2	1	1	3438	1	575		329	329	329
group_1809		hypothetical protein	2	2	1	1	3439	1	574		188	188	188
group_181		gp18	2	2	1	1	620	1	2639		806	806	806
group_1810		hypothetical protein	2	2	1	1	3440	1	573		884	884	884
group_1811		hypothetical protein	2	2	1	1	3441	1	572		1049	1049	1049
group_1812		putative methyltransferase	2	2	1	1	3442	1	571		857	857	857
group_1813		prophage repressor	2	2	1	1	3443	1	570		743	743	743
group_1814		hypothetical protein	2	2	1	1	3444	1	569		257	257	257
group_1815		hypothetical protein	2	2	1	1	3445	1	568		284	284	284
group_1816		hypothetical protein	2	2	1	1	3446	1	567		275	275	275
group_1817		hypothetical protein	2	2	1	1	3447	1	566		293	293	293
group_1818		hypothetical protein	2	2	1	1	3448	1	565		962	962	962
group_1819		hypothetical protein	2	2	1	1	3449	1	564		206	206	206
group_182		minor tail protein	2	2	1	1	24	1	593		806	806	806
group_1820		hypothetical protein	2	2	1	1	3450	1	563		323	323	323
group_1821		hypothetical protein	2	2	1	1	3451	1	562		401	401	401
group_1822		hypothetical protein	2	2	1	1	3452	1	561		752	752	752
group_1823		hypothetical protein	2	2	1	1	3453	1	560		218	218	218
group_1824		hypothetical protein	2	2	1	1	3455	1	784		236	236	236
group_1825		hypothetical protein	2	2	1	1	3473	1	766		236	236	236
group_1826		hypothetical protein	2	2	1	1	3457	1	782		281	281	281
group_1827		putative repressor cI	2	2	1	1	3458	1	781		656	656	656
group_1828		hypothetical protein	2	2	1	1	3459	1	780		200	200	200
group_1829		hypothetical protein	2	2	1	1	3460	1	779		356	356	356
group_183		IS903 transposase	2	2	1	1	1848	1	3701		869	869	869
group_1830		hypothetical protein	2	2	1	1	3461	1	778		344	344	344
group_1831		hypothetical protein	2	2	1	1	3462	1	777		296	296	296
group_1832		hypothetical protein	2	2	1	1	4011	1	2777		296	296	296
group_1833		hypothetical protein	2	2	1	1	3464	1	775		929	929	929
group_1834		hypothetical protein	2	2	1	1	3466	1	773		464	464	464
group_1835		hypothetical protein	2	2	1	1	3467	1	772		401	401	401
group_1836		hypothetical protein	2	2	1	1	3468	1	771		476	476	476
group_1837		hypothetical protein	2	2	1	1	3469	1	770		254	254	254
group_1838		hypothetical protein	2	2	1	1	3470	1	769		218	218	218
group_1839		hypothetical protein	2	2	1	1	3471	1	768		260	260	260
group_184		IS903 transposase	2	2	1	1	3284	1	495		869	869	869
group_1840		putative transposase	2	2	1	1	3476	1	764		641	641	641
group_1841		phage protein	2	2	1	1	3477	1	763		506	506	506
BcepB1A gene33		gp33 TerL	2	2	1	1	3478	1	762		1658	1658	1658
group_1843		putative portal protein	2	2	1	1	3479	1	761		1412	1412	1412
group_1844		phage head morphogenesis protein	2	2	1	1	3480	1	760		581	581	581
group_1845		hypothetical protein	2	2	1	1	3481	1	759		257	257	257
group_1846		hypothetical protein	2	2	1	1	3482	1	758		1313	1313	1313
group_1847		hypothetical protein	2	2	1	1	3483	1	757		476	476	476
group_1848		putative major capsid protein	2	2	1	1	3484	1	756		1025	1025	1025
group_1849		hypothetical protein	2	2	1	1	3485	1	755		431	431	431
caiA_2		Crotonobetainyl-CoA reductase	2	2	1	1	625	1	1089		416	431	423
group_1850		hypothetical protein	2	2	1	1	3486	1	754		386	386	386
group_1851		hypothetical protein	2	2	1	1	3487	1	753		560	560	560
group_1852		hypothetical protein	2	2	1	1	3488	1	752		368	368	368
group_1853		hypothetical protein	2	2	1	1	3489	1	751		536	536	536
group_1854		hypothetical protein	2	2	1	1	3490	1	750		1121	1121	1121
group_1855		hypothetical protein	2	2	1	1	3491	1	749		443	443	443
group_1856		hypothetical protein	2	2	1	1	3492	1	748		485	485	485
group_1857		hypothetical protein	2	2	1	1	3493	1	747		152	152	152
group_1858		hypothetical protein	2	2	1	1	3494	1	746		2612	2612	2612
group_1859		hypothetical protein	2	2	1	1	3495	1	745		338	338	338
group_186		hypothetical protein	2	2	1	1	3288	1	499		323	323	323
group_1860		hypothetical protein	2	2	1	1	3496	1	744		629	629	629
group_1861		hypothetical protein	2	2	1	1	3497	1	743		299	299	299
PHI92_gene_4		Phi92_gp137	2	2	1	1	3498	1	742		995	995	995
group_1863		putative baseplate protein	2	2	1	1	3499	1	741		710	710	710
group_1864		hypothetical protein	2	2	1	1	3500	1	740		356	356	356
group_1865		hypothetical protein	2	2	1	1	3501	1	739		1181	1181	1181
group_1866		hypothetical protein	2	2	1	1	3502	1	738		593	593	593
group_1867		hypothetical protein	2	2	1	1	3503	1	737		2249	2249	2249
group_1868		hypothetical protein	2	2	1	1	3504	1	736		386	386	386
group_1869		hypothetical protein	2	2	1	1	3506	1	734		182	182	182
group_187		IS3 family transposase ISAba14	2	2	1	1	590	1	4012		305	305	305
group_1870		endolysin	2	2	1	1	3507	1	733		545	545	545
group_1871		hypothetical protein	2	2	1	1	3508	1	732		650	650	650
group_1872		hypothetical protein	2	2	1	1	3509	1	731		389	389	389
group_1873		hypothetical protein	2	2	1	1	3510	1	730		287	287	287
hcaT		putative 3-phenylpropionic acid transporter	2	2	1	1	3511	1	729		1163	1163	1163
group_1875		hypothetical protein	2	2	1	1	3512	1	728		503	503	503
accC		Biotin carboxylase	2	2	1	1	3513	1	727		1370	1370	1370
accB		Biotin carboxyl carrier protein of acetyl-CoA carboxylase	2	2	1	1	3514	1	726		419	419	419
aroQ		3-dehydroquinate dehydratase	2	2	1	1	3515	1	725		455	455	455
group_1879		error-prone lesion bypass DNA polymerase V	2	2	1	1	3516	1	724		1328	1328	1328
ptxD		Phosphonate dehydrogenase	2	2	1	1	3291	1	502		380	389	384
group_1880		hypothetical protein	2	2	1	1	3517	1	723		1010	1010	1010
pdtaR		putative transcriptional regulatory protein pdtaR	2	2	1	1	3518	1	722		590	590	590
group_1882		hypothetical protein	2	2	1	1	3519	1	721		269	269	269
nasD		Nitrite reductase [NAD(P)H]	2	2	1	1	3520	1	720		2546	2546	2546
norW		Nitric oxide reductase FlRd-NAD(+) reductase	2	2	1	1	3521	1	719		1622	1622	1622
nasA		Nitrate reductase	2	2	1	1	3522	1	718		2780	2780	2780
mobA		Molybdenum cofactor guanylyltransferase	2	2	1	1	3523	1	717		629	629	629
napA		Periplasmic nitrate reductase	2	2	1	1	3524	1	716		2279	2279	2279
moaA		GTP 3',8-cyclase	2	2	1	1	3525	1	715		1034	1034	1034
group_1889		hypothetical protein	2	2	1	1	3526	1	714		254	254	254
lipR_2		Putative acetyl-hydrolase LipR	2	2	1	1	3329	1	3065		716	893	804
moaE1		Molybdopterin synthase catalytic subunit 1	2	2	1	1	3527	1	713		488	488	488
moaC		Cyclic pyranopterin monophosphate synthase	2	2	1	1	3528	1	712		923	923	923
moeA		Molybdopterin molybdenumtransferase	2	2	1	1	3529	1	711		1235	1235	1235
group_1893		putative HTH-type transcriptional regulator	2	2	1	1	3530	1	710		482	482	482
norG_4		HTH-type transcriptional regulator NorG	2	2	1	1	3531	1	709		1439	1439	1439
group_1895		hypothetical protein	2	2	1	1	3532	1	708		863	863	863
group_1896		sulfur transfer protein, DsrC	2	2	1	1	3533	1	707		311	311	311
group_1897		hypothetical protein	2	2	1	1	3534	1	706		284	284	284
group_1898		hypothetical protein	2	2	1	1	3535	1	705		350	350	350
tusD		Sulfurtransferase TusD	2	2	1	1	3536	1	704		368	368	368
344_1		Alkyl hydroperoxide reductase subunit F	2	2	1	1	4423	1	1205		626	1565	1095
tnsB		Transposon Tn7 transposition protein TnsB	2	2	1	1	999	1	2913		1910	1910	1910
group_1900		ADP-L-glycero-D-mannoheptose-6-epimerase	2	2	1	1	3537	1	703		1007	1007	1007
fumC		Fumarate hydratase class II	2	2	1	1	3538	1	702		1394	1394	1394
group_1902		hypothetical protein	2	2	1	1	3539	1	701		296	296	296
group_1903		hypothetical protein	2	2	1	1	3540	1	700		461	461	461
group_1904		hypothetical protein	2	2	1	1	3541	1	699		491	491	491
dadA		D-amino acid dehydrogenase	2	2	1	1	3542	1	698		1244	1244	1244
group_1906		hypothetical protein	2	2	1	1	3543	1	697		644	644	644
ispF		2-C-methyl-D-erythritol 2,4-cyclodiphosphate synthase	2	2	1	1	3544	1	696		482	482	482
group_1908		hypothetical protein	2	2	1	1	3545	1	695		524	524	524
argF		Ornithine carbamoyltransferase, anabolic	2	2	1	1	3546	1	694		920	920	920
group_191		hypothetical protein	2	2	1	1	455	1	4045		1910	1910	1910
group_1910		hypothetical protein	2	2	1	1	3547	1	693		653	653	653
glnG		DNA-binding transcriptional regulator NtrC	2	2	1	1	3548	1	692		1493	1493	1493
glnL		Sensory histidine kinase/phosphatase NtrB	2	2	1	1	3549	1	691		1109	1109	1109
rimO		Ribosomal protein S12 methylthiotransferase RimO	2	2	1	1	3550	1	690		1343	1343	1343
pyrH		Uridylate kinase	2	2	1	1	3551	1	689		728	728	728
frr		Ribosome-recycling factor	2	2	1	1	3552	1	688		554	554	554
ispU		Ditrans,polycis-undecaprenyl-diphosphate synthase ((2E,6E)-farnesyl-diphosphate specific)	2	2	1	1	3553	1	687		752	752	752
group_1917		hypothetical protein	2	2	1	1	3554	1	686		824	824	824
dxr		1-deoxy-D-xylulose 5-phosphate reductoisomerase	2	2	1	1	3555	1	685		1196	1196	1196
rseP		Regulator of sigma-E protease RseP	2	2	1	1	3556	1	684		1355	1355	1355
group_192		hypothetical protein	2	2	1	1	453	1	1066		497	497	497
bamA_2		Outer membrane protein assembly factor BamA	2	2	1	1	3557	1	683		2525	2525	2525
group_1921		hypothetical protein	2	2	1	1	3558	1	682		503	503	503
lpxD		UDP-3-O-acylglucosamine N-acyltransferase	2	2	1	1	3559	1	681		1070	1070	1070
fabZ		3-hydroxyacyl-[acyl-carrier-protein] dehydratase FabZ	2	2	1	1	3560	1	680		485	485	485
lpxA		Acyl-[acyl-carrier-protein]--UDP-N-acetylglucosamine O-acyltransferase	2	2	1	1	3561	1	679		788	788	788
cpoB		Cell division coordinator CpoB	2	2	1	1	3562	1	678		884	884	884
recX		Regulatory protein RecX	2	2	1	1	3563	1	677		482	482	482
recA		RecA	2	2	1	1	3564	1	676		1049	1049	1049
hslR		Heat shock protein 15	2	2	1	1	3565	1	675		440	440	440
yrfG		GMP/IMP nucleotidase YrfG	2	2	1	1	3566	1	674		686	686	686
group_1930		hypothetical protein	2	2	1	1	3567	1	673		359	359	359
group_1931		hypothetical protein	2	2	1	1	3568	1	672		236	236	236
group_1932		hypothetical protein	2	2	1	1	3569	1	671		293	293	293
group_1933		putative acetyltransferase	2	2	1	1	3570	1	670		536	536	536
group_1934	decR_2	DNA-binding transcriptional activator DecR	2	2	1	1	3571	1	669		449	449	449
kynU		Kynureninase	2	2	1	1	3572	1	668		1250	1250	1250
pheP		Phenylalanine-specific permease	2	2	1	1	3573	1	667		1406	1406	1406
group_1937		hypothetical protein	2	2	1	1	3574	1	666		746	746	746
group_1938		Extracellular serine proteinase	2	2	1	1	3575	1	665		1178	1178	1178
bicA_1		Bicarbonate transporter BicA	2	2	1	1	3576	1	664		1454	1454	1454
group_1940		hypothetical protein gp28	2	2	1	1	3700	1	663		479	479	479
nudJ		Phosphatase NudJ	2	2	1	1	3698	1	4161		488	488	488
mnmA		tRNA-specific 2-thiouridylase MnmA	2	2	1	1	3697	1	4160		1133	1133	1133
hflD		High frequency lysogenization protein HflD	2	2	1	1	3696	1	4159		734	734	734
purB		Adenylosuccinate lyase	2	2	1	1	3695	1	4158		1388	1388	1388
yjdF		Inner membrane protein YjdF	2	2	1	1	3694	1	4157		641	641	641
group_1946		hypothetical protein	2	2	1	1	3693	1	4156		2186	2186	2186
group_1947		hypothetical protein	2	2	1	1	3692	1	4155		962	962	962
pstB		Phosphate import ATP-binding protein PstB	2	2	1	1	3691	1	4154		902	902	902
group_1949		hypothetical protein	2	2	1	1	3690	1	4153		1397	1397	1397
group_195		hypothetical protein	2	2	1	1	940	1	4007		293	299	296
group_1950		hypothetical protein	2	2	1	1	3689	1	4152		1379	1379	1379
sphX		Protein SphX	2	2	1	1	3688	1	4151		1031	1031	1031
aroP_2		Aromatic amino acid transport protein AroP	2	2	1	1	3687	1	4150		1379	1379	1379
ipdC		Indole-3-pyruvate decarboxylase	2	2	1	1	3686	1	4149		1721	1721	1721
lrp_3		Leucine-responsive regulatory protein	2	2	1	1	3685	1	4148		485	485	485
styD		Phenylacetaldehyde dehydrogenase	2	2	1	1	3684	1	4147		1430	1430	1430
ddc		L-2,4-diaminobutyrate decarboxylase	2	2	1	1	3683	1	4146		1532	1532	1532
dat		Diaminobutyrate--2-oxoglutarate aminotransferase	2	2	1	1	3682	1	4145		1373	1373	1373
group_1958		hypothetical protein	2	2	1	1	3681	1	4144		701	701	701
group_1959		hypothetical protein	2	2	1	1	3680	1	4143		632	632	632
group_1960		hypothetical protein	2	2	1	1	3679	1	4142		464	464	464
desA3_1		NADPH-dependent stearoyl-CoA 9-desaturase	2	2	1	1	3678	1	4141		1094	1094	1094
group_1962		NADPH oxidoreductase	2	2	1	1	3677	1	4140		1070	1070	1070
fabR_1		HTH-type transcriptional repressor FabR	2	2	1	1	3676	1	4139		695	695	695
group_1964		hypothetical protein	2	2	1	1	3675	1	4138		1016	1016	1016
rapA		RNA polymerase-associated protein RapA	2	2	1	1	3674	1	4137		2837	2837	2837
rluA_1		Dual-specificity RNA pseudouridine synthase RluA	2	2	1	1	3673	1	4136		638	638	638
group_1967		hypothetical protein	2	2	1	1	3672	1	4135		704	704	704
hemL		Glutamate-1-semialdehyde 2,1-aminomutase	2	2	1	1	3671	1	4134		1298	1298	1298
thiE_2		Thiamine-phosphate synthase	2	2	1	1	3670	1	4133		611	611	611
cas6f		CRISPR-associated endonuclease Cas6/Csy4	2	2	1	1	3669	1	4132		611	611	611
csy3		CRISPR-associated protein Csy3	2	2	1	1	3668	1	4131		1013	1013	1013
csy2		CRISPR-associated protein Csy2	2	2	1	1	3667	1	4130		884	884	884
csy1		CRISPR-associated protein Csy1	2	2	1	1	3666	1	4129		1250	1250	1250
cas3		CRISPR-associated nuclease/helicase Cas3 subtype I-F/YPEST	2	2	1	1	3665	1	4128		3374	3374	3374
cas1		CRISPR-associated endonuclease Cas1	2	2	1	1	3664	1	4127		947	947	947
group_1976		hypothetical protein	2	2	1	1	3663	1	4126		377	377	377
group_1977		hypothetical protein	2	2	1	1	3662	1	4125		1463	1463	1463
group_1978		hypothetical protein	2	2	1	1	3661	1	4124		632	632	632
group_1979		hypothetical protein	2	2	1	1	3660	1	4123		383	383	383
group_1980		hypothetical protein	2	2	1	1	3659	1	4122		2762	2762	2762
yddE_2		putative isomerase YddE	2	2	1	1	3658	1	4121		815	815	815
tcyP		L-cystine uptake protein TcyP	2	2	1	1	3657	1	4120		1394	1394	1394
gltR_3		HTH-type transcriptional regulator GltR	2	2	1	1	3656	1	4119		881	881	881
group_1984		hypothetical protein	2	2	1	1	3655	1	4118		1178	1178	1178
group_1985		hypothetical protein	2	2	1	1	3654	1	4117		410	410	410
group_1986		hypothetical protein	2	2	1	1	3653	1	4116		491	491	491
group_1987	icd_2	Isocitrate dehydrogenase [NADP]	2	2	1	1	3652	1	4115		1256	1256	1256
group_1988		hypothetical protein	2	2	1	1	3651	1	4114		791	791	791
icd_1		Isocitrate dehydrogenase [NADP]	2	2	1	1	3650	1	4113		2237	2237	2237
group_1990		hypothetical protein	2	2	1	1	3649	1	4112		1703	1703	1703
group_1991		penicillin-binding protein 6b	2	2	1	1	3648	1	4111		1319	1319	1319
ndh		NADH dehydrogenase	2	2	1	1	3647	1	4110		1286	1286	1286
slyD		FKBP-type peptidyl-prolyl cis-trans isomerase SlyD	2	2	1	1	3646	1	4109		482	482	482
phrB		Deoxyribodipyrimidine photo-lyase	2	2	1	1	3645	1	4108		1442	1442	1442
group_1995		hypothetical protein	2	2	1	1	3644	1	4107		740	740	740
group_1996		hypothetical protein	2	2	1	1	3643	1	4106		896	896	896
arnC		Undecaprenyl-phosphate 4-deoxy-4-formamido-L-arabinose transferase	2	2	1	1	3642	1	4105		1250	1250	1250
group_1998		hypothetical protein	2	2	1	1	3641	1	4104		1844	1844	1844
group_1999		hypothetical protein	2	2	1	1	3640	1	4103		905	905	905
sacA		UDP-N-acetylglucosamine 2-epimerase	2	2	1	1	3639	1	4102		1136	1136	1136
group_2001		hypothetical protein	2	2	1	1	3638	1	4101		1220	1220	1220
group_2002		hypothetical protein	2	2	1	1	3637	1	4100		701	701	701
group_2003		Nitronate monooxygenase	2	2	1	1	3636	1	4099		1046	1046	1046
dusB		tRNA-dihydrouridine synthase B	2	2	1	1	3635	1	4098		1025	1025	1025
group_2005		hypothetical protein	2	2	1	1	3634	1	4097		1208	1208	1208
group_2006		putative phosphatase	2	2	1	1	3633	1	4096		656	656	656
proB		Glutamate 5-kinase	2	2	1	1	3632	1	4095		1133	1133	1133
obg		GTPase Obg	2	2	1	1	3631	1	4094		1220	1220	1220
group_2009		hypothetical protein	2	2	1	1	3630	1	4093		674	674	674
group_2010		hypothetical protein	2	2	1	1	3629	1	4092		734	734	734
gap2		Glyceraldehyde-3-phosphate dehydrogenase-like protein	2	2	1	1	3628	1	4091		1457	1457	1457
rarD		Protein RarD	2	2	1	1	3627	1	4090		944	944	944
blc		Outer membrane lipoprotein Blc	2	2	1	1	3626	1	4089		587	587	587
uvrB_2		UvrABC system protein B	2	2	1	1	3625	1	4088		2021	2021	2021
group_2015		hypothetical protein	2	2	1	1	3624	1	4087		791	791	791
group_2016		hypothetical protein	2	2	1	1	3623	1	4086		1436	1436	1436
group_2017		hypothetical protein	2	2	1	1	3622	1	4085		179	179	179
aatA		Aspartate/prephenate aminotransferase	2	2	1	1	3621	1	4084		1235	1235	1235
group_2019		hypothetical protein	2	2	1	1	3620	1	4083		410	410	410
group_2020		hypothetical protein	2	2	1	1	3619	1	4082		437	437	437
group_2021		hypothetical protein	2	2	1	1	3618	1	4081		428	428	428
ydfG		NADP-dependent 3-hydroxy acid dehydrogenase YdfG	2	2	1	1	3617	1	4080		758	758	758
group_2023		hypothetical protein	2	2	1	1	3616	1	4079		644	644	644
pdxJ		Pyridoxine 5'-phosphate synthase	2	2	1	1	3615	1	4078		725	725	725
recO		DNA repair protein RecO	2	2	1	1	3614	1	2258		713	713	713
group_2026		hypothetical protein	2	2	1	1	3613	1	2259		200	200	200
era		GTPase Era	2	2	1	1	3612	1	2260		1028	1028	1028
rnc		Ribonuclease 3	2	2	1	1	3611	1	2261		692	692	692
group_2029		hypothetical protein	2	2	1	1	3610	1	2262		374	374	374
lepB		Signal peptidase I	2	2	1	1	3609	1	2263		827	827	827
lepA		Elongation factor 4	2	2	1	1	3608	1	2264		1817	1817	1817
group_2032		hypothetical protein	2	2	1	1	3607	1	2265		449	449	449
degQ		Periplasmic pH-dependent serine endoprotease DegQ	2	2	1	1	3606	1	2266		1376	1376	1376
nadB		L-aspartate oxidase	2	2	1	1	3605	1	2267		1649	1649	1649
group_2035		hypothetical protein	2	2	1	1	3604	1	2268		416	416	416
group_2036		putative thymidylate kinase	2	2	1	1	3603	1	2269		599	599	599
mltG		Endolytic murein transglycosylase	2	2	1	1	3602	1	2270		1070	1070	1070
pabC		Aminodeoxychorismate lyase	2	2	1	1	3601	1	2271		812	812	812
sbp_2		Sulfate-binding protein	2	2	1	1	3600	1	2272		1007	1007	1007
group_2040		hypothetical protein	2	2	1	1	3599	1	2273		608	608	608
cysT		Sulfate transport system permease protein CysT	2	2	1	1	3598	1	2274		833	833	833
cysW		Sulfate transport system permease protein CysW	2	2	1	1	3597	1	2275		884	884	884
cysA		Sulfate/thiosulfate import ATP-binding protein CysA	2	2	1	1	3596	1	2276		1061	1061	1061
ssuR		HTH-type transcriptional regulator SsuR	2	2	1	1	3595	1	2277		923	923	923
group_2045		hypothetical protein	2	2	1	1	3594	1	2278		749	749	749
dapD		2,3,4,5-tetrahydropyridine-2,6-dicarboxylate N-succinyltransferase	2	2	1	1	3593	1	2279		821	821	821
group_2047		putative radical activating enzyme	2	2	1	1	3592	1	2280		710	710	710
group_2048		queuosine biosynthesis protein QueC	2	2	1	1	3591	1	2281		671	671	671
group_2049		hypothetical protein	2	2	1	1	3590	1	2282		416	416	416
group_2050		hypothetical protein	2	2	1	1	3589	1	2283		686	686	686
bcp		Peroxiredoxin Bcp	2	2	1	1	3588	1	2284		461	461	461
group_2052		hypothetical protein	2	2	1	1	3587	1	2285		569	569	569
group_2053		bifunctional NMN adenylyltransferase	2	2	1	1	3586	1	2286		632	632	632
paaF_4		2,3-dehydroadipyl-CoA hydratase	2	2	1	1	3585	1	2287		800	800	800
group_2055		GTP cyclohydrolase 1 type 2	2	2	1	1	3584	1	2288		317	317	317
group_2056		hypothetical protein	2	2	1	1	3583	1	2289		125	125	125
bcr_2		Bicyclomycin resistance protein	2	2	1	1	3582	1	2290		1205	1205	1205
purL		Phosphoribosylformylglycinamidine synthase	2	2	1	1	3581	1	2291		3833	3833	3833
dgt		Deoxyguanosinetriphosphate triphosphohydrolase	2	2	1	1	3580	1	2292		1340	1340	1340
ruvA		Holliday junction ATP-dependent DNA helicase RuvA	2	2	1	1	3579	1	2293		599	599	599
ruvB_1		Holliday junction ATP-dependent DNA helicase RuvB	2	2	1	1	3578	1	2294		1004	1004	1004
hipO		Hippurate hydrolase	2	2	1	1	3577	1	2295		1334	1334	1334
ybgC		Acyl-CoA thioesterase YbgC	2	2	1	1	2109	1	2296		407	407	407
tolQ_2		Tol-Pal system protein TolQ	2	2	1	1	2110	1	2297		698	698	698
exbD_2		Biopolymer transport protein ExbD	2	2	1	1	2111	1	2298		452	452	452
group_2066		hypothetical protein	2	2	1	1	2112	1	2299		1403	1403	1403
tolB		Tol-Pal system protein TolB	2	2	1	1	2113	1	2300		1280	1280	1280
pal_1		Peptidoglycan-associated lipoprotein	2	2	1	1	2114	1	2301		563	563	563
group_2069		hypothetical protein	2	2	1	1	2115	1	2302		188	188	188
fbp_1		Fructose-1,6-bisphosphatase class 1	2	2	1	1	2116	1	2303		971	971	971
rlmB_2		23S rRNA (guanosine-2'-O-)-methyltransferase RlmB	2	2	1	1	2117	1	2304		776	776	776
group_2072		hypothetical protein	2	2	1	1	2118	1	2305		614	614	614
group_2073		hypothetical protein	2	2	1	1	2119	1	2306		320	320	320
group_2074		hypothetical protein	2	2	1	1	2120	1	2307		389	389	389
group_2075		hypothetical protein	2	2	1	1	2121	1	2308		2429	2429	2429
group_2076		hypothetical protein	2	2	1	1	2122	1	2309		1853	1853	1853
hda		DnaA regulatory inactivator Hda	2	2	1	1	2123	1	2310		698	698	698
group_2078		Putative transport protein	2	2	1	1	2124	1	2311		1193	1193	1193
purM		phosphoribosylaminoimidazole synthetase	2	2	1	1	2125	1	2312		1070	1070	1070
group_2080		cyanobacterial phosphoribosylglycinamide formyltransferase	2	2	1	1	2126	1	2313		629	629	629
group_2081		hypothetical protein	2	2	1	1	2127	1	2314		809	809	809
group_2082		hypothetical protein	2	2	1	1	2128	1	2315		1097	1097	1097
lpxL_2		Lipid A biosynthesis lauroyltransferase	2	2	1	1	2129	1	2316		983	983	983
comEC		ComE operon protein 3	2	2	1	1	2130	1	2317		2432	2432	2432
group_2085		ABC transporter	2	2	1	1	2131	1	2318		686	686	686
lolE		Lipoprotein-releasing system transmembrane protein LolE	2	2	1	1	2132	1	2319		1280	1280	1280
group_2087		hypothetical protein	2	2	1	1	2133	1	2320		908	908	908
group_2088		hypothetical protein	2	2	1	1	2134	1	2321		467	467	467
group_2089		hypothetical protein	2	2	1	1	2135	1	2322		941	941	941
group_2090		hypothetical protein	2	2	1	1	2136	1	2323		146	146	146
serC		Phosphoserine aminotransferase	2	2	1	1	2137	1	2324		1079	1079	1079
group_2092		hypothetical protein	2	2	1	1	2138	1	2325		1487	1487	1487
emrA_1		Colistin resistance protein EmrA	2	2	1	1	2139	1	2326		1121	1121	1121
group_2094		hypothetical protein	2	2	1	1	2140	1	2327		1070	1070	1070
ybhR_1		putative multidrug ABC transporter permease YbhR	2	2	1	1	2141	1	2328		1091	1091	1091
chbG		Chitooligosaccharide deacetylase	2	2	1	1	2142	1	2329		794	794	794
gtrB		bactoprenol glucosyltransferase	2	2	1	1	2143	1	2330		980	980	980
group_2098		hypothetical protein	2	2	1	1	2144	1	2331		380	380	380
arnT_1		Undecaprenyl phosphate-alpha-4-amino-4-deoxy-L-arabinose arabinosyl transferase	2	2	1	1	2145	1	2332		830	830	830
344_3		Alkyl hydroperoxide reductase subunit F	2	2	1	1	2895	1	2502		581	1565	1073
group_2100		hypothetical protein	2	2	1	1	2108	1	2378		284	284	284
aqdA1		putative N-octanoylanthranilate hydrolase AqdA1	2	2	1	1	2107	1	2377		863	863	863
group_2102		hypothetical protein	2	2	1	1	2106	1	2376		548	548	548
group_2103		hypothetical protein	2	2	1	1	2105	1	2375		299	299	299
group_2104		hypothetical protein	2	2	1	1	2104	1	2374		428	428	428
group_2105		hypothetical protein	2	2	1	1	2103	1	2373		569	569	569
group_2106		putative protein	2	2	1	1	2102	1	2372		1019	1019	1019
iscR_2		HTH-type transcriptional regulator IscR	2	2	1	1	2101	1	2371		548	548	548
group_2108		NADH dehydrogenase-like protein	2	2	1	1	2100	1	2370		1205	1205	1205
group_2109		hypothetical protein	2	2	1	1	2099	1	2369		692	692	692
hmrR_2		HTH-type transcriptional regulator HmrR	2	2	1	1	2098	1	2368		416	416	416
yyaP		putative protein YyaP	2	2	1	1	2097	1	2367		575	575	575
group_2112		hypothetical protein	2	2	1	1	2096	1	2366		1067	1067	1067
namA_3		NADPH dehydrogenase	2	2	1	1	2095	1	2365		1238	1238	1238
ohrR_1		Organic hydroperoxide resistance transcriptional regulator	2	2	1	1	2094	1	2364		422	422	422
aes_2		Acetyl esterase	2	2	1	1	2093	1	2363		1010	1010	1010
group_2116		hypothetical protein	2	2	1	1	2092	1	2362		806	806	806
group_2117		hypothetical protein	2	2	1	1	2091	1	2361		1043	1043	1043
katA		Catalase	2	2	1	1	2090	1	2360		1520	1520	1520
60		hydrolase	2	2	1	1	2089	1	2359		830	830	830
group_2120		hypothetical protein	2	2	1	1	2088	1	2358		893	893	893
group_2121	calB_2	Coniferyl aldehyde dehydrogenase	2	2	1	1	2087	1	2357		1445	1445	1445
group_2122		2-haloacrylate reductase	2	2	1	1	2086	1	2356		986	986	986
actP_2		Cation/acetate symporter ActP	2	2	1	1	2085	1	2355		1652	1652	1652
yjcH_1		Inner membrane protein YjcH	2	2	1	1	2084	1	2354		311	311	311
dmdB		3-methylmercaptopropionyl-CoA ligase	2	2	1	1	2083	1	2353		1631	1631	1631
norR_2		Anaerobic nitric oxide reductase transcription regulator NorR	2	2	1	1	2082	1	2352		1883	1883	1883
gno		Gluconate 5-dehydrogenase	2	2	1	1	2081	1	2351		767	767	767
carC_2		Caffeyl-CoA reductase-Etf complex subunit CarC	2	2	1	1	2080	1	2350		1160	1160	1160
gpmA		2,3-bisphosphoglycerate-dependent phosphoglycerate mutase	2	2	1	1	2079	1	2349		728	728	728
group_2130		hypothetical protein	2	2	1	1	2078	1	2348		344	344	344
group_2131		hypothetical protein	2	2	1	1	2077	1	2347		989	989	989
group_2132		hypothetical protein	2	2	1	1	2075	1	2345		998	998	998
abaQ		Quinolone resistance transporter	2	2	1	1	2074	1	2344		1304	1304	1304
araC_1		L-arabonate dehydratase	2	2	1	1	2073	1	2343		1733	1733	1733
pdhR		Pyruvate dehydrogenase complex repressor	2	2	1	1	2072	1	2342		716	716	716
group_2136		hypothetical protein	2	2	1	1	2071	1	2341		794	794	794
catM		HTH-type transcriptional regulator CatM	2	2	1	1	2070	1	2340		914	914	914
catB		Muconate cycloisomerase 1	2	2	1	1	2069	1	2339		1106	1106	1106
catC		Muconolactone Delta-isomerase	2	2	1	1	2068	1	2338		290	290	290
group_214		hypothetical protein	2	2	1	1	3788	1	3427		347	425	386
catA		Catechol 1,2-dioxygenase	2	2	1	1	2067	1	2337		920	920	920
pcaJ_2		3-oxoadipate CoA-transferase subunit B	2	2	1	1	2065	1	2335		653	653	653
pcaJ_3		3-oxoadipate CoA-transferase subunit B	2	2	1	1	1235	1	2985		653	653	653
pcaJ_4		3-oxoadipate CoA-transferase subunit B	2	2	1	1	505	1	3093		653	653	653
catD_2		3-oxoadipate enol-lactonase 2	2	2	1	1	2063	1	2333		779	779	779
feaB		Phenylacetaldehyde dehydrogenase	2	2	1	1	2062	1	1115		1487	1487	1487
tynA		Primary amine oxidase	2	2	1	1	2060	1	3030		2306	2306	2306
feaR		Transcriptional activator FeaR	2	2	1	1	1269	1	3031		914	914	914
C1-hpah_2		p-hydroxyphenylacetate 3-hydroxylase, reductase component	2	2	1	1	1268	1	3032		953	953	953
yeaX		Carnitine monooxygenase reductase subunit	2	2	1	1	1267	1	3033		953	953	953
group_215		putative large terminase subunit	2	2	1	1	301	1	4304		1367	2546	1956
fabG_3		3-oxoacyl-[acyl-carrier-protein] reductase FabG	2	2	1	1	1266	1	3034		737	737	737
group_2151		hypothetical protein	2	2	1	1	1265	1	3035		485	485	485
antA_2		Anthranilate 1,2-dioxygenase large subunit	2	2	1	1	1264	1	3036		1277	1277	1277
group_2153		hypothetical protein	2	2	1	1	1263	1	3037		527	527	527
group_2154		hypothetical protein	2	2	1	1	1262	1	3038		359	359	359
hsaA		Flavin-dependent monooxygenase, oxygenase subunit HsaA	2	2	1	1	1261	1	3039		1166	1166	1166
gatA_2		Glutamyl-tRNA(Gln) amidotransferase subunit A	2	2	1	1	1260	1	3040		1109	1109	1109
group_2157		hypothetical protein	2	2	1	1	1259	1	3041		542	542	542
nanT_2		Sialic acid transporter NanT	2	2	1	1	1258	1	3042		1349	1349	1349
group_2159	nicP_1	Porin-like protein NicP	2	2	1	1	1257	1	3043		1256	1256	1256
group_216		hypothetical protein	2	2	1	1	269	1	4272		176	218	197
group_2160		putative oxidoreductase	2	2	1	1	1256	1	3044		743	743	743
group_2161		hypothetical protein	2	2	1	1	1255	1	3045		698	698	698
group_2162		hypothetical protein	2	2	1	1	1254	1	3046		1121	1121	1121
bbsG		(R)-benzylsuccinyl-CoA dehydrogenase	2	2	1	1	1253	1	3047		1244	1244	1244
leuO		HTH-type transcriptional regulator LeuO	2	2	1	1	1252	1	3048		920	920	920
pcaU		Pca operon regulatory protein	2	2	1	1	1251	1	3049		812	812	812
group_2166		putative metallo-hydrolase	2	2	1	1	1250	1	3050		866	866	866
group_2167		hypothetical protein	2	2	1	1	1249	1	3051		413	413	413
group_2168		hypothetical protein	2	2	1	1	1248	1	3052		413	413	413
group_2169		hypothetical protein	2	2	1	1	1247	1	3053		467	467	467
group_217		hypothetical protein	2	2	1	1	256	1	4259		245	290	267
oprB_2		Porin B	2	2	1	1	1245	1	2995		1319	1319	1319
quiC		3-dehydroshikimate dehydratase	2	2	1	1	1244	1	2994		1451	1451	1451
quiB		Catabolic 3-dehydroquinate dehydratase	2	2	1	1	1243	1	2993		833	833	833
pcaG		Protocatechuate 3,4-dioxygenase alpha chain	2	2	1	1	1242	1	2992		629	629	629
pcaH		Protocatechuate 3,4-dioxygenase beta chain	2	2	1	1	1241	1	2991		725	725	725
group_2175		hypothetical protein	2	2	1	1	1240	1	2990		413	413	413
pcaK_5		4-hydroxybenzoate transporter PcaK	2	2	1	1	1239	1	2989		1355	1355	1355
catD_3		3-oxoadipate enol-lactonase 2	2	2	1	1	1238	1	2988		785	785	785
pcaB		3-carboxy-cis,cis-muconate cycloisomerase	2	2	1	1	1237	1	2987		1355	1355	1355
ispD		2-C-methyl-D-erythritol 4-phosphate cytidylyltransferase	2	2	1	1	1233	1	2983		716	716	716
group_218		hypothetical protein	2	2	1	1	823	1	4218		131	251	191
ftsB		Cell division protein FtsB	2	2	1	1	1232	1	2982		389	389	389
group_2181		hypothetical protein	2	2	1	1	1231	1	2996		296	296	296
group_2182		hypothetical protein	2	2	1	1	1230	1	2997		278	278	278
eno		Enolase	2	2	1	1	1229	1	2998		1289	1289	1289
kdsA		2-dehydro-3-deoxyphosphooctonate aldolase	2	2	1	1	1228	1	2999		857	857	857
pyrG		CTP synthase	2	2	1	1	1227	1	3000		1637	1637	1637
group_2186		hypothetical protein	2	2	1	1	1226	1	3001		488	488	488
group_2187		hypothetical protein	2	2	1	1	1225	1	3002		845	845	845
group_2188		hypothetical protein	2	2	1	1	1224	1	3003		1094	1094	1094
group_2189		hypothetical protein	2	2	1	1	1223	1	3004		716	716	716
group_219		hypothetical protein	2	2	1	1	846	1	4195		161	254	207
group_2190		hypothetical protein	2	2	1	1	1222	1	3005		407	407	407
fadH_1		2,4-dienoyl-CoA reductase	2	2	1	1	1221	1	3006		2024	2024	2024
group_2192		hypothetical protein	2	2	1	1	1220	1	3007		560	560	560
menH_4		2-succinyl-6-hydroxy-2,4-cyclohexadiene-1-carboxylate synthase	2	2	1	1	1219	1	3008		917	917	917
group_2194		phospho-2-dehydro-3-deoxyheptonate aldolase	2	2	1	1	1218	1	3009		1055	1055	1055
group_2195		hypothetical protein	2	2	1	1	1217	1	3010		362	362	362
group_2196		ATP-dependent Clp protease ATP-binding subunit clpA	2	2	1	1	1216	1	3011		2276	2276	2276
clpS		ATP-dependent Clp protease adapter protein ClpS	2	2	1	1	1215	1	3012		413	413	413
group_2198		hypothetical protein	2	2	1	1	1214	1	3013		752	752	752
argC		N-acetyl-gamma-glutamyl-phosphate reductase	2	2	1	1	1213	1	3014		1049	1049	1049
group_220		hypothetical protein	2	2	1	1	865	1	3447		158	227	192
group_2200		hypothetical protein	2	2	1	1	4591	1	609		680	680	680
rpiA		Ribose-5-phosphate isomerase A	2	2	1	1	4590	1	610		671	671	671
ilvA		L-threonine dehydratase biosynthetic IlvA	2	2	1	1	4589	1	611		1541	1541	1541
ktrA		Ktr system potassium uptake protein A	2	2	1	1	4588	1	612		650	650	650
ktrB		Ktr system potassium uptake protein B	2	2	1	1	4587	1	613		1337	1337	1337
group_2205		Putative phospholipase A1	2	2	1	1	4586	1	614		1151	1151	1151
group_2206		hypothetical protein	2	2	1	1	4585	1	615		2939	2939	2939
group_2207		hypothetical protein	2	2	1	1	4584	1	616		89	89	89
cntO_4		Metal-pseudopaline receptor CntO	2	2	1	1	4583	1	617		2114	2114	2114
RBKS		Ribokinase	2	2	1	1	4582	1	618		1004	1004	1004
group_2210		hypothetical protein	2	2	1	1	4581	1	619		308	308	308
group_2211		hypothetical protein	2	2	1	1	4580	1	620		608	608	608
group_2212		hypothetical protein	2	2	1	1	4579	1	621		194	194	194
cydA		Cytochrome bd ubiquinol oxidase subunit 1	2	2	1	1	4578	1	622		1586	1586	1586
cydB_2		Cytochrome bd-I ubiquinol oxidase subunit 2	2	2	1	1	4577	1	623		1145	1145	1145
group_2215		hypothetical protein	2	2	1	1	4576	1	624		101	101	101
group_2216		hypothetical protein	2	2	1	1	4575	1	625		296	296	296
group_2217		hypothetical protein	2	2	1	1	4574	1	626		671	671	671
group_2218		hypothetical protein	2	2	1	1	4573	1	627		596	596	596
ftsY		Signal recognition particle receptor FtsY	2	2	1	1	4572	1	628		1106	1106	1106
group_2220		hypothetical protein	2	2	1	1	4571	1	629		326	326	326
group_2221		hypothetical protein	2	2	1	1	4570	1	630		359	359	359
group_2222		hypothetical protein	2	2	1	1	4569	1	631		233	233	233
group_2223		hypothetical protein	2	2	1	1	4568	1	632		425	425	425
IMPDH		Inosine-5'-monophosphate dehydrogenase	2	2	1	1	4567	1	633		431	431	431
argD		Acetylornithine aminotransferase	2	2	1	1	4566	1	634		1208	1208	1208
group_2226		hypothetical protein	2	2	1	1	4565	1	635		509	509	509
group_2227		hypothetical protein	2	2	1	1	4564	1	636		323	323	323
map_1		Methionine aminopeptidase	2	2	1	1	4561	1	638		794	794	794
brnQ		Branched-chain amino acid transport system 2 carrier protein	2	2	1	1	4560	1	639		1301	1301	1301
group_2230		hypothetical protein	2	2	1	1	4559	1	640		419	419	419
group_2231		hypothetical protein	2	2	1	1	4558	1	641		245	245	245
group_2232		hypothetical protein	2	2	1	1	4557	1	642		464	464	464
group_2233		hypothetical protein	2	2	1	1	4556	1	643		860	860	860
group_2234		hypothetical protein	2	2	1	1	4555	1	644		2858	2858	2858
lacC		Tagatose-6-phosphate kinase	2	2	1	1	4554	1	645		947	947	947
fruA		PTS system fructose-specific EIIB'BC component	2	2	1	1	4553	1	646		1718	1718	1718
group_2237		hypothetical protein	2	2	1	1	4552	1	647		464	464	464
group_2238		hypothetical protein	2	2	1	1	4551	1	648		215	215	215
group_2239		hypothetical protein	2	2	1	1	4550	1	649		2093	2093	2093
group_2240		Putative universal stress protein	2	2	1	1	4549	1	650		443	443	443
gdhB		Quinoprotein glucose dehydrogenase B	2	2	1	1	4548	1	3784		1442	1442	1442
group_2242		phospho-2-dehydro-3-deoxyheptonate aldolase	2	2	1	1	650	1	3782		1184	1184	1184
cobS		Adenosylcobinamide-GDP ribazoletransferase	2	2	1	1	649	1	939		743	743	743
group_2244		hypothetical protein	2	2	1	1	648	1	938		1568	1568	1568
pspB		Putative phosphoserine phosphatase 2	2	2	1	1	647	1	937		578	578	578
cobT		Nicotinate-nucleotide--dimethylbenzimidazole phosphoribosyltransferase	2	2	1	1	646	1	936		1055	1055	1055
cobP		Bifunctional adenosylcobalamin biosynthesis protein CobP	2	2	1	1	645	1	935		518	518	518
group_2248		hypothetical protein	2	2	1	1	644	1	934		626	626	626
mtlD		Mannitol-1-phosphate 5-dehydrogenase	2	2	1	1	643	1	933		2147	2147	2147
group_2250		hypothetical protein	2	2	1	1	642	1	932		620	620	620
group_2251		hypothetical protein	2	2	1	1	641	1	931		338	338	338
group_2252		hypothetical protein	2	2	1	1	640	1	930		1523	1523	1523
group_2253		hypothetical protein	2	2	1	1	639	1	929		293	293	293
group_2254		hypothetical protein	2	2	1	1	1680	1	924		617	617	617
group_2255		hypothetical protein	2	2	1	1	1681	1	923		770	770	770
group_2256		hypothetical protein	2	2	1	1	1682	1	922		1910	1910	1910
sbnF		2-[(L-alanin-3-ylcarbamoyl)methyl]-3-(2-aminoethylcarbamoyl)-2-hydroxypropanoate synthase	2	2	1	1	1683	1	921		1841	1841	1841
farB		Fatty acid resistance protein FarB	2	2	1	1	1684	1	920		1439	1439	1439
iucD_1		L-lysine N6-monooxygenase	2	2	1	1	1685	1	919		1433	1433	1433
iucA		N(2)-citryl-N(6)-acetyl-N(6)-hydroxylysine synthase	2	2	1	1	1686	1	918		1784	1784	1784
ybaK		Cys-tRNA(Pro)/Cys-tRNA(Cys) deacylase YbaK	2	2	1	1	1687	1	917		464	464	464
group_2262		hypothetical protein	2	2	1	1	1688	1	916		302	302	302
ubiB_3		protein kinase UbiB	2	2	1	1	1689	1	915		1373	1373	1373
acdA_1		Acyl-CoA dehydrogenase	2	2	1	1	1690	1	914		1292	1292	1292
caiA_1		Crotonobetainyl-CoA reductase	2	2	1	1	1691	1	913		1205	1205	1205
alkB		Alkane 1-monooxygenase	2	2	1	1	1692	1	912		1223	1223	1223
group_2267		IS5 family transposase IS4811	2	2	1	1	1693	1	911		965	965	965
ppiD		Peptidyl-prolyl cis-trans isomerase D	2	2	1	1	1694	1	910		1865	1865	1865
group_2269		gp04	2	2	1	1	1695	1	909		272	272	272
group_2270		hypothetical protein	2	2	1	1	1696	1	908		455	455	455
group_2271		hypothetical protein	2	2	1	1	1697	1	907		647	647	647
iscR_1		HTH-type transcriptional regulator IscR	2	2	1	1	1698	1	906		473	473	473
iscS		Cysteine desulfurase IscS	2	2	1	1	1699	1	905		1217	1217	1217
iscU		Iron-sulfur cluster assembly scaffold protein IscU	2	2	1	1	1700	1	904		386	386	386
iscA		Iron-binding protein IscA	2	2	1	1	1701	1	903		320	320	320
hscB		Co-chaperone protein HscB	2	2	1	1	1702	1	902		518	518	518
hscA		Chaperone protein HscA	2	2	1	1	1703	1	901		1859	1859	1859
fdx_1		2Fe-2S ferredoxin	2	2	1	1	1704	1	900		338	338	338
group_2279		hypothetical protein	2	2	1	1	1705	1	899		836	836	836
group_2280		hypothetical protein	2	2	1	1	1706	1	898		617	617	617
group_2281		hypothetical protein	2	2	1	1	1707	1	897		434	434	434
mfd		Transcription-repair-coupling factor	2	2	1	1	1708	1	896		3461	3461	3461
group_2283		hypothetical protein	2	2	1	1	1709	1	895		356	356	356
yfeX_1		Dye-decolorizing peroxidase YfeX	2	2	1	1	1710	1	894		941	941	941
group_2285		hypothetical protein	2	2	1	1	1711	1	893		779	779	779
group_2286		Putative 4-hydroxy-4-methyl-2-oxoglutarate aldolase	2	2	1	1	1712	1	892		506	506	506
group_2287		hypothetical protein	2	2	1	1	1713	1	891		665	665	665
rpsT		30S ribosomal protein S20	2	2	1	1	1714	1	890		266	266	266
group_2289		hypothetical protein	2	2	1	1	1715	1	889		734	734	734
cysQ		3'(2'),5'-bisphosphate nucleotidase CysQ	2	2	1	1	1716	1	888		857	857	857
group_2291		hypothetical protein	2	2	1	1	1717	1	887		368	368	368
group_2292		hypothetical protein gp28	2	2	1	1	1718	1	886		734	734	734
gsiA		Glutathione import ATP-binding protein GsiA	2	2	1	1	1719	1	885		1730	1730	1730
group_2294		hypothetical protein	2	2	1	1	1720	1	884		1142	1142	1142
gsiC_1		Glutathione transport system permease protein GsiC	2	2	1	1	1721	1	883		938	938	938
prlC_2		Oligopeptidase A	2	2	1	1	1722	1	882		2012	2012	2012
oppA_1		Oligopeptide-binding protein OppA	2	2	1	1	1723	1	881		1820	1820	1820
hbpA		Heme-binding protein A	2	2	1	1	1724	1	880		1784	1784	1784
group_2299		hypothetical protein	2	2	1	1	1725	1	879		92	92	92
btuB_3		Vitamin B12 transporter BtuB	2	2	1	1	1726	1	878		2699	2699	2699
group_2301		hypothetical protein	2	2	1	1	1727	1	877		716	716	716
tolQ_3		Tol-Pal system protein TolQ	2	2	1	1	1728	1	876		878	878	878
exbD_3		Biopolymer transport protein ExbD	2	2	1	1	1729	1	875		422	422	422
exbD_4		Biopolymer transport protein ExbD	2	2	1	1	1730	1	874		413	413	413
group_2305		hypothetical protein	2	2	1	1	1731	1	873		449	449	449
glcB		Malate synthase G	2	2	1	1	1732	1	872		2165	2165	2165
zapE		Cell division protein ZapE	2	2	1	1	1733	1	871		1142	1142	1142
group_2308		putative HTH-type transcriptional regulator	2	2	1	1	1734	1	870		1019	1019	1019
group_2309		Baeyer-Villiger monooxygenase	2	2	1	1	1735	1	869		1508	1508	1508
group_2310		hypothetical protein	2	2	1	1	1736	1	868		911	911	911
pyrF		Orotidine 5'-phosphate decarboxylase	2	2	1	1	1737	1	867		698	698	698
group_2312		hypothetical protein	2	2	1	1	1738	1	866		365	365	365
group_2313		DNA binding protein HU-beta	2	2	1	1	1739	1	865		302	302	302
rpsA		30S ribosomal protein S1	2	2	1	1	1740	1	864		1673	1673	1673
cmk		Cytidylate kinase	2	2	1	1	1741	1	863		686	686	686
group_2316		hypothetical protein	2	2	1	1	1742	1	862		443	443	443
tadA		tRNA-specific adenosine deaminase	2	2	1	1	1743	1	861		476	476	476
caiD		Carnitinyl-CoA dehydratase	2	2	1	1	1744	1	860		1121	1121	1121
group_2319		uracil-DNA glycosylase	2	2	1	1	1745	1	859		713	713	713
group_2320		hypothetical protein	2	2	1	1	1746	1	858		596	596	596
xcpX		Type II secretion system protein K	2	2	1	1	1747	1	857		959	959	959
group_2322		hypothetical protein	2	2	1	1	1748	1	856		701	701	701
group_2323		hypothetical protein	2	2	1	1	1749	1	855		380	380	380
group_2324		hypothetical protein	2	2	1	1	1750	1	854		554	554	554
group_2325		hypothetical protein	2	2	1	1	1751	1	853		608	608	608
ycfH		putative metal-dependent hydrolase YcfH	2	2	1	1	1752	1	852		773	773	773
group_2327		hypothetical protein	2	2	1	1	1753	1	851		341	341	341
group_2328		hypothetical protein	2	2	1	1	1754	1	850		980	980	980
kdsB		3-deoxy-manno-octulosonate cytidylyltransferase	2	2	1	1	1755	1	849		761	761	761
lpxK		Tetraacyldisaccharide 4'-kinase	2	2	1	1	1756	1	848		1010	1010	1010
msbA_2		Lipid A export ATP-binding/permease protein MsbA	2	2	1	1	1757	1	847		1727	1727	1727
tolR		Tol-Pal system protein TolR	2	2	1	1	1758	1	846		428	428	428
tolQ_4		Tol-Pal system protein TolQ	2	2	1	1	1759	1	845		635	635	635
parB		putative chromosome-partitioning protein ParB	2	2	1	1	1760	1	844		887	887	887
group_2335		putative plasmid partitioning protein Soj	2	2	1	1	1761	1	843		782	782	782
rsmG		Ribosomal RNA small subunit methyltransferase G	2	2	1	1	1762	1	842		632	632	632
309		gp309	2	2	1	1	1763	1	841		689	689	689
amgK		N-acetylmuramate/N-acetylglucosamine kinase	2	2	1	1	1764	1	840		1013	1013	1013
lptD		LPS-assembly protein LptD	2	2	1	1	1765	1	839		2438	2438	2438
surA		Chaperone SurA	2	2	1	1	1766	1	838		1310	1310	1310
cbbA		Fructose-bisphosphate aldolase	2	2	1	1	1767	1	837		1037	1037	1037
group_2342		hypothetical protein	2	2	1	1	1768	1	836		242	242	242
pgk		Phosphoglycerate kinase	2	2	1	1	1769	1	835		1187	1187	1187
group_2344		hypothetical protein	2	2	1	1	1770	1	834		383	383	383
yceF		7-methyl-GTP pyrophosphatase	2	2	1	1	1771	1	833		593	593	593
group_2346		putative ribosomal oxygenase	2	2	1	1	1772	1	832		1163	1163	1163
group_2347		hypothetical protein	2	2	1	1	1773	1	831		566	566	566
bigR		Biofilm growth-associated repressor	2	2	1	1	1774	1	830		308	308	308
sstT		Serine/threonine transporter SstT	2	2	1	1	1775	1	829		1202	1202	1202
group_2350		hypothetical protein	2	2	1	1	1776	1	828		680	680	680
group_2351		hypothetical protein	2	2	1	1	1777	1	827		536	536	536
group_2352		Putative multidrug export ATP-binding/permease protein	2	2	1	1	1778	1	826		1847	1847	1847
group_2353		hypothetical protein	2	2	1	1	1779	1	825		440	440	440
group_2354		putative HTH-type transcriptional regulator	2	2	1	1	1780	1	824		1025	1025	1025
gcvH		Glycine cleavage system H protein	2	2	1	1	1781	1	823		374	374	374
cobB		NAD-dependent protein deacylase	2	2	1	1	1782	1	822		698	698	698
lrp_7		Leucine-responsive regulatory protein	2	2	1	1	1784	1	820		488	488	488
putA		Bifunctional protein PutA	2	2	1	1	1785	1	818		3752	3752	3752
group_2359		hypothetical protein	2	2	1	1	1786	1	817		473	473	473
trmA		tRNA/tmRNA (uracil-C(5))-methyltransferase	2	2	1	1	1787	1	816		1085	1085	1085
group_2361		hypothetical protein	2	2	1	1	1788	1	815		230	230	230
group_2362		hypothetical protein	2	2	1	1	1789	1	814		746	746	746
group_2363		hypothetical protein	2	2	1	1	1790	1	813		590	590	590
yceI		Protein YceI	2	2	1	1	1791	1	812		590	590	590
group_2365		hypothetical protein	2	2	1	1	1792	1	811		407	407	407
tktA		Transketolase 1	2	2	1	1	1793	1	810		1988	1988	1988
metK		S-adenosylmethionine synthase	2	2	1	1	1794	1	809		1166	1166	1166
group_2368		hypothetical protein	2	2	1	1	1795	1	808		248	248	248
group_2369		hypothetical protein	2	2	1	1	1796	1	807		185	185	185
group_2370		hypothetical protein	2	2	1	1	1797	1	806		560	560	560
group_2371		Beta-lactamase OXA-133	2	2	1	1	1798	1	805		824	824	824
group_2372		L-methionine sulfoximine/L-methionine sulfone acetyltransferase	2	2	1	1	1799	1	804		545	545	545
sutR_3		HTH-type transcriptional regulator SutR	2	2	1	1	1800	1	803		593	593	593
349		gp349	2	2	1	1	1801	1	802		545	545	545
nnr		Bifunctional NAD(P)H-hydrate repair enzyme Nnr	2	2	1	1	1802	1	801		1460	1460	1460
queG		Epoxyqueuosine reductase	2	2	1	1	1803	1	800		1088	1088	1088
bioB		Biotin synthase	2	2	1	1	1804	1	799		989	989	989
group_2378		hypothetical protein	2	2	1	1	1805	1	798		212	212	212
group_2379		hypothetical protein	2	2	1	1	1806	1	797		350	350	350
smf-1_1		Major fimbrial subunit SMF-1	2	2	1	1	1807	1	796		566	566	566
yadV_1		putative fimbrial chaperone YadV	2	2	1	1	1808	1	795		740	740	740
htrE_1		Outer membrane usher protein HtrE	2	2	1	1	1809	1	794		2537	2537	2537
mrkD_1		Fimbria adhesin protein	2	2	1	1	1810	1	793		1019	1019	1019
group_2384		hypothetical protein	2	2	1	1	1811	1	792		179	179	179
hdfR_2		HTH-type transcriptional regulator HdfR	2	2	1	1	1812	1	791		851	851	851
group_2386		hypothetical protein	2	2	1	1	1813	1	790		929	929	929
group_2387		hypothetical protein	2	2	1	1	1814	1	789		464	464	464
group_2388		hypothetical protein	2	2	1	1	1932	1	788		1364	1364	1364
group_2390		hypothetical protein	2	2	1	1	1930	1	3111		302	302	302
group_2391		hypothetical protein	2	2	1	1	1929	1	3112		1556	1556	1556
group_2392		hypothetical protein	2	2	1	1	1928	1	3113		275	275	275
fhuE_1		FhuE receptor	2	2	1	1	1987	1	3114		2099	2099	2099
lpxB		Lipid-A-disaccharide synthase	2	2	1	1	1988	1	3115		1175	1175	1175
group_2395		hypothetical protein	2	2	1	1	1989	1	3116		647	647	647
group_2396		hypothetical protein	2	2	1	1	1990	1	3117		1022	1022	1022
ybhF		putative multidrug ABC transporter ATP-binding protein YbhF	2	2	1	1	1991	1	3118		1757	1757	1757
ybhS		putative multidrug ABC transporter permease YbhS	2	2	1	1	1992	1	3119		1124	1124	1124
ybhR_2		putative multidrug ABC transporter permease YbhR	2	2	1	1	1993	1	3120		1118	1118	1118
group_2400		hypothetical protein	2	2	1	1	1994	1	3121		869	869	869
group_2401		hypothetical protein	2	2	1	1	1995	1	3122		461	461	461
group_2402		hypothetical protein	2	2	1	1	1996	1	3123		590	590	590
group_2403		hypothetical protein	2	2	1	1	1997	1	3124		1106	1106	1106
group_2404		hypothetical protein	2	2	1	1	1998	1	3125		413	413	413
group_2405		hypothetical protein	2	2	1	1	1999	1	3126		269	269	269
group_2406		hypothetical protein	2	2	1	1	2000	1	3127		425	425	425
group_2407		hypothetical protein	2	2	1	1	2001	1	3128		200	200	200
group_2408		hypothetical protein	2	2	1	1	2002	1	3129		224	224	224
group_2409		hypothetical protein	2	2	1	1	2003	1	3130		374	374	374
ycgJ		putative methyltransferase YcgJ	2	2	1	1	2004	1	3131		767	767	767
phaC_2		Poly(3-hydroxyalkanoate) polymerase subunit PhaC	2	2	1	1	2005	1	3132		1085	1085	1085
metZ		O-succinylhomoserine sulfhydrylase	2	2	1	1	2006	1	3133		1187	1187	1187
group_2413		hypothetical protein	2	2	1	1	2007	1	3134		236	236	236
ybaB		Nucleoid-associated protein YbaB	2	2	1	1	2008	1	3135		329	329	329
recR		Recombination protein RecR	2	2	1	1	2009	1	3136		596	596	596
rnd_2		Ribonuclease D	2	2	1	1	2010	1	3137		1124	1124	1124
group_2417		hypothetical protein	2	2	1	1	2011	1	3138		266	266	266
group_2418		hypothetical protein	2	2	1	1	2012	1	3139		335	335	335
group_2419		hypothetical protein	2	2	1	1	2013	1	3140		164	164	164
ycgL		Protein YcgL	2	2	1	1	2014	1	3141		305	305	305
group_2421		hypothetical protein	2	2	1	1	2015	1	3142		389	389	389
group_2422		hypothetical protein	2	2	1	1	2016	1	3143		851	851	851
group_2423		hypothetical protein	2	2	1	1	2017	1	3144		1187	1187	1187
trpB_2		Tryptophan synthase beta chain	2	2	1	1	2018	1	3145		1205	1205	1205
prmB		50S ribosomal protein L3 glutamine methyltransferase	2	2	1	1	2019	1	3146		1004	1004	1004
aroC		Chorismate synthase	2	2	1	1	2020	1	3147		1091	1091	1091
group_2427		hypothetical protein	2	2	1	1	2021	1	3148		1229	1229	1229
group_2428		hypothetical protein	2	2	1	1	2022	1	3149		752	752	752
group_2429		hypothetical protein	2	2	1	1	2023	1	3150		1139	1139	1139
lipA_2		Lipoyl synthase	2	2	1	1	2024	1	3151		986	986	986
acoA		Acetoin:2,6-dichlorophenolindophenol oxidoreductase subunit alpha	2	2	1	1	2025	1	3152		962	962	962
acoB		Acetoin:2,6-dichlorophenolindophenol oxidoreductase subunit beta	2	2	1	1	2026	1	3153		1019	1019	1019
pdhC		Dihydrolipoyllysine-residue acetyltransferase component of pyruvate dehydrogenase complex	2	2	1	1	2027	1	3154		1538	1538	1538
group_2434		Dihydrolipoyl dehydrogenase	2	2	1	1	2028	1	3155		1403	1403	1403
budC_1		Diacetyl reductase [(S)-acetoin forming]	2	2	1	1	2029	1	3156		785	785	785
gutB		Sorbitol dehydrogenase	2	2	1	1	2030	1	3157		1058	1058	1058
group_2437		hypothetical protein	2	2	1	1	2031	1	3158		911	911	911
norR_3		Anaerobic nitric oxide reductase transcription regulator NorR	2	2	1	1	2032	1	3159		1271	1271	1271
blh_2		Beta-lactamase hydrolase-like protein	2	2	1	1	2033	1	3160		695	695	695
group_2440		hypothetical protein	2	2	1	1	2034	1	3161		1655	1655	1655
group_2441		hypothetical protein	2	2	1	1	2035	1	3162		791	791	791
group_2442		hypothetical protein	2	2	1	1	2036	1	3163		1004	1004	1004
group_2443		hypothetical protein	2	2	1	1	2037	1	3164		917	917	917
rhaS_6		HTH-type transcriptional activator RhaS	2	2	1	1	2038	1	3165		854	854	854
hxlR_1		HTH-type transcriptional activator HxlR	2	2	1	1	2039	1	3166		395	395	395
azoR1_1		FMN-dependent NADH-azoreductase 1	2	2	1	1	2040	1	3167		608	608	608
group_2447		hypothetical protein	2	2	1	1	2041	1	3168		1349	1349	1349
nagR_1		HTH-type transcriptional repressor NagR	2	2	1	1	2042	1	3169		743	743	743
aprA		Adenylylsulfate reductase subunit alpha	2	2	1	1	2043	1	3170		1733	1733	1733
group_2450		hypothetical protein	2	2	1	1	2044	1	3171		245	245	245
ssuA_1		Putative aliphatic sulfonates-binding protein	2	2	1	1	2045	1	3172		1070	1070	1070
group_2452		hypothetical protein	2	2	1	1	2046	1	3173	Hypothetical protein with no hits to refseq/uniprot/clusters/cdd/tigrfams/pfam overlapping another protein with hits	419	419	419
group_2453		hypothetical protein	2	2	1	1	2047	1	3174		854	854	854
tauB		Taurine import ATP-binding protein TauB	2	2	1	1	2048	1	3175		839	839	839
group_2455		hypothetical protein	2	2	1	1	2049	1	3176		998	998	998
group_2456		hypothetical protein	2	2	1	1	2050	1	3177		281	281	281
group_2457		gp59	2	2	1	1	2051	1	3178		1286	1286	1286
fatA_2		Ferric-anguibactin receptor FatA	2	2	1	1	2052	1	3179		2183	2183	2183
aspA		Aspartate ammonia-lyase	2	2	1	1	2053	1	3180		1418	1418	1418
group_2460		hypothetical protein	2	2	1	1	2054	1	3181		185	185	185
group_2461		hypothetical protein	2	2	1	1	2055	1	3182		227	227	227
yjiE		HTH-type transcriptional regulator YjiE	2	2	1	1	2056	1	3183		896	896	896
pcpR_2		PCP degradation transcriptional activation protein	2	2	1	1	2057	1	3184		896	896	896
atoE		Putative short-chain fatty acid transporter	2	2	1	1	1296	1	3027		1409	1409	1409
scoB		putative succinyl-CoA:3-ketoacid coenzyme A transferase subunit B	2	2	1	1	1295	1	3026		641	641	641
scoA		putative succinyl-CoA:3-ketoacid coenzyme A transferase subunit A	2	2	1	1	1294	1	3025		704	704	704
gltC_4		HTH-type transcriptional regulator GltC	2	2	1	1	1293	1	3024		881	881	881
group_2468		hypothetical protein	2	2	1	1	1292	1	3023		389	389	389
group_2469		hypothetical protein	2	2	1	1	1291	1	3022		827	827	827
group_2470		hypothetical protein	2	2	1	1	1290	1	3021		401	401	401
group_2471		hypothetical protein	2	2	1	1	1289	1	3020		614	614	614
group_2472		putative lipoprotein	2	2	1	1	1288	1	3019		401	401	401
group_2473		hypothetical protein	2	2	1	1	1287	1	3018		1421	1421	1421
bdhA		D-beta-hydroxybutyrate dehydrogenase	2	2	1	1	1286	1	3017		785	785	785
group_2475		hypothetical protein	2	2	1	1	1285	1	940		986	986	986
pcaK_4		4-hydroxybenzoate transporter PcaK	2	2	1	1	1284	1	941		1343	1343	1343
group_2477		hypothetical protein	2	2	1	1	1283	1	942		1250	1250	1250
bacC_2		Dihydroanticapsin 7-dehydrogenase	2	2	1	1	1282	1	943		785	785	785
styA		Styrene monooxygenase StyA	2	2	1	1	1281	1	944		1238	1238	1238
group_2480	C1-hpah_2	p-hydroxyphenylacetate 3-hydroxylase, reductase component	2	2	1	1	1280	1	945		530	530	530
group_2481		hypothetical protein	2	2	1	1	1279	1	946		947	947	947
rhaS_7		HTH-type transcriptional activator RhaS	2	2	1	1	1278	1	947		524	524	524
group_2483		hypothetical protein	2	2	1	1	1277	1	948		455	455	455
antC		Anthranilate 1,2-dioxygenase electron transfer component	2	2	1	1	1276	1	949		1028	1028	1028
antB		Anthranilate 1,2-dioxygenase small subunit	2	2	1	1	1275	1	950		491	491	491
antA_1		Anthranilate 1,2-dioxygenase large subunit	2	2	1	1	1274	1	951		1415	1415	1415
group_2487		hypothetical protein	2	2	1	1	1273	1	952		350	350	350
modA		Molybdate-binding protein ModA	2	2	1	1	1272	1	954		785	785	785
group_249		putative TonB-dependent receptor	2	2	1	1	446	1	4573		1166	1238	1202
group_2490		ABC transporter	2	2	1	1	1270	1	955		620	620	620
dhbA		2,3-dihydro-2,3-dihydroxybenzoate dehydrogenase	2	2	1	1	724	1	956		770	770	770
group_2492		hypothetical protein	2	2	1	1	3331	1	3067		401	401	401
yhcR		Endonuclease YhcR	2	2	1	1	3332	1	3068		1811	1811	1811
pqqB		Coenzyme PQQ synthesis protein B	2	2	1	1	651	1	3767		911	911	911
pqqC		Pyrroloquinoline-quinone synthase	2	2	1	1	652	1	3768		758	758	758
pqqD		PqqA binding protein	2	2	1	1	653	1	3769		284	284	284
pqqE		PqqA peptide cyclase	2	2	1	1	654	1	3770		1154	1154	1154
group_2498		hypothetical protein	2	2	1	1	655	1	3771		1052	1052	1052
group_2499		hypothetical protein	2	2	1	1	656	1	3772		176	176	176
group_250		hypothetical protein	2	2	1	1	306	1	4571		266	314	290
group_2500		hypothetical protein	2	2	1	1	657	1	3773		236	236	236
group_2501		hypothetical protein	2	2	1	1	658	1	3774		587	587	587
clsC_1		Cardiolipin synthase C	2	2	1	1	659	1	3775		1526	1526	1526
group_2503		hypothetical protein	2	2	1	1	660	1	3776		467	467	467
group_2504		hypothetical protein	2	2	1	1	661	1	3777		365	365	365
group_2505		hypothetical protein	2	2	1	1	662	1	3778		1163	1163	1163
group_2506		hypothetical protein	2	2	1	1	663	1	3779		248	248	248
group_2507		hypothetical protein	2	2	1	1	664	1	3780		176	176	176
mrkD_2		Fimbria adhesin protein	2	2	1	1	666	1	2916		1016	1016	1016
htrE_2		Outer membrane usher protein HtrE	2	2	1	1	667	1	2917		2558	2558	2558
yadV_2		putative fimbrial chaperone YadV	2	2	1	1	3343	1	2918		734	734	734
group_2511		hypothetical protein	2	2	1	1	3350	1	4019		290	290	290
group_2512		hypothetical protein	2	2	1	1	3349	1	4020		1058	1058	1058
group_2513		hypothetical protein	2	2	1	1	3348	1	4021		710	710	710
group_2514	ssuD_1	Alkanesulfonate monooxygenase	2	2	1	1	3347	1	4022		1193	1193	1193
gsiB		Glutathione-binding protein GsiB	2	2	1	1	3346	1	4023		1574	1574	1574
gsiC_2		Glutathione transport system permease protein GsiC	2	2	1	1	3345	1	4024		1151	1151	1151
group_2517		hypothetical protein	2	2	1	1	3344	1	4025		848	848	848
group_2518		putative ABC transporter ATP-binding protein	2	2	1	1	12	1	4026		1817	1817	1817
soxC_3		Dibenzothiophene desulfurization enzyme C	2	2	1	1	13	1	4027		1268	1268	1268
soxB		2'-hydroxybiphenyl-2-sulfinate desulfinase	2	2	1	1	14	1	4028		1052	1052	1052
group_2521		Putative multidrug export ATP-binding/permease protein	2	2	1	1	15	1	4029		1856	1856	1856
yolH		ABC transporter	2	2	1	1	17	1	4062		1832	1832	1832
group_2523		hypothetical protein	2	2	1	1	494	1	4064		533	533	533
group_2524		hypothetical protein	2	2	1	1	493	1	4065		185	185	185
group_2525		hypothetical protein	2	2	1	1	492	1	4066		650	650	650
group_2526		hypothetical protein	2	2	1	1	2697	1	4067		386	386	386
group_2527		hypothetical protein	2	2	1	1	2700	1	4071		746	746	746
orf51		putative exonuclease	2	2	1	1	2701	1	4072		611	611	611
group_2529		hypothetical protein	2	2	1	1	2703	1	4074		458	458	458
group_2530		hypothetical protein	2	2	1	1	2705	1	4076		269	269	269
group_2531		hypothetical protein	2	2	1	1	2706	1	4077		200	200	200
fldP_2		Flavodoxin FldP	2	2	1	1	1300	1	4576		551	551	551
yfiH		Polyphenol oxidase	2	2	1	1	1301	1	4577		737	737	737
rluD		Ribosomal large subunit pseudouridine synthase D	2	2	1	1	1302	1	4578		1052	1052	1052
bamD		Outer membrane protein assembly factor BamD	2	2	1	1	1303	1	4579		1157	1157	1157
group_2536		DNA primase	2	2	1	1	1304	1	4580		1865	1865	1865
hemA		Glutamyl-tRNA reductase	2	2	1	1	1305	1	4581		1283	1283	1283
bepA_2		Beta-barrel assembly-enhancing protease	2	2	1	1	1306	1	4582		1709	1709	1709
lolB		Outer-membrane lipoprotein LolB	2	2	1	1	1307	1	4583		578	578	578
group_2540		putative ribose-phosphate pyrophosphokinase	2	2	1	1	1308	1	4584		950	950	950
rplY		50S ribosomal protein L25	2	2	1	1	1309	1	4585		296	296	296
pth		Peptidyl-tRNA hydrolase	2	2	1	1	1310	1	4586		581	581	581
panD		Aspartate 1-decarboxylase	2	2	1	1	1311	1	4587		380	380	380
group_2544		hypothetical protein	2	2	1	1	1312	1	4588		560	560	560
group_2545		hypothetical protein	2	2	1	1	1313	1	4589		1781	1781	1781
group_2546		3,4-dihydroxy-2-butanone 4-phosphate synthase	2	2	1	1	1314	1	4590		659	659	659
group_2547		5'-nucleotidase	2	2	1	1	1315	1	4591		674	674	674
thiD		Hydroxymethylpyrimidine/phosphomethylpyrimidine kinase	2	2	1	1	1316	1	4592		767	767	767
kbp		Potassium binding protein Kbp	2	2	1	1	1317	1	4593		473	473	473
group_2550		Acyl carrier protein	2	2	1	1	1318	1	4594		236	236	236
group_2551	fabG_3	3-oxoacyl-[acyl-carrier-protein] reductase FabG	2	2	1	1	1319	1	4595		734	734	734
fabD_2		Malonyl CoA-acyl carrier protein transacylase	2	2	1	1	1320	1	4596		986	986	986
rpmF		50S ribosomal protein L32	2	2	1	1	1321	1	4597		185	185	185
yceD		Large ribosomal RNA subunit accumulation protein YceD	2	2	1	1	1322	1	4598		560	560	560
group_2555		hypothetical protein	2	2	1	1	1323	1	4599		662	662	662
yciO		putative protein YciO	2	2	1	1	1324	1	4600		617	617	617
scpA		Segregation and condensation protein A	2	2	1	1	1325	1	4601		767	767	767
scpB		Segregation and condensation protein B	2	2	1	1	1326	1	4602		596	596	596
rluB		Ribosomal large subunit pseudouridine synthase B	2	2	1	1	1327	1	4603		923	923	923
bioD1		ATP-dependent dethiobiotin synthetase BioD 1	2	2	1	1	1328	1	4604		644	644	644
tam		Trans-aconitate 2-methyltransferase	2	2	1	1	1329	1	4605		749	749	749
bioF		8-amino-7-oxononanoate synthase	2	2	1	1	1330	1	4606		1157	1157	1157
bioA		Adenosylmethionine-8-amino-7-oxononanoate aminotransferase	2	2	1	1	1331	1	4607		1280	1280	1280
group_2564		hypothetical protein	2	2	1	1	1332	1	4608		734	734	734
otsB		Trehalose-6-phosphate phosphatase	2	2	1	1	1333	1	4609		851	851	851
otsA		Trehalose-6-phosphate synthase	2	2	1	1	1334	1	4610		1430	1430	1430
ybjJ		Inner membrane protein YbjJ	2	2	1	1	1335	1	4611		1247	1247	1247
bfr_2		Bacterioferritin	2	2	1	1	1336	1	4612		464	464	464
236		gp236	2	2	1	1	1337	1	4613		2036	2036	2036
zipA		Cell division protein ZipA	2	2	1	1	1338	1	4614		1037	1037	1037
smc		Chromosome partition protein Smc	2	2	1	1	1339	1	4615		3449	3449	3449
group_2572		hypothetical protein	2	2	1	1	1340	1	4616		695	695	695
group_2573		hypothetical protein	2	2	1	1	1341	1	4617		803	803	803
birA		Bifunctional ligase/repressor BirA	2	2	1	1	1342	1	4618		752	752	752
coaX		Type III pantothenate kinase	2	2	1	1	1343	1	4619		734	734	734
ffh		Signal recognition particle protein	2	2	1	1	1344	1	4620		1409	1409	1409
ypjD		Inner membrane protein YpjD	2	2	1	1	1345	1	4621		809	809	809
dusC		tRNA-dihydrouridine(16) synthase	2	2	1	1	1346	1	4622		944	944	944
group_2579		hypothetical protein	2	2	1	1	1347	1	4623		953	953	953
group_2580		hypothetical protein	2	2	1	1	1348	1	4624		2411	2411	2411
group_2581		hypothetical protein	2	2	1	1	1349	1	4625		725	725	725
group_2582		hypothetical protein	2	2	1	1	1350	1	4626		2135	2135	2135
group_2583		hypothetical protein	2	2	1	1	1351	1	4627		1307	1307	1307
group_2584		deoxycytidine triphosphate deaminase	2	2	1	1	1352	1	4628		569	569	569
group_2585		hypothetical protein	2	2	1	1	1353	1	4629		593	593	593
group_2586		hypothetical protein	2	2	1	1	1354	1	4630		566	566	566
mtnN_1		5'-methylthioadenosine/S-adenosylhomocysteine nucleosidase	2	2	1	1	1355	1	4631		872	872	872
group_2588		Iron-sulfur cluster carrier protein	2	2	1	1	1356	1	4632		1229	1229	1229
group_2589		hypothetical protein	2	2	1	1	1357	1	4633		500	500	500
metG		Methionine--tRNA ligase	2	2	1	1	1358	1	4634		2063	2063	2063
[truncated: 2,772 more rows]

## Sheet: Table S7
Table S8. Sample accession numbers of sequenced bacteriophages.
Name	run_accession	sample_accession
P92	ERR7959936	ERS3583551
T92	ERR7959937	ERS3583552
P1245	ERR7959938	ERS3583555
P515	ERR7959939	ERS3583557
T515	ERR7959940	ERS3583558
P521	ERR7959941	ERS3583559
P1033	ERR7959942	ERS3583561
P1257	ERR7959943	ERS3583567
T17	ERR7959944	ERS3583553
T55	ERR7959945	ERS3583554
T1245	ERR7959946	ERS3583556
P45	ERR7959947	ERS3583560
P1051	ERR7959948	ERS3583562
P245	ERR7959949	ERS3583563
P444	ERR7959950	ERS3583564
T444	ERR7959951	ERS3583565
P373	ERR7959952	ERS3583568
P24	ERR7959953	ERS3583569
P79	ERR7959954	ERS3583570
